# Supplementary material
Source: PubMed Central journal article supplement (PMC3345075)
Supplement: NIHMS370866-supplement-1_si_001.pdf [file NIHMS370866-supplement-1_si_001.pdf]

## SUPPORTING INFORMATION

### Isotope Effects and Heavy-Atom Tunneling in the Roush Allylboration of Aldehydes

Mathew J. Veticatt and Daniel A. Singleton\*

*Department of Chemistry, Texas A&M University, PO Box 30012,*

*College Station, Texas 77842*

[singleton@mail.chem.tamu.edu](mailto:singleton@mail.chem.tamu.edu)

#### Table of Contents

|                                                                    |          |
|--------------------------------------------------------------------|----------|
| Experimental Procedures and NMR Measurements.....                  | 3        |
| Computational Procedures and Supporting Computational Results..... | 3        |
| <b>General .....</b>                                               | <b>3</b> |
| <b>GAUSSRATE Calculations .....</b>                                | <b>3</b> |
| General .....                                                      | 3        |
| Gaussrate Rate Constants and CVT/SCT Correction Factors.....       | 4        |
| M06-2X/6-31+G** .....                                              | 4        |
| M06-2X/6-31+G**/PCM .....                                          | 4        |
| B3LYP/6-31+G** .....                                               | 5        |
| B3LYP/6-31+G**/PCM.....                                            | 5        |
| B3LYP KIEs .....                                                   | 5        |
| <b>The Contributions to the C2 KIE .....</b>                       | <b>5</b> |
| <b>Effect of Scaling Factor on KIEs.....</b>                       | <b>6</b> |
| <b>Calculated Structures and Energies .....</b>                    | <b>6</b> |
| Organization and Structure Names .....                             | 6        |
| Roush allylboronate 4 .....                                        | 6        |
| M062X/6-31+G** .....                                               | 6        |
| M062X/6-31+G**/PCM.....                                            | 7        |
| B3LYP/6-31G* .....                                                 | 7        |
| B3LYP/6-31+G** .....                                               | 8        |
| B3LYP/6-31+G** PCM solvent model for dichloromethane.....          | 8        |
| MPW1K/6-31+G** .....                                               | 9        |
| MPW1K/6-31+G** PCM solvent model for dichloromethane.....          | 9        |
| M05/6-31G* .....                                                   | 9        |
| <i>p</i> -anisaldehyde – 5 .....                                   | 10       |
| Conformation A, M062X/6-31+G** .....                               | 10       |
| Conformation A, M062X/6-31+G**/PCM .....                           | 10       |
| Conformation B, M062X/6-31+G** .....                               | 11       |
| Conformation B, M062X/6-31+G**/PCM.....                            | 11       |
| B3LYP/6-31G* .....                                                 | 11       |
| Conformation A, B3LYP/6-31+G** .....                               | 11       |
| Conformation B, B3LYP/6-31+G** .....                               | 12       |
| Conformation A, B3LYP/6-31+G**/PCM.....                            | 12       |
| Conformation B, B3LYP/6-31+G**/PCM.....                            | 12       |
| MPW1K/6-31+G** .....                                               | 13       |
| MPW1K/6-31+G** PCM solvent model for dichloromethane.....          | 13       |

|                                                                                                |           |
|------------------------------------------------------------------------------------------------|-----------|
| M05/6-31G* .....                                                                               | 13        |
| MP2/6-31G* .....                                                                               | 13        |
| Allylboronate model for 4 lacking ester groups used for POLYRATE calculations.....             | 14        |
| B3LYP/6-31+G** .....                                                                           | 14        |
| B3LYP/6-31+G** .....                                                                           | 14        |
| MPW1K/6-31+G** .....                                                                           | 14        |
| MPW1K/6-31+G** PCM solvent model for dichloromethane.....                                      | 15        |
| MP2/6-31G* .....                                                                               | 15        |
| Allylboronate model for TS 7 lacking ester groups used for POLYRATE calculations.....          | 15        |
| M062X/6-31+G** .....                                                                           | 15        |
| M062X/6-31+G**/PCM.....                                                                        | 16        |
| B3LYP/6-31+G** .....                                                                           | 16        |
| B3LYP/6-31+G**/PCM.....                                                                        | 16        |
| B3LYP/6-31G* .....                                                                             | 17        |
| MP2/6-31G* .....                                                                               | 17        |
| Transition structures for reaction of 4 and 5 – <i>Si</i> facial attack – 7 in manuscript..... | 18        |
| M062X/6-31+G** .....                                                                           | 18        |
| m062x/6-31+G**/PCM.....                                                                        | 18        |
| B3LYP/6-31G* .....                                                                             | 19        |
| B3LYP/6-31+G** .....                                                                           | 20        |
| B3LYP/6-31+G**/PCM.....                                                                        | 20        |
| MPW1K/6-31+G** .....                                                                           | 21        |
| MPW1K/6-31+G** PCM solvent model for dichloromethane.....                                      | 21        |
| M05/6-31G* .....                                                                               | 22        |
| Transition structures for reaction of 4 and 5 with <i>Re</i> facial attack .....               | 23        |
| M062X/6-31+G** .....                                                                           | 23        |
| M062X/6-31+G**/PCM.....                                                                        | 23        |
| B3LYP/6-31G* .....                                                                             | 24        |
| B3LYP/6-31+G** .....                                                                           | 24        |
| B3LYP/6-31+G** PCM solvent model for dichloromethane.....                                      | 25        |
| MPW1K/6-31+G** PCM solvent model for dichloromethane.....                                      | 26        |
| Prereactive Complex Used in Polyrate Calculation.....                                          | 26        |
| M062X/6-31+G** .....                                                                           | 26        |
| M062X/6-31+G**/PCM.....                                                                        | 27        |
| B3LYP/6-31+G** .....                                                                           | 27        |
| B3LYP/6-31+G**/PCM.....                                                                        | 27        |
| Product Complex Used in Polyrate Calculation .....                                             | 28        |
| M062X/6-31+G** .....                                                                           | 28        |
| M062X/6-31+G**/PCM.....                                                                        | 28        |
| B3LYP/6-31+G** .....                                                                           | 29        |
| B3LYP/6-31+G**/PCM.....                                                                        | 29        |
| Sample input files for POLYRATE calculations.....                                              | 30        |
| file p.dat .....                                                                               | 30        |
| File p.70 .....                                                                                | 32        |
| <b>References .....</b>                                                                        | <b>32</b> |

## Experimental Procedures and NMR Measurements

The Roush allylboronate **4** was synthesized using literature procedures (S1). A solution containing 0.284 g (1 mmol) of **4** in 8 mL of dichloromethane was cooled in a dry ice- acetone bath and maintained at  $-78\text{ }^{\circ}\text{C}$ . To this solution was added 0.136 g (1 mmol) of **5**. The reaction mixture was stirred for 2 h before the reaction was quenched by the addition of 10 mL of 0.1 N NaOH and 30 mL of diethyl ether. This two phase mixture was stirred vigorously for 30 min at room temperature to hydrolyze the boronate protected alcohol to the homoallylic alcohol **6**. The resulting mixture was extracted with three portions of 10 mL of diethyl ether, and the combined organic layers were dried over  $\text{Na}_2\text{SO}_4$ . The solvent was then removed under reduced pressure to afford 0.2 g of the crude product mixture. The crude mixture was then subjected to flash chromatography using dichloromethane as eluent and 0.170 g (95 % yield) of **6** was isolated. The isolated products characterized by  $^1\text{H}$  NMR, were found to be free of starting materials or any other impurities. For KIE measurements, a scaled up analog (15 mmol scale and 3 mmol of limiting reagent) of the above mentioned procedure was used. Conversions were determined by the comparison of starting material and product peaks in the NMR spectrum of the crude reaction mixture. The absence of any visible side products and complete consumption of the limiting reagent were confirmed by  $^1\text{H}$  NMR. As a particular example, for the reaction of **4** and **5**, separate reactions were taken to  $18 \pm 2\%$  conversion in **4** and  $20 \pm 2\%$  conversion in **5** by using limiting amounts of the other reagent. The  $^{13}\text{C}$  isotopic composition of the two samples of **6**, isolated from these two reactions was compared against each other in order to determine KIEs.

**NMR measurements.** All samples were prepared using a constant 295 mg of **6** in 5 mm NMR tubes filled to a constant height of 5.0 cm. The  $^{13}\text{C}$  spectra were recorded at 125.70 MHz using inverse gated decoupling, 52.5 s delays (5 times T1) between calibrated  $\pi/2$  pulses, and a 5.0 s acquisition time to collect 195312 points. Integrations were numerically determined using a constant integration region for each peak. A zero-order baseline correction was generally applied, but no first-order correction was applied. Six spectra were recorded for each sample of recovered **6**.

## Computational Procedures and Supporting Computational Results

### General

All of the M06-2X/6-31+G\*\*, M06-2X/6-31+G\*\*/PCM, B3LYP/6-31+G\*\*, and B3LYP/6-31+G\*\*/PCM calculations of structures, energies, and frequencies employed standard procedures in Gaussian 09 (S2, see the last section for the complete reference) unless otherwise noted. All of the B3LYP/6-31G\*, MPW1K, MP2, and M05 calculations of structures, energies, and frequencies employed standard procedures in Gaussian 03 (S3) unless otherwise noted. PCM calculations in Gaussian 09 were carried out with the solvent being dichloromethane. Complete structures and energetics are provided in a section below.

### GAUSSRATE Calculations

#### General

A number of the calculations in the manuscript made use of the programs GAUSSRATE (reference 17 in the main text) and POLYRATE (reference 18 in the main text, see the last section for the complete reference) (S4). These programs were modified in minor ways. In particular, the subroutine *mepout* was modified to output frequencies with higher precision, and the utility program *shuttle* was modified to save copies of all frequency calculations so that data could be extracted from

them later.

To show the complete set of options selected for these calculations, a sample set of input files for GAUSSRATE / POLYRATE are given in a later section. For the sake of simplicity, the starting material in these calculations was generally taken to be a minimized loose complex of reactants. Such complexes are not kinetically significant but the process employed in the main text of multiplying the TST KIE (not based on a loose complex but rather on separate starting materials) times a CVT/SCT correction avoids having the loose complexes have any effect on the final results.

The Gaussian command int(grid=ultrafine) was used for the calculations, and the starting structures were optimized with tight convergence criteria.

### Gaussrate Rate Constants and CVT/SCT Correction Factors

The KIEs that are listed are not directly meaningful, in part because they are for the model system instead of the real system and in part because the formal starting material in this case is the prereactive complex instead of the free separate starting materials.

#### M06-2X/6-31+G\*\*

|                    | parent     | C1-13C     | C4-13C     | C2-13C     | C3-13C    |
|--------------------|------------|------------|------------|------------|-----------|
| TST                | 4.1754E-02 | 4.0227E-02 | 4.0953E-02 | 4.0668E-02 | 4.18E-02  |
| CVT                | 4.1512E-02 | 3.9971E-02 | 4.0683E-02 | 4.0443E-02 | 4.05E-02  |
| CVT/SCT            | 5.5302E-02 | 5.2832E-02 | 5.4105E-02 | 5.3313E-02 | 5.37E-02* |
| SCT acceleration   | 1.32       |            |            |            |           |
| KIE                |            |            |            |            |           |
| TST                |            | 1.038      | 1.020      | 1.027      | 0.999     |
| CVT                |            | 1.039      | 1.020      | 1.026      | 0.999     |
| CVT/SCT            |            | 1.047      | 1.022      | 1.037      | 0.999     |
| CVT/SCT correction |            | 1.0085     | 1.0025     | 1.0103     | 1.0006*   |

\*The C3-13C rate constants were calculated with a shorter path link than the others, and the KIEs are based on parent rate constants calculated for the same path link. Considering the low effect of tunneling on the C3-13C KIE, the KIEs were numerically converged at a lower path link, so the calculation was not extended.

#### M06-2X/6-31+G\*\*/PCM

|                    | parent     | C1-13C     | C4-13C     | C2-13C     | C3-13C     |
|--------------------|------------|------------|------------|------------|------------|
| TST                | 3.5428E-01 | 3.4002E-01 | 3.4772E-01 | 3.4572E-01 | 3.5471E-01 |
| CVT                | 3.5346E-01 | 3.3911E-01 | 3.4674E-01 | 3.4500E-01 | 3.5390E-01 |
| CVT/SCT            | 4.8095E-01 | 4.5715E-01 | 4.7120E-01 | 4.6348E-01 | 4.8105E-01 |
| SCT acceleration   | 1.36       |            |            |            |            |
| KIE                |            |            |            |            |            |
| TST                |            | 1.04194    | 1.01887    | 1.02476    | 0.99879    |
| CVT                |            | 1.042      | 1.019      | 1.025      | 0.999      |
| CVT/SCT            |            | 1.052      | 1.021      | 1.038      | 1.000      |
| CVT/SCT correction | correction | 1.009716   | 1.0018     | 1.0126     | 1.0010     |

**B3LYP/6-31+G\*\***

|                    | parent     | C1-13C     | C4-13C     | C2-13C     | C3-13C     |
|--------------------|------------|------------|------------|------------|------------|
| TST                | 1.4120E-11 | 1.3584E-11 | 1.3813E-11 | 1.3764E-11 | 1.4160E-11 |
| CVT                | 1.3996E-11 | 1.3459E-11 | 1.3683E-11 | 1.3649E-11 | 1.4037E-11 |
| CVT/SCT            | 2.0122E-11 | 1.9170E-11 | 1.9606E-11 | 1.9408E-11 | 2.0172E-11 |
| SCT acceleration   | 1.43       |            |            |            |            |
| KIE                |            |            |            |            |            |
| TST                |            | 1.03946    | 1.02223    | 1.02586    | 0.99718    |
| CVT                |            | 1.040      | 1.023      | 1.025      | 0.997      |
| CVT/SCT            |            | 1.050      | 1.026      | 1.037      | 0.998      |
| CVT/SCT correction |            | 1.0098     | 1.0040     | 1.0106     | 1.0003     |

**B3LYP/6-31+G\*\*/PCM**

|                    | parent     | C1-13C     | C4-13C     | C2-13C     | C3-13C     |
|--------------------|------------|------------|------------|------------|------------|
| TST                | 1.0234E-11 | 9.8090E-12 | 1.0024E-11 | 1.0007E-11 | 1.0277E-11 |
| CVT                | 1.0179E-11 | 9.7542E-12 | 9.9659E-12 | 9.9569E-12 | 1.0222E-11 |
| CVT/SCT            | 1.5540E-11 | 1.4715E-11 | 1.5163E-11 | 1.4966E-11 | 1.5590E-11 |
| SCT acceleration   | 1.52       |            |            |            |            |
| KIE                |            |            |            |            |            |
| TST                |            | 1.04333    | 1.02095    | 1.02268    | 0.996      |
| CVT                |            | 1.044      | 1.021      | 1.022      | 0.996      |
| CVT/SCT            |            | 1.056      | 1.025      | 1.038      | 0.997      |
| CVT/SCT correction |            | 1.0122     | 1.0038     | 1.0153     | 1.0010     |

**B3LYP KIEs**

| Method                            | C1    | C2    | C3    | C4    |
|-----------------------------------|-------|-------|-------|-------|
| <u>Conventional TST KIEs</u>      |       |       |       |       |
| Gas phase                         | 1.038 | 1.026 | 0.996 | 1.019 |
| PCM                               | 1.044 | 1.026 | 0.997 | 1.018 |
| <u>CVT / SCT corrections</u>      |       |       |       |       |
| Gas phase                         | 1.010 | 1.011 | 1.000 | 1.004 |
| PCM                               | 1.010 | 1.015 | 1.001 | 1.004 |
| <u>CVT / SCT KIEs<sup>a</sup></u> |       |       |       |       |
| Gas phase                         | 1.048 | 1.037 | 0.996 | 1.023 |
| PCM                               | 1.056 | 1.041 | 0.998 | 1.022 |

**The Contributions to the C2 KIE**

We describe in the main text the components of the C2 KIE and their percentage contribution to the overall KIE. The reduced isotopic partition function at C2 for the transition state is 1.234252 at 195.15° and it is 1.242288 in the ground state, and the ratio of these contributes 1.0065 to the KIE. The scaled imaginary frequency in the parent isotopomer is -340.4614 and it is -334.36707 in the

labeled compound, contributing 1.0182 to the KIE. The CVT/SCT correction is 1.0126. The multiple of these three components is the isotope effect.

### Effect of Scaling Factor on KIEs

The table below shows how the choice of scaling factor influences the size of the KIE predicted from transition state theory for the M06-2X/6-31+G\*\*/PCM calculations. The results show, as described in footnote 13 of the main text, that small changes in the scaling factor have a negligible effect on the predicted isotope effects. It should be noted that there is no perfect or unambiguous choice of scaling factor, as the appropriate scaling factor would vary for high frequencies (which tend to dominate the choice of scaling factor when determined by normal procedures) versus low frequencies (which are more important in carbon KIEs). Luckily, the choice makes little difference, and we have adopted the procedure of using 0.9614 consistently, simply because it was the choice we used in one of our earliest publications of KIE predictions.

| Scaling Factor: | 0.94   | 0.9614 | 0.98   | 1.00   |
|-----------------|--------|--------|--------|--------|
| C1              | 1.0405 | 1.0410 | 1.0416 | 1.0421 |
| C4              | 1.0160 | 1.0164 | 1.0167 | 1.0171 |
| C3              | 0.9986 | 0.9984 | 0.9983 | 0.9981 |
| C2              | 1.0248 | 1.0249 | 1.0249 | 1.0250 |

### Calculated Structures and Energies

#### Organization and Structure Names

The data below is organized by structure and method/basis set. For PCM calculations (in dichloromethane using default procedures), the title includes “PCM” at the end. Under each structure title, the first line is the original file names for the computational output files. This lets us use a single code name for structures, energies in tables, and our records. The second line is the description used by the researcher in the calculational input file. The third line is the potential energy. Other lines are self-explanatory.

Exploratory B3LYP / 6-31G\* / gas phase calculations were used to delimit the most stable conformers, and only these were considered in later calculations. An exception occurred with anisaldehyde where two conformers are extremely close in energy, and both are listed. The conformers are designated as Conformation A and Conformation B.

#### Roush allylboronate 4

Total 228.470 79.296 163.518

#### M062X/6-31+G\*\*

RoushAllylboronateM06

Roush allylboronate

E(RM062X) = -983.975258156

Zero-point correction= 0.341949 (Hartree/Particle)

Thermal correction to Energy= 0.364090

Thermal correction to Enthalpy= 0.365034

Thermal correction to Gibbs Free Energy= 0.287341

Sum of electronic and ZPE= -983.633309

Sum of electronic and thermal Energies= -983.611168

Sum of electronic and thermal Enthalpies= -983.610224

Sum of electronic and thermal Free Energies= -983.687917

C,0,-0.6918578101,3.2256244532,-0.3732879523  
 B,0,-1.500551353,1.8996548396,-0.5588223154  
 O,0,-1.9560856357,1.1258727796,0.48874846  
 C,0,-2.8500627484,0.1723798898,-0.0352211819  
 C,0,-4.285325361,0.6588793567,0.1236583872  
 O,0,-5.135458447,-0.3636075614,-0.0122558877  
 C,0,-6.5508316484,-0.0439137114,-0.0338242091  
 C,0,0.1319892972,3.6122776052,-1.5684479321  
 C,0,1.4447687049,3.8362469944,-1.5442548599  
 O,0,-1.890701022,1.38763321,-1.7789649634  
 C,0,-2.4954017059,0.1347400881,-1.5530297295  
 C,0,-1.4937951041,-0.9844234873,-1.8143367207  
 O,0,-2.1353038478,-2.1440278762,-1.9945550027  
 C,0,-1.3151634571,-3.329156074,-2.1654613426  
 O,0,-0.2986265038,-0.8420689268,-1.7951123893  
 O,0,-4.5969458838,1.8112776964,0.285014953

E CV S  
 KCal/Mol Cal/Mol-K Cal/Mol-K

H,0,-3.3746578304,0.0027928368,-2.1893704993  
H,0,-2.7265410928,-0.7966204471,0.4543326673  
H,0,-0.0715017252,3.1567916192,0.526908661  
H,0,-1.441358348,4.0056694886,-0.1674629321  
H,0,-0.4026501054,3.6933105973,-2.5143997436  
H,0,1.9913783402,4.0990021876,-2.4440615573  
H,0,2.0153608094,3.754531929,-0.6220628464  
C,0,-2.2049563671,-4.5031740532,-1.8064267521  
C,0,-0.7995892324,-3.382904087,-3.5937151484  
H,0,-0.4762998766,-3.246234314,-1.4671238708  
C,0,-7.2722581319,-1.3308821061,0.3139713164  
H,0,-6.7220382939,0.7197941661,0.7308993335  
C,0,-6.918259859,0.4983734158,-1.4051511292  
H,0,-0.1929313463,-4.2821341475,-3.7339461133  
H,0,-1.639681338,-3.4189312883,-4.2941916132  
H,0,-0.1806011799,-2.5112604057,-3.8157062731  
H,0,-1.638772296,-5.4348668166,-1.8880212352  
H,0,-2.5790910262,-4.4102608318,-0.7840281593  
H,0,-3.0592488118,-4.5550642089,-2.4879624007  
H,0,-8.3509916651,-1.1549450372,0.3403852574  
H,0,-7.0636855568,-2.0987059904,-0.4370226114  
H,0,-6.9554130759,-1.7024097337,1.2912573758  
H,0,-7.9853724711,0.7357075575,-1.4371598167  
H,0,-6.3581720001,1.410281556,-1.6248646615  
H,0,-6.7079439936,-0.2518731624,-2.1740365613

**M062X/6-31+G\*\*/PCM**

RoushAllylboronateM06PCM

Roush allylboronate

E(RM062X) = -983.987751142

Zero-point correction= 0.341325 (Hartree/Particle)  
Thermal correction to Energy= 0.363552  
Thermal correction to Enthalpy= 0.364497  
Thermal correction to Gibbs Free Energy= 0.286060  
Sum of electronic and ZPE= -983.646426  
Sum of electronic and thermal Energies= -983.624199  
Sum of electronic and thermal Enthalpies= -983.623255  
Sum of electronic and thermal Free Energies= -983.701691

| E        | CV        | S         |
|----------|-----------|-----------|
| KCal/Mol | Cal/Mol-K | Cal/Mol-K |
| Total    | 228.133   | 79.466    |

C,0,-0.6312441762,3.2085351343,-0.2733741397  
B,0,-1.459497186,1.8999143513,-0.4989854572  
O,0,-1.9381912401,1.1116267345,0.5270933218  
C,0,-2.8234149584,0.1619555883,-0.0292387195  
C,0,-4.2634140202,0.6363595207,0.128418409  
O,0,-5.1022139679,-0.3718200858,-0.0841344935  
C,0,-6.527420785,-0.0698450957,-0.1208719394  
C,0,0.0574318247,3.717619729,-1.5073110629  
C,0,1.3725010187,3.9036947861,-1.6235517732  
O,0,-1.8256851613,1.4083857374,-1.7339474948  
C,0,-2.4501220999,0.1554531632,-1.5417923639  
C,0,-1.4667303233,-0.9728842678,-1.8340492587  
O,0,-2.118241685,-2.1278056121,-1.9265321514  
C,0,-1.3289513075,-3.3363207026,-2.1256692261  
O,0,-0.2705836712,-0.8274873806,-1.9167754512  
O,0,-4.5756857879,1.7807111712,0.3582519202  
H,0,-3.3234711784,0.0528331666,-2.1910740776  
H,0,-2.6993768073,-0.8143734788,0.4443360869  
H,0,0.0874188162,3.0490312113,0.5388148121  
H,0,-1.3439527153,3.9615788743,0.0956219365  
H,0,-0.5842333007,3.9343920498,-2.3613689536

H,0,1.812555407,4.2653179105,-2.5475257094  
H,0,2.0483989067,3.6955377703,-0.7970389706  
C,0,-2.1863152153,-4.4782524363,-1.6187740705  
C,0,-0.9726414803,-3.4595828509,-3.5968260296  
H,0,-0.4235304615,-3.230723046,-1.5214592781  
C,0,-7.2352699788,-1.3810676691,0.1526258369  
H,0,-6.7237141736,0.6524393938,0.6764267616  
C,0,-6.8674285214,0.527344617,-1.4753379268  
H,0,-0.3791714229,-4.3642439709,-3.7545364176  
H,0,-1.8832674194,-3.5321446096,-4.1990502437  
H,0,-0.3874901205,-2.6000023834,-3.9309512678  
H,0,-1.6370762499,-5.4180998125,-1.7172977428  
H,0,-2.4457000995,-4.3350311556,-0.5671541253  
H,0,-3.1075415265,-4.5516179156,-2.2042687398  
H,0,-8.3160681468,-1.2185459818,0.153517133  
H,0,-6.9956292642,-2.1124594224,-0.6249725899  
H,0,-6.9413576651,-1.7873955782,1.1232115734  
H,0,-7.9359926305,0.7537913293,-1.5198921015  
H,0,-6.3127051079,1.4532190465,-1.6456720966  
H,0,-6.6296051177,-0.1866598298,-2.2698304993

**B3LYP/6-31G\***

allylDIPEB3G

E(RB+HF-LYP) = -984.337966629

|                                              |             |
|----------------------------------------------|-------------|
| Zero-point correction=                       | 0.340007    |
| (Hartree/Particle)                           |             |
| Thermal correction to Energy=                | 0.362511    |
| Thermal correction to Enthalpy=              | 0.363456    |
| Thermal correction to Gibbs Free Energy=     | 0.283586    |
| Sum of electronic and zero-point Energies=   | -983.997959 |
| Sum of electronic and thermal Energies=      | -983.975455 |
| Sum of electronic and thermal Enthalpies=    | -983.974511 |
| Sum of electronic and thermal Free Energies= | -984.054380 |

|       | E (Thermal) | CV             | S              |
|-------|-------------|----------------|----------------|
|       | KCal/Mol    | Cal/Mol-Kelvin | Cal/Mol-Kelvin |
| Total | 227.479     | 79.947         | 168.099        |

C,0,-0.6928121108,3.4043810485,-0.4831929267  
B,0,-1.4939628235,2.0643779101,-0.6552349001  
O,0,-2.0351197813,1.3564288316,0.3970872275  
C,0,-2.8604069072,0.3329406739,-0.1330591621  
C,0,-4.3323654768,0.7343480689,-0.0150086763  
O,0,-5.1084427517,-0.3637466,-0.0518756739  
C,0,-6.5588200688,-0.1629525299,-0.0308221509  
C,0,0.4238437702,3.5896790401,-1.477362  
C,0,1.7050040305,3.7866859385,-1.1650577678  
O,0,-1.7763549611,1.4851450752,-1.8750105349  
C,0,-2.4364152836,0.252143912,-1.6432677746  
C,0,-1.4735841645,-0.9153330302,-1.8700280179  
O,0,-2.1748048699,-2.0405588645,-2.102864935  
C,0,-1.417307021,-3.2848213706,-2.2508315917  
O,0,-0.2699325373,-0.8357635471,-1.7941242043  
O,0,-4.7254760483,1.8761991297,0.0510381806  
H,0,-3.2957160363,0.1496780671,-2.3110999173  
H,0,-2.6920277702,-0.6067007697,0.3987373411  
H,0,-0.3197653846,3.483260539,0.5448354008  
H,0,-1.4308174954,4.2171027313,-0.6006145222  
H,0,0.1363928923,3.5388526776,-2.5276696467  
H,0,2.4676757377,3.9014246985,-1.9306235174  
H,0,2.0421375634,3.8360354691,-0.1312905553  
C,0,-2.3622610243,-4.3999504002,-1.8277968819  
C,0,-0.9270172888,-3.406873454,-3.68916844  
H,0,-0.5613072996,-3.2221189254,-1.5726289583

C,0,-7.1450987062,-1.4336634737,0.5661925491  
H,0,-6.7533141441,0.6962812475,0.6172425708  
C,0,-7.0468460719,0.1349242933,-1.4440581099  
H,0,-0.3769130801,-4.3456748892,-3.8185027465  
H,0,-1.7720842276,-3.4038311727,-4.3866120138  
H,0,-0.2560793903,-2.5806642227,-3.9391186734  
H,0,-1.8487455168,-5.3657684224,-1.8838687094  
H,0,-2.7066544921,-4.2514832733,-0.7995194733  
H,0,-3.2386402636,-4.4373062568,-2.4840559979  
H,0,-8.2339688196,-1.3427618807,0.6420249958  
H,0,-6.914763118,-2.3014195469,-0.0616344715  
H,0,-6.7435941416,-1.6148910484,1.5680322109  
H,0,-8.1351250374,0.2620843433,-1.4454297859  
H,0,-6.5969945241,1.0572885366,-1.8220512265  
H,0,-6.7961443556,-0.6896005538,-2.1208635132

**B3LYP/6-31+G\*\***

allylDIPEB3+G

E(RB+HF-LYP) = -984.403985383

Zero-point correction= 0.337622  
(Hartree/Particle)  
Thermal correction to Energy= 0.360288  
Thermal correction to Enthalpy= 0.361233  
Thermal correction to Gibbs Free Energy= 0.280740  
Sum of electronic and zero-point Energies= -984.066364  
Sum of electronic and thermal Energies= -984.043697  
Sum of electronic and thermal Enthalpies= -984.042753  
Sum of electronic and thermal Free Energies= -984.123245

|       | E (Thermal)<br>KCal/Mol | CV<br>Cal/Mol-Kelvin | S<br>Cal/Mol-Kelvin |
|-------|-------------------------|----------------------|---------------------|
| Total | 226.084                 | 80.499               | 169.410             |

C,0,-0.6148705272,3.4266257475,-0.4580849538  
B,0,-1.4329047093,2.0970114756,-0.6210707029  
O,0,-2.1003667666,1.4869360281,0.4208405587  
C,0,-2.8791792538,0.4179555562,-0.0929018759  
C,0,-4.3647873236,0.7862127285,-0.0676672718  
O,0,-5.1134586629,-0.3277757946,0.0167319583  
C,0,-6.5737060023,-0.1783951352,-0.0227914688  
C,0,0.4436988008,3.6617647577,-1.5025680886  
C,0,1.7386391176,3.8759199957,-1.251423185  
O,0,-1.617887369,1.4308523121,-1.814711975  
C,0,-2.3709553164,0.250091981,-1.5746581665  
C,0,-1.475001646,-0.9839504244,-1.706900554  
O,0,-2.1861989645,-2.0255642598,-2.1733069477  
C,0,-1.5042239085,-3.3204744344,-2.2947774683  
O,0,-0.3074061707,-1.0152166351,-1.3870606533  
O,0,-4.7910477479,1.916727896,-0.1522576666  
H,0,-3.1910579004,0.1819571429,-2.29296997  
H,0,-2.7178548091,-0.4809491476,0.5068112187  
H,0,-0.1872600908,3.4702860324,0.5508074322  
H,0,-1.3605233407,4.2391364465,-0.4992478542  
H,0,0.1052668204,3.6419519673,-2.5383753159  
H,0,2.4537739699,4.0309876466,-2.0540163617  
H,0,2.1282611385,3.8968180884,-0.2357210687  
C,0,-2.5834595228,-4.3794252795,-2.1259568046  
C,0,-0.7866478552,-3.38200682,-3.638325319  
H,0,-0.775288355,-3.3748721631,-1.4812983787  
C,0,-7.1344299097,-1.3582620134,0.7569963203  
H,0,-6.8097340174,0.7647014796,0.477789268  
C,0,-7.0346540969,-0.1259584744,-1.4748103685  
H,0,-0.2788990247,-4.3467789332,-3.7423813186  
H,0,-1.5004574853,-3.2779672796,-4.4623538949

H,0,-0.0350697415,-2.5924203759,-3.7158119388  
H,0,-2.1345158671,-5.3764306659,-2.1799675913  
H,0,-3.0833210639,-4.2789490059,-1.1582027505  
H,0,-3.3366343778,-4.2980453056,-2.9165641239  
H,0,-8.2267453825,-1.293958489,0.7903630018  
H,0,-6.8596227241,-2.3059170938,0.2821864467  
H,0,-6.7583992111,-1.3620576034,1.7840812391  
H,0,-8.1242990414,-0.0236435571,-1.5137366117  
H,0,-6.5970325102,0.7309888081,-1.9935875565  
H,0,-6.7563681509,-1.0445291992,-2.0022112383

**B3LYP/6-31+G\*\* PCM solvent model for dichloromethane**

allylDIPEpcmB3+G

E(RB+HF-LYP) = -984.419408447

Zero-point correction= 0.336478  
(Hartree/Particle)  
Thermal correction to Energy= 0.359114  
Thermal correction to Enthalpy= 0.360059  
Thermal correction to Gibbs Free Energy= 0.280591  
Sum of electronic and zero-point Energies= -984.082930  
Sum of electronic and thermal Energies= -984.060294  
Sum of electronic and thermal Enthalpies= -984.059350  
Sum of electronic and thermal Free Energies= -984.138817

|       | E (Thermal)<br>KCal/Mol | CV<br>Cal/Mol-Kelvin | S<br>Cal/Mol-Kelvin |
|-------|-------------------------|----------------------|---------------------|
| Total | 225.348                 | 80.654               | 167.254             |

C,0,-0.5965702016,3.4423500144,-0.4415008958  
B,0,-1.4122825091,2.1120657015,-0.6130712915  
O,0,-2.0804303562,1.4996776007,0.4280094072  
C,0,-2.8595791258,0.4237807401,-0.0851896576  
C,0,-4.3476381016,0.7821687955,-0.0404638697  
O,0,-5.0844330505,-0.3308389042,-0.0199570142  
C,0,-6.5538539487,-0.2100458149,-0.0539912862  
C,0,0.4396821062,3.7095755354,-1.5007353575  
C,0,1.7407023623,3.9167388403,-1.2684828442  
O,0,-1.5988699685,1.4474102938,-1.8073455503  
C,0,-2.3597665959,0.2649787142,-1.5701198081  
C,0,-1.4696851188,-0.9727566206,-1.713300406  
O,0,-2.1893888657,-2.0092677475,-2.1487341485  
C,0,-1.534880313,-3.3255027583,-2.267236757  
O,0,-0.2902365582,-0.9980032817,-1.4190982392  
O,0,-4.7760777668,1.9201105912,-0.0585555183  
H,0,-3.1800442796,0.2081607895,-2.2913361624  
H,0,-2.6861542664,-0.475286073,0.5158924496  
H,0,-0.1483560202,3.4681992113,0.5600465593  
H,0,-1.3476422587,4.2521175447,-0.4529212367  
H,0,0.0788607218,3.7296823886,-2.5314494632  
H,0,2.4388892206,4.1013617478,-2.0811147857  
H,0,2.1505396313,3.9034612291,-0.2596184457  
C,0,-2.6330834967,-4.3548264737,-2.0498959477  
C,0,-0.8636657624,-3.4231816732,-3.6316635641  
H,0,-0.7867705225,-3.3835903074,-1.4695695617  
C,0,-7.0860942791,-1.4364050054,0.6710137535  
H,0,-6.8108169142,0.703403902,0.4924957168  
C,0,-7.009386946,-0.1070234658,-1.5040300441  
H,0,-0.3798289333,-4.4005834429,-3.7314819513  
H,0,-1.6025731762,-3.3212064703,-4.4336336957  
H,0,-0.0990024099,-2.6511056118,-3.7522741658  
H,0,-2.2046235671,-5.361008471,-2.1000041088  
H,0,-3.1003061529,-4.2283004074,-1.0689565213  
H,0,-3.4063548582,-4.2701736614,-2.8206647719  
H,0,-8.1794931097,-1.3945794514,0.7046903922



H,0,-6.7921347871,-2.3553749877,0.1532003439  
 H,0,-6.7116595893,-1.477083942,1.6981392378  
 H,0,-8.1007724456,-0.0238581607,-1.5390704028  
 H,0,-6.587031174,0.7769090416,-1.9902715339  
 H,0,-6.7138156129,-0.9987719493,-2.0668248533

**MPW1K/6-31+G\*\***

allylDIPEMPW1K+G

E(RmPW+HF-PW91) = -984.096716555

Zero-point correction= 0.348854  
 (Hartree/Particle)  
 Thermal correction to Energy= 0.370963  
 Thermal correction to Enthalpy= 0.371907  
 Thermal correction to Gibbs Free Energy= 0.292762  
 Sum of electronic and zero-point Energies= -983.747863  
 Sum of electronic and thermal Energies= -983.725753  
 Sum of electronic and thermal Enthalpies= -983.724809  
 Sum of electronic and thermal Free Energies= -983.803954

|       | E (Thermal) | CV             | S              |
|-------|-------------|----------------|----------------|
|       | KCal/Mol    | Cal/Mol-Kelvin | Cal/Mol-Kelvin |
| Total | 232.783     | 78.099         | 166.575        |

C,0,-0.6595658545,3.2745751399,-0.3685693948  
 B,0,-1.4646159836,1.9561771749,-0.5784322951  
 O,0,-2.0044295739,1.2292135015,0.4498385758  
 C,0,-2.8460230692,0.2564424235,-0.093779678  
 C,0,-4.2937968191,0.6938215297,0.0178459622  
 O,0,-5.0974511263,-0.3542214008,-0.0829901212  
 C,0,-6.5178752083,-0.1100463099,-0.0786678899  
 C,0,0.2368869438,3.6526697007,-1.5005108838  
 C,0,1.539653612,3.8771047152,-1.3967475437  
 O,0,-1.7678121991,1.4091800329,-1.7964732233  
 C,0,-2.4209384291,0.1919517658,-1.5855645096  
 C,0,-1.4689653923,-0.96642536,-1.8122191955  
 O,0,-2.1525426055,-2.0791448374,-2.0382222395  
 C,0,-1.4039129331,-3.3000874785,-2.2000598404  
 O,0,-0.276478216,-0.8845065553,-1.7466063069  
 O,0,-4.6469619199,1.8318237251,0.1403515308  
 H,0,-3.2696397847,0.0908423326,-2.257149567  
 H,0,-2.7187142999,-0.6934398695,0.4187086461  
 H,0,-0.1059926487,3.2157980413,0.5683274351  
 H,0,-1.414537729,4.0550249029,-0.2184695649  
 H,0,-0.2316021301,3.734735601,-2.4740381666  
 H,0,2.1351942232,4.1397081377,-2.2582271161  
 H,0,2.0545816527,3.7983360022,-0.4487100129  
 C,0,-2.3348511402,-4.4173745963,-1.8008120828  
 C,0,-0.9175400569,-3.404195775,-3.6266587577  
 H,0,-0.5525638669,-3.2477973724,-1.5243291269  
 C,0,-7.157321956,-1.3771788652,0.4306780793  
 H,0,-6.6997377375,0.7151071224,0.6065802522  
 C,0,-6.9659091114,0.2717296791,-1.4701359608  
 H,0,-0.3606075765,-4.3294991463,-3.7602957832  
 H,0,-1.7590110815,-3.4084730514,-4.3172397072  
 H,0,-0.2598376429,-2.5751559084,-3.8723385993  
 H,0,-1.8187817071,-5.3721595366,-1.8748156132  
 H,0,-2.6777499962,-4.2916669307,-0.7767637287  
 H,0,-3.2042728486,-4.4463689299,-2.454644013  
 H,0,-8.2366991793,-1.2517059225,0.4814251823  
 H,0,-6.9398725444,-2.2120667975,-0.2326554223  
 H,0,-6.7936931011,-1.622482017,1.4253796683  
 H,0,-8.0395422116,0.4488063438,-1.4771122143  
 H,0,-6.4737814866,1.1828579671,-1.7998632426  
 H,0,-6.7473162646,-0.5285291787,-2.1751361425

**MPW1K/6-31+G\*\* PCM solvent model for dichloromethane**

allylDIPEMPW1KPCMPS

E(RmPW+HF-PW91) = -984.112125325

Zero-point correction= 0.347756  
 (Hartree/Particle)  
 Thermal correction to Energy= 0.369822  
 Thermal correction to Enthalpy= 0.370766  
 Thermal correction to Gibbs Free Energy= 0.292549  
 Sum of electronic and zero-point Energies= -983.764369  
 Sum of electronic and thermal Energies= -983.742304  
 Sum of electronic and thermal Enthalpies= -983.741359  
 Sum of electronic and thermal Free Energies= -983.819576

|       | E (Thermal) | CV             | S              |
|-------|-------------|----------------|----------------|
|       | KCal/Mol    | Cal/Mol-Kelvin | Cal/Mol-Kelvin |
| Total | 232.067     | 78.210         | 164.621        |

C,0,3.5562725932,-1.7273178407,-0.4154708991  
 C,0,4.5744140409,-1.2211207283,0.551396954  
 C,0,5.7056925787,-0.6134138264,0.2152455396  
 B,0,2.1168346714,-1.1562980968,-0.2312321814  
 O,0,1.6581250006,-0.5098957868,0.8840474011  
 C,0,0.348902262,-0.0710946495,0.6426403726  
 C,0,0.3308778861,1.4225893142,0.3793074216  
 O,0,1.2985011917,2.0655431027,0.0722347587  
 O,0,1.1339627964,-1.2883646538,-1.177159758  
 C,0,-0.079447752,-0.8559183488,-0.6255393971  
 C,0,-0.9420283209,-2.047381359,-0.2547887751  
 O,0,-0.5297255849,-3.1720847361,-0.1522628383  
 O,0,-2.1801905287,-1.6581607928,-0.0394666751  
 C,0,-3.1506923102,-2.644140771,0.3832338109  
 C,0,-3.0551834177,-2.8257176256,1.8793973952  
 C,0,-4.491206966,-2.1257222255,-0.0715415974  
 O,0,-0.8962785075,1.883694515,0.4972750892  
 C,0,-1.1377280926,3.2824235484,0.2196103296  
 C,0,-0.8616210594,4.0868877097,1.4675876977  
 C,0,-2.5683566583,3.3728181953,-0.2468942924  
 H,0,-0.2833840564,-0.2799156808,1.5027919135  
 H,0,-0.6221097101,-0.2380548523,-1.340082453  
 H,0,3.8769040596,-1.5595400394,-1.4449939175  
 H,0,3.4562715265,-2.814445164,-0.3103208785  
 H,0,4.353336495,-1.3705416461,1.6040720695  
 H,0,6.4018958546,-0.266603569,0.9657216221  
 H,0,5.9691434153,-0.4390152735,-0.8203796504  
 H,0,-0.4557575118,3.5768310762,-0.5770777586  
 H,0,-2.9070269596,-3.5754682192,-0.1264777813  
 H,0,-1.0423798363,5.1417809616,1.2705507719  
 H,0,-1.5177003281,3.7724889478,2.27745082  
 H,0,0.1717461526,3.9744250452,1.7853576158  
 H,0,-2.806525337,4.4048718245,-0.495364026  
 H,0,-2.7285585112,2.7614352498,-1.1316302073  
 H,0,-3.2505684989,3.0412747819,0.5336344419  
 H,0,-5.2682265732,-2.8384881556,0.196338718  
 H,0,-4.7184039895,-1.1744160005,0.4057458187  
 H,0,-4.5092143812,-1.9880220952,-1.1499377704  
 H,0,-3.7846184561,-3.5646347995,2.2052310001  
 H,0,-2.0681806635,-3.1764951338,2.1704126046  
 H,0,-3.2655585136,-1.8887762023,2.3924416908

**M05/6-31G\***

allylDIPEM05G

E(RM05+HF-M05) = -983.747157125

Zero-point correction= 0.343949  
 (Hartree/Particle)  
 Thermal correction to Energy= 0.366068  
 Thermal correction to Enthalpy= 0.367012  
 Thermal correction to Gibbs Free Energy= 0.289265  
 Sum of electronic and zero-point Energies= -983.403208  
 Sum of electronic and thermal Energies= -983.381089  
 Sum of electronic and thermal Enthalpies= -983.380145  
 Sum of electronic and thermal Free Energies= -983.457892

|       | E (Thermal)<br>KCal/Mol | CV<br>Cal/Mol-Kelvin | S<br>Cal/Mol-Kelvin |
|-------|-------------------------|----------------------|---------------------|
| Total | 229.711                 | 79.172               | 163.633             |

C,0,-0.7012402163,3.3452864138,-0.4179541127  
 B,0,-1.4996504922,2.0124399877,-0.6223241487  
 O,0,-1.9981663696,1.2486366595,0.413800032  
 C,0,-2.8432097049,0.2755499535,-0.1357834834  
 C,0,-4.299540724,0.6994215141,0.0141677059  
 O,0,-5.0937839407,-0.3710539192,-0.0932116528  
 C,0,-6.5295236254,-0.1504716957,-0.0816766658  
 C,0,0.3553491936,3.5948739712,-1.4498792226  
 C,0,1.6482778876,3.7984671277,-1.1970165178  
 O,0,-1.830169556,1.4837809248,-1.8550194566  
 C,0,-2.4519036005,0.24588846,-1.6441304023  
 C,0,-1.4777035171,-0.8945171996,-1.9179418935  
 O,0,-2.1601270474,-2.0359622036,-2.0698726184  
 C,0,-1.3976728917,-3.2606181709,-2.2413473834  
 O,0,-0.2778336352,-0.7807917808,-1.9366186763  
 O,0,-4.6652754751,1.8404103093,0.1540076121  
 H,0,-3.3244936985,0.1387272968,-2.2941190848  
 H,0,-2.6898192406,-0.689466459,0.3525177158  
 H,0,-0.2810370408,3.372305115,0.592059002  
 H,0,-1.4487140044,4.1531322238,-0.4544312613  
 H,0,0.0161420943,3.5897320524,-2.4852540757  
 H,0,2.3642469483,3.9622894972,-1.996861359  
 H,0,2.039465152,3.8030711284,-0.1819096807  
 C,0,-2.2568243769,-4.3716173547,-1.6786217327  
 C,0,-1.0523929901,-3.4324701403,-3.7067318701  
 H,0,-0.4479233027,-3.1508857886,-1.6580727313  
 C,0,-7.1448928518,-1.4214201403,0.460648047  
 H,0,-6.7190512905,0.6881568909,0.5931854952  
 C,0,-6.987537469,0.2077931262,-1.4812500868  
 H,0,-0.489615111,-4.3587854289,-3.8533029851  
 H,0,-1.9603082145,-3.4831452437,-4.3149301243  
 H,0,-0.4358356371,-2.6028451883,-4.0585484061  
 H,0,-1.7231751847,-5.3240212033,-1.7375874033  
 H,0,-2.5033896775,-4.1814426753,-0.6312123309  
 H,0,-3.1906892279,-4.4661467404,-2.2402702572  
 H,0,-8.2313693235,-1.3152801485,0.5217586209  
 H,0,-6.9192216442,-2.2726988818,-0.188087659  
 H,0,-6.7655564413,-1.6412333404,1.4613780071  
 H,0,-8.0712620485,0.3531086108,-1.4966199126  
 H,0,-6.5187741822,1.136107788,-1.815591535  
 H,0,-6.739113798,-0.5909263476,-2.1864595076

#### *p*-anisaldehyde – 5

##### Conformation A, M062X/6-31+G\*\*

anisaldehydeAM06  
 anisaldehyde conf A  
 E(RM062X) = -459.924221249

Zero-point correction= 0.144199 (Hartree/Particle)

Thermal correction to Energy= 0.152933  
 Thermal correction to Enthalpy= 0.153877  
 Thermal correction to Gibbs Free Energy= 0.110385  
 Sum of electronic and ZPE= -459.780022  
 Sum of electronic and thermal Energies= -459.771289  
 Sum of electronic and thermal Enthalpies= -459.770344  
 Sum of electronic and thermal Free Energies= -459.813836

| E        | CV        | S         |
|----------|-----------|-----------|
| KCal/Mol | Cal/Mol-K | Cal/Mol-K |
| Total    | 95.967    | 32.737    |

C,0,-0.0037521555,0.,0.1186513237  
 C,0,0.0539226945,0.,1.5157940835  
 C,0,1.3008635493,0.,2.1389002924  
 C,0,2.4769995815,0.,1.3933944016  
 C,0,2.4055845275,0.,-0.008959121  
 C,0,1.1789392333,0.,-0.6417443993  
 H,0,-0.8476917089,0.,2.1156279629  
 H,0,1.3549193741,0.,3.2254489302  
 C,0,3.7828269424,0.,2.0817193968  
 H,0,3.3306542839,0.,-0.5777416455  
 H,0,1.0928032377,0.,-1.722975718  
 O,0,-1.1529133387,0.,-0.5944940574  
 C,0,-2.3783481722,0.,0.1139100206  
 H,0,-3.1613103504,0.,-0.6428526441  
 H,0,-2.4713127034,-0.895949944,0.7380585904  
 H,0,-2.4713127034,0.895949944,0.7380585904  
 O,0,4.8559658063,0.,1.519055221  
 H,0,3.7295429019,0.,3.1908607719

##### Conformation A, M062X/6-31+G\*\*/PCM

anisaldehydeAM06PCM  
 anisaldehyde conf A  
 E(RM062X) = -459.932432920

Zero-point correction= 0.144031 (Hartree/Particle)  
 Thermal correction to Energy= 0.152802  
 Thermal correction to Enthalpy= 0.153746  
 Thermal correction to Gibbs Free Energy= 0.110174  
 Sum of electronic and ZPE= -459.788402  
 Sum of electronic and thermal Energies= -459.779631  
 Sum of electronic and thermal Enthalpies= -459.778687  
 Sum of electronic and thermal Free Energies= -459.822259

| E        | CV        | S         |
|----------|-----------|-----------|
| KCal/Mol | Cal/Mol-K | Cal/Mol-K |
| Total    | 95.885    | 32.838    |

C,0,-0.0024249303,0.,0.1165396207  
 C,0,0.0554694053,0.,1.5148654729  
 C,0,1.3017680509,0.,2.1373269611  
 C,0,2.4798626842,0.,1.3902962783  
 C,0,2.4079513054,0.,-0.0133736443  
 C,0,1.1810201357,0.,-0.6456212768  
 H,0,-0.8455904355,0.,2.115194996  
 H,0,1.3547252653,0.,3.2234590629  
 C,0,3.7758439197,0.,2.085805219  
 H,0,3.3282034854,0.,-0.5897540821  
 H,0,1.0987714766,0.,-1.7273029775  
 O,0,-1.150768873,0.,-0.5935958611  
 C,0,-2.3812965352,0.,0.1191530363  
 H,0,-3.1635307971,0.,-0.6375292849  
 H,0,-2.4702138331,-0.8960449061,0.7415093652  
 H,0,-2.4702138331,0.8960449061,0.7415093652

O,0,4.8597403587,0.,1.5305039674  
 H,0,3.7170641501,0.,3.1917257821

**Conformation B, M062X/6-31+G\*\***

anialdehydeBM06  
 anialdehyde conf B  
 E(RM062X) = -459.924116814

Zero-point correction= 0.143772 (Hartree/Particle)  
 Thermal correction to Energy= 0.152611  
 Thermal correction to Enthalpy= 0.153556  
 Thermal correction to Gibbs Free Energy= 0.109664  
 Sum of electronic and ZPE= -459.780345  
 Sum of electronic and thermal Energies= -459.771505  
 Sum of electronic and thermal Enthalpies= -459.770561  
 Sum of electronic and thermal Free Energies= -459.814453

| E            | CV        | S         |
|--------------|-----------|-----------|
| KCal/Mol     | Cal/Mol-K | Cal/Mol-K |
| Total 95.765 | 32.884    | 92.377    |

C,0,-0.0025165611,0.,0.116468798  
 C,0,0.0543430715,0.,1.5173381072  
 C,0,1.2931447998,0.,2.147978541  
 C,0,2.4733015274,0.,1.4025854906  
 C,0,2.4030137899,0.,0.0038984919  
 C,0,1.1778782948,0.,-0.639979427  
 H,0,-0.8505718772,0.,2.1126055503  
 H,0,1.3627682804,0.,3.2320107351  
 C,0,3.7872812202,0.,2.0759046213  
 H,0,3.3206025231,0.,-0.5802943812  
 H,0,1.0980264349,0.,-1.721564172  
 O,0,-1.1522953108,0.,-0.5958387101  
 C,0,-2.3788641018,0.,0.1115898208  
 H,0,-3.1604619411,0.,-0.6466267298  
 H,0,-2.4733076121,-0.8959233956,0.7355471612  
 H,0,-2.4733076121,0.8959233956,0.7355471612  
 O,0,3.944387959,0.,3.2773627524  
 H,0,4.6642001136,0.,1.3948621893

**Conformation B, M062X/6-31+G\*\*/PCM**

anialdehydeBM06PCM  
 anialdehyde conf B  
 E(RM062X) = -459.932187405

Zero-point correction= 0.143658 (Hartree/Particle)  
 Thermal correction to Energy= 0.152521  
 Thermal correction to Enthalpy= 0.153465  
 Thermal correction to Gibbs Free Energy= 0.109537  
 Sum of electronic and ZPE= -459.788529  
 Sum of electronic and thermal Energies= -459.779666  
 Sum of electronic and thermal Enthalpies= -459.778722  
 Sum of electronic and thermal Free Energies= -459.822651

| E            | CV        | S         |
|--------------|-----------|-----------|
| KCal/Mol     | Cal/Mol-K | Cal/Mol-K |
| Total 95.708 | 32.957    | 92.455    |

C,0,-0.0013640658,0.,0.116042051  
 C,0,0.0521638259,0.,1.5185415556  
 C,0,1.2897465865,0.,2.1501136661  
 C,0,2.4733095825,0.,1.4061254485  
 C,0,2.4059915729,0.,0.005585956  
 C,0,1.1814093891,0.,-0.6391548467  
 H,0,-0.8535870545,0.,2.1121104867

H,0,1.3488913963,0.,3.2346071802  
 C,0,3.7867627504,0.,2.0688875787  
 H,0,3.3235661101,0.,-0.5778027297  
 H,0,1.1080782896,0.,-1.7213649287  
 O,0,-1.1492158283,0.,-0.5951452003  
 C,0,-2.3821803926,0.,0.1139268221  
 H,0,-3.1615617058,0.,-0.6457521632  
 H,0,-2.4740699039,-0.8961228929,0.7358676169  
 H,0,-2.4740699039,0.8961228929,0.7358676169  
 O,0,3.9551191481,0.,3.2749419227  
 H,0,4.6586332033,0.,1.3859979675

**B3LYP/6-31G\***

panialdehydeB3G  
 E(RB+HF-LYP) = -460.098688151

Zero-point correction= 0.143121 (Hartree/Particle)  
 Thermal correction to Energy= 0.151928  
 Thermal correction to Enthalpy= 0.152872  
 Thermal correction to Gibbs Free Energy= 0.109205  
 Sum of electronic and zero-point Energies= -459.955567  
 Sum of electronic and thermal Energies= -459.946760  
 Sum of electronic and thermal Enthalpies= -459.945816  
 Sum of electronic and thermal Free Energies= -459.989484

|       | E (Thermal) | CV             | S              |
|-------|-------------|----------------|----------------|
|       | KCal/Mol    | Cal/Mol-Kelvin | Cal/Mol-Kelvin |
| Total | 95.336      | 32.932         | 91.906         |

C,0,-0.0045316639,0.,0.1231946683  
 C,0,0.0602484416,0.,1.524462398  
 C,0,1.3072357013,0.,2.1468716703  
 C,0,2.4895169191,0.,1.3995633237  
 C,0,2.409355964,0.,-0.0061454086  
 C,0,1.1805070645,0.,-0.6387417483  
 H,0,-0.8417148657,0.,2.1250274946  
 H,0,1.362017515,0.,3.2338094731  
 C,0,3.7968937677,0.,2.0775236045  
 H,0,3.3327218413,0.,-0.5772949909  
 H,0,1.0966788095,0.,-1.7209004284  
 O,0,-1.1574730448,0.,-0.5932926917  
 C,0,-2.395418273,0.,0.1051961473  
 H,0,-3.1701790568,0.,-0.6630703597  
 H,0,-2.5027749578,-0.8954555693,0.7304821493  
 H,0,-2.5027749578,0.8954555693,0.7304821493  
 O,0,4.8766891455,0.,1.513624823  
 H,0,3.7393816389,0.,3.1899197379

**Conformation A, B3LYP/6-31+G\*\***

panialdehydeB3+G  
 E(RB+HF-LYP) = -460.129560795

Zero-point correction= 0.142307 (Hartree/Particle)  
 Thermal correction to Energy= 0.151184  
 Thermal correction to Enthalpy= 0.152129  
 Thermal correction to Gibbs Free Energy= 0.108295  
 Sum of electronic and zero-point Energies= -459.987254  
 Sum of electronic and thermal Energies= -459.978376  
 Sum of electronic and thermal Enthalpies= -459.977432  
 Sum of electronic and thermal Free Energies= -460.021265

| E (Thermal) | CV             | S              |
|-------------|----------------|----------------|
| KCal/Mol    | Cal/Mol-Kelvin | Cal/Mol-Kelvin |

Total 94.870 33.150 92.255

C,0,-0.0040275267,0.,0.1235798126  
 C,0,0.0620113895,0.,1.5250835443  
 C,0,1.3122548656,0.,2.1456702538  
 C,0,2.4946782319,0.,1.3961793487  
 C,0,2.4117190162,0.,-0.0114102216  
 C,0,1.1802892562,0.,-0.6415454972  
 H,0,-0.837351753,0.,2.1285546397  
 H,0,1.3672507749,0.,3.2320582116  
 C,0,3.797247505,0.,2.0832013925  
 H,0,3.3316268155,0.,-0.5876129673  
 H,0,1.0957750474,0.,-1.7233041608  
 O,0,-1.1600871274,0.,-0.5902889921  
 C,0,-2.4036015581,0.,0.1065237859  
 H,0,-3.1735423449,0.,-0.6652376593  
 H,0,-2.5097686789,-0.8966042985,0.7287318802  
 H,0,-2.5097686789,0.8966042985,0.7287318802  
 O,0,4.8847739956,0.,1.5282060192  
 H,0,3.7369017702,0.,3.1935907297

### Conformation B, B3LYP/6-31+G\*\*

panisaldehydeConfBB3PS  
 anisaldehyde conf B  
 E(RB3LYP) = -460.129482763

Zero-point correction= 0.142271 (Hartree/Particle)  
 Thermal correction to Energy= 0.151164  
 Thermal correction to Enthalpy= 0.152108  
 Thermal correction to Gibbs Free Energy= 0.108201  
 Sum of electronic and ZPE= -459.987212  
 Sum of electronic and thermal Energies= -459.978319  
 Sum of electronic and thermal Enthalpies= -459.977375  
 Sum of electronic and thermal Free Energies= -460.021282

E CV S  
 KCal/Mol Cal/Mol-K Cal/Mol-K  
 Total 94.857 33.170 92.410

C,0,-0.0029023209,0.,0.1217643785  
 C,0,0.0593648757,0.,1.5273311418  
 C,0,1.2999637323,0.,2.1582227699  
 C,0,2.4878949799,0.,1.4118971995  
 C,0,2.4094802181,0.,0.0071411856  
 C,0,1.1809830004,0.,-0.6367413174  
 H,0,-0.8442938005,0.,2.1247612056  
 H,0,1.3660415854,0.,3.2419182894  
 C,0,3.8032584533,0.,2.0749806811  
 H,0,3.3246712411,0.,-0.5805425745  
 H,0,1.1051434352,0.,-1.718933991  
 O,0,-1.1583713613,0.,-0.5932651483  
 C,0,-2.4038088373,0.,0.1015700531  
 H,0,-3.1717865054,0.,-0.6721550459  
 H,0,-2.5116734877,-0.8964631187,0.7234725743  
 H,0,-2.5116734877,0.8964631187,0.7234725743  
 O,0,3.9826957792,0.,3.2827910993  
 H,0,4.6726355002,0.,1.3817109247

### Conformation A, B3LYP/6-31+G\*\*/PCM

panisaldehydeConfAB3PSPCM  
 anisaldehyde conf A  
 E(RB3LYP) = -460.138108888

Zero-point correction= 0.142215 (Hartree/Particle)  
 Thermal correction to Energy= 0.151124

Thermal correction to Enthalpy= 0.152068  
 Thermal correction to Gibbs Free Energy= 0.108167  
 Sum of electronic and ZPE= -459.995894  
 Sum of electronic and thermal Energies= -459.986985  
 Sum of electronic and thermal Enthalpies= -459.986041  
 Sum of electronic and thermal Free Energies= -460.029942

E CV S  
 KCal/Mol Cal/Mol-K Cal/Mol-K  
 Total 94.832 33.238 92.398

C,0,-0.0029945149,0.,0.1212937053  
 C,0,0.0640240908,0.,1.5242173334  
 C,0,1.3131509101,0.,2.1434286647  
 C,0,2.4983135887,0.,1.3924528382  
 C,0,2.4141869571,0.,-0.0167418431  
 C,0,1.1825698325,0.,-0.6455267685  
 H,0,-0.8344645428,0.,2.1283625301  
 H,0,1.3672854174,0.,3.2293025483  
 C,0,3.7887461372,0.,2.0871163036  
 H,0,3.3287847313,0.,-0.6011457182  
 H,0,1.1012333842,0.,-1.7276096938  
 O,0,-1.1572005412,0.,-0.5888670891  
 C,0,-2.4072058407,0.,0.112596599  
 H,0,-3.1756341135,0.,-0.659623127  
 H,0,-2.5079454971,-0.8969133911,0.7324704079  
 H,0,-2.5079454971,0.8969133911,0.7324704079  
 O,0,4.8898590984,0.,1.5427216208  
 H,0,3.7216173997,0.,3.1937932808

### Conformation B, B3LYP/6-31+G\*\*/PCM

panisaldehydeConfBB3PSPCM  
 anisaldehyde conf B  
 E(RB3LYP) = -460.137894101

Zero-point correction= 0.142246 (Hartree/Particle)  
 Thermal correction to Energy= 0.151156  
 Thermal correction to Enthalpy= 0.152101  
 Thermal correction to Gibbs Free Energy= 0.108160  
 Sum of electronic and ZPE= -459.995648  
 Sum of electronic and thermal Energies= -459.986738  
 Sum of electronic and thermal Enthalpies= -459.985794  
 Sum of electronic and thermal Free Energies= -460.029734

E CV S  
 KCal/Mol Cal/Mol-K Cal/Mol-K  
 Total 94.852 33.229 92.480

C,0,-0.0019570808,0.,0.1217069695  
 C,0,0.0574108322,0.,1.529115139  
 C,0,1.2962126454,0.,2.160963441  
 C,0,2.4881719621,0.,1.4163623198  
 C,0,2.4122342701,0.,0.0091976226  
 C,0,1.1848804924,0.,-0.6353089128  
 H,0,-0.8469885155,0.,2.1247148039  
 H,0,1.3511797984,0.,3.2450668511  
 C,0,3.8019491494,0.,2.0669728484  
 H,0,3.3272810859,0.,-0.5777472062  
 H,0,1.1151556797,0.,-1.7179746957  
 O,0,-1.1542992222,0.,-0.5918305819  
 C,0,-2.4079706259,0.,0.1037264814  
 H,0,-3.1721773687,0.,-0.6726967529  
 H,0,-2.5126653402,-0.8968518836,0.7229746851  
 H,0,-2.5126653402,0.8968518836,0.7229746851  
 O,0,3.9965448474,0.,3.2797988329

H,0,4.6653257308,0.,1.3713794699

**MPW1K/6-31+G\*\***

panisaldehydeMPW1K+G

E(RmPW+HF-PW91) = -459.978576850

Zero-point correction= 0.147048  
(Hartree/Particle)  
Thermal correction to Energy= 0.155718  
Thermal correction to Enthalpy= 0.156662  
Thermal correction to Gibbs Free Energy= 0.113230  
Sum of electronic and zero-point Energies= -459.831528  
Sum of electronic and thermal Energies= -459.822859  
Sum of electronic and thermal Enthalpies= -459.821915  
Sum of electronic and thermal Free Energies= -459.865347

|       | E (Thermal)<br>KCal/Mol | CV<br>Cal/Mol-Kelvin | S<br>Cal/Mol-Kelvin |
|-------|-------------------------|----------------------|---------------------|
| Total | 97.714                  | 32.175               | 91.410              |

C,0,-0.0013645881,0.,0.1251368562  
C,0,0.060891945,0.,1.515090551  
C,0,1.3015356807,0.,2.1334966219  
C,0,2.4738221279,0.,1.3916991155  
C,0,2.3964899378,0.,-0.0041762862  
C,0,1.1753332487,0.,-0.6319334411  
H,0,-0.835150516,0.,2.1134855846  
H,0,1.3541179444,0.,3.2140769249  
C,0,3.770488221,0.,2.0730726453  
H,0,3.3139403259,0.,-0.5734926611  
H,0,1.0918214249,0.,-1.7076231023  
O,0,-1.1431293628,0.,-0.5780228951  
C,0,-2.3645392414,0.,0.1142764073  
H,0,-3.1383789669,0.,-0.6443188689  
H,0,-2.46802875,-0.8908634596,0.7334812589  
H,0,-2.46802875,0.8908634596,0.7334812589  
O,0,4.840482366,0.,1.517376738  
H,0,3.7160769533,0.,3.175606293

**MPW1K/6-31+G\*\* PCM solvent model for dichloromethane**

anisaldehydeMPW1KPCM+G

E(RmPW+HF-PW91) = -459.991098271

Zero-point correction= 0.146301  
(Hartree/Particle)  
Thermal correction to Energy= 0.154991  
Thermal correction to Enthalpy= 0.155935  
Thermal correction to Gibbs Free Energy= 0.112471  
Sum of electronic and zero-point Energies= -459.844798  
Sum of electronic and thermal Energies= -459.836108  
Sum of electronic and thermal Enthalpies= -459.835164  
Sum of electronic and thermal Free Energies= -459.878627

|       | E (Thermal)<br>KCal/Mol | CV<br>Cal/Mol-Kelvin | S<br>Cal/Mol-Kelvin |
|-------|-------------------------|----------------------|---------------------|
| Total | 97.258                  | 32.258               | 91.476              |

C,0,0.0001872745,0.,0.1243311077  
C,0,0.0636719042,0.,1.5157928884  
C,0,1.3044700625,0.,2.1320294068  
C,0,2.4777685971,0.,1.3864151788  
C,0,2.3989742567,0.,-0.0114751275  
C,0,1.1766732577,0.,-0.6366130632  
H,0,-0.8293981661,0.,2.1213496542  
H,0,1.3581043275,0.,3.2153174975

C,0,3.7608452169,0.,2.0789218424  
H,0,3.3114716653,0.,-0.5941214836  
H,0,1.095367145,0.,-1.7158617228  
O,0,-1.1409623288,0.,-0.5763612353  
C,0,-2.3680367215,0.,0.1177582443  
H,0,-3.1402494229,0.,-0.6425732374  
H,0,-2.4682580493,-0.8910059283,0.7362326053  
H,0,-2.4682580493,0.8910059283,0.7362326053  
O,0,4.8456340789,0.,1.5330982048  
H,0,3.6983765481,0.,3.1802366394

**M05/6-31G\***

panisaldehydeM05G

E(RM05+HF-M05) = -459.795289529

Zero-point correction= 0.143941  
(Hartree/Particle)  
Thermal correction to Energy= 0.152792  
Thermal correction to Enthalpy= 0.153736  
Thermal correction to Gibbs Free Energy= 0.109955  
Sum of electronic and zero-point Energies= -459.651349  
Sum of electronic and thermal Energies= -459.642498  
Sum of electronic and thermal Enthalpies= -459.641553  
Sum of electronic and thermal Free Energies= -459.685334

|       | E (Thermal)<br>KCal/Mol | CV<br>Cal/Mol-Kelvin | S<br>Cal/Mol-Kelvin |
|-------|-------------------------|----------------------|---------------------|
| Total | 95.878                  | 32.988               | 92.144              |

C,0,-0.0068412748,0.,0.1282590666  
C,0,0.0604916645,0.,1.5275569555  
C,0,1.3061943964,0.,2.1464072548  
C,0,2.4852097505,0.,1.4007304467  
C,0,2.4023265532,0.,-0.0013230864  
C,0,1.1765139384,0.,-0.6328596253  
H,0,-0.8393260123,0.,2.1309488257  
H,0,1.3593482355,0.,3.2329030844  
C,0,3.795598741,0.,2.0703831959  
H,0,3.325547797,0.,-0.5717708926  
H,0,1.0920800786,0.,-1.714509094  
O,0,-1.1518901483,0.,-0.5811773904  
C,0,-2.3859029973,0.,0.1011886679  
H,0,-3.1551630721,0.,-0.670875184  
H,0,-2.4974484142,-0.8944570298,0.7246254979  
H,0,-2.4974484142,0.8944570298,0.7246254979  
O,0,4.8676560252,0.,1.5027824528  
H,0,3.7394331528,0.,3.1828153265

**MP2/6-31G\***

anisaldehydeMP2

E(RHF) = -457.310868765

Zero-point correction= 0.143518  
(Hartree/Particle)  
Thermal correction to Energy= 0.152612  
Thermal correction to Enthalpy= 0.153557  
Thermal correction to Gibbs Free Energy= 0.109303  
Sum of electronic and zero-point Energies= -458.532401  
Sum of electronic and thermal Energies= -458.523307  
Sum of electronic and thermal Enthalpies= -458.522363  
Sum of electronic and thermal Free Energies= -458.566616

|       | E (Thermal)<br>KCal/Mol | CV<br>Cal/Mol-Kelvin | S<br>Cal/Mol-Kelvin |
|-------|-------------------------|----------------------|---------------------|
| Total | 95.766                  | 33.844               | 93.139              |

C,0,-0.0049389874,0.,0.1209604005  
 C,0,0.0530664629,0.,1.5198572363  
 C,0,1.3005969425,0.,2.1468258107  
 C,0,2.4794292952,0.,1.398569643  
 C,0,2.4105699829,0.,-0.0044124132  
 C,0,1.1794723243,0.,-0.6373610293  
 H,0,-0.8481655589,0.,2.1230598507  
 H,0,1.351760233,0.,3.2351549135  
 C,0,3.7864553798,0.,2.0807407184  
 H,0,3.3358362067,0.,-0.575009233  
 H,0,1.0944905782,0.,-1.7205953826  
 O,0,-1.1571445794,0.,-0.6119846185  
 C,0,-2.3870276421,0.,0.1110504325  
 H,0,-3.16725141,0.,-0.6488343907  
 H,0,-2.4804797107,-0.8953119177,0.7346134554  
 H,0,-2.4804797107,0.8953119177,0.7346134554  
 O,0,4.8703423977,0.,1.5029013448  
 H,0,3.7398477958,0.,3.1905608061

### Allylboronate model for 4 lacking ester groups used for POLYRATE calculations

#### B3LYP/6-31+G\*\*

allylBegB3PS

E(RB+HF-LYP) = -371.349900373

|                                              |             |
|----------------------------------------------|-------------|
| Zero-point correction=                       | 0.140647    |
| (Hartree/Particle)                           |             |
| Thermal correction to Energy=                | 0.149011    |
| Thermal correction to Enthalpy=              | 0.149955    |
| Thermal correction to Gibbs Free Energy=     | 0.106144    |
| Sum of electronic and zero-point Energies=   | -371.209253 |
| Sum of electronic and thermal Energies=      | -371.200890 |
| Sum of electronic and thermal Enthalpies=    | -371.199946 |
| Sum of electronic and thermal Free Energies= | -371.243756 |

|       | E (Thermal) | CV             | S              |
|-------|-------------|----------------|----------------|
|       | KCal/Mol    | Cal/Mol-Kelvin | Cal/Mol-Kelvin |
| Total | 93.506      | 29.020         | 92.207         |

C,0,-0.5849415633,2.7125040872,-0.1914324753  
 C,0,-0.1359230902,1.3028889002,-0.4764661648  
 C,0,-0.916174726,0.3253673436,-0.9489651839  
 B,0,0.205240456,3.8135313075,-0.9950009859  
 O,0,1.5576005713,3.755449397,-1.2437115497  
 C,0,1.9148261621,4.8901259518,-2.0565252165  
 C,0,0.6539003929,5.7873191474,-2.0484852241  
 O,0,-0.3823640813,4.9528582139,-1.4948215065  
 H,0,0.7700187848,6.6688925909,-1.4086942855  
 H,0,2.7913777616,5.3791058136,-1.622831892  
 H,0,0.3534336589,6.1134648346,-3.0478392162  
 H,0,-1.6603123628,2.8237881012,-0.3705869993  
 H,0,-0.426541983,2.9326393989,0.8777986211  
 H,0,0.9167078194,1.0919369921,-0.2884839978  
 H,0,-0.5245567253,-0.6689821648,-1.1432344697  
 H,0,-1.9719010198,0.4867193104,-1.1574388228  
 H,0,2.1697379448,4.5326937747,-3.060065631

#### B3LYP/6-31+G\*\*

allylBegB3PSPCM

allylBeg

E(RB3LYP) = -371.355522058

Zero-point correction= 0.140426 (Hartree/Particle)

Thermal correction to Energy= 0.148821  
 Thermal correction to Enthalpy= 0.149765  
 Thermal correction to Gibbs Free Energy= 0.105701  
 Sum of electronic and ZPE= -371.215096  
 Sum of electronic and thermal Energies= -371.206701  
 Sum of electronic and thermal Enthalpies= -371.205757  
 Sum of electronic and thermal Free Energies= -371.249821

|       | E        | CV        | S         |
|-------|----------|-----------|-----------|
|       | KCal/Mol | Cal/Mol-K | Cal/Mol-K |
| Total | 93.386   | 29.146    | 92.740    |

C,0,-0.6303163524,2.7188800816,-0.2360144756  
 C,0,-0.1400468856,1.3076659159,-0.4200552593  
 C,0,-0.8584262137,0.2981098074,-0.9256271314  
 B,0,0.1858725413,3.8133079901,-1.0254122303  
 O,0,1.5150488613,3.6966182294,-1.3590312455  
 C,0,1.8898998875,4.8640259342,-2.1292134028  
 C,0,0.6923704647,5.8277543296,-1.9802998024  
 O,0,-0.3650926833,5.0099457835,-1.4238568552  
 H,0,0.8978538912,6.646814954,-1.2844736139  
 H,0,2.8193202722,5.2728171976,-1.7269035273  
 H,0,0.3573746442,6.242695462,-2.9333913516  
 H,0,-1.6930636057,2.7986610776,-0.4943368116  
 H,0,-0.5569658026,2.99309722,0.8297817158  
 H,0,0.8903958961,1.11725355,-0.1190122995  
 H,0,-0.4368434762,-0.6967826797,-1.0393951053  
 H,0,-1.8902962116,0.43490892,-1.2436368514  
 H,0,2.0530427727,4.5545292269,-3.1659067525

#### MPW1K/6-31+G\*\*

allylBegMPW1KPS

E(RmPW+HF-PW91) = -371.233287098

|                                              |             |
|----------------------------------------------|-------------|
| Zero-point correction=                       | 0.145239    |
| (Hartree/Particle)                           |             |
| Thermal correction to Energy=                | 0.153428    |
| Thermal correction to Enthalpy=              | 0.154372    |
| Thermal correction to Gibbs Free Energy=     | 0.110988    |
| Sum of electronic and zero-point Energies=   | -371.088049 |
| Sum of electronic and thermal Energies=      | -371.079859 |
| Sum of electronic and thermal Enthalpies=    | -371.078915 |
| Sum of electronic and thermal Free Energies= | -371.122299 |

|       | E (Thermal) | CV             | S              |
|-------|-------------|----------------|----------------|
|       | KCal/Mol    | Cal/Mol-Kelvin | Cal/Mol-Kelvin |
| Total | 96.277      | 28.102         | 91.308         |

C,0,-0.6060242698,2.7246434632,-0.2179820865  
 C,0,-0.128478501,1.3317906194,-0.4673867886  
 C,0,-0.8754695856,0.3429948147,-0.9411625867  
 B,0,0.1911059011,3.815098933,-1.0093007722  
 O,0,1.5283238547,3.7391189409,-1.2689367303  
 C,0,1.8849551833,4.8508812381,-2.0717657251  
 C,0,0.6651947728,5.7761889275,-2.0088472985  
 O,0,-0.3708665828,4.9632122689,-1.4853859082  
 H,0,0.8207209226,6.6207881295,-1.3389149293  
 H,0,2.7870896397,5.3093920142,-1.6753350671  
 H,0,0.3692176835,6.1559309612,-2.9831572303  
 H,0,-1.6700671082,2.8182520425,-0.4306708072  
 H,0,-0.4837102341,2.964063574,0.8442868424  
 H,0,0.9164602598,1.1419111953,-0.2526357982  
 H,0,-0.4643482329,-0.6410850163,-1.1102342132  
 H,0,-1.9217665381,0.4855865177,-1.1761878325  
 H,0,2.0877908351,4.5015343763,-3.0831680686

**MPW1K/6-31+G\*\* PCM solvent model for dichloromethane**  
 allylBegMPW1KPCPCM  
 E(RmPW+HF-PW91) = -371.240747612

Zero-point correction= 0.144553  
 (Hartree/Particle)  
 Thermal correction to Energy= 0.152776  
 Thermal correction to Enthalpy= 0.153720  
 Thermal correction to Gibbs Free Energy= 0.110116  
 Sum of electronic and zero-point Energies= -371.096194  
 Sum of electronic and thermal Energies= -371.087972  
 Sum of electronic and thermal Enthalpies= -371.087027  
 Sum of electronic and thermal Free Energies= -371.130631

|       | E (Thermal) | CV             | S              |
|-------|-------------|----------------|----------------|
|       | KCal/Mol    | Cal/Mol-Kelvin | Cal/Mol-Kelvin |
| Total | 95.868      | 28.250         | 91.772         |

C,0,-0.634865608,2.7255233152,-0.2592882072  
 C,0,-0.132508205,1.3301683981,-0.429190313  
 C,0,-0.8420706534,0.3177690065,-0.9143932062  
 B,0,0.1809811541,3.8112627207,-1.0390062666  
 O,0,1.5046832883,3.7035883191,-1.3509510196  
 C,0,1.8692494104,4.8425122329,-2.1243114974  
 C,0,0.6946450119,5.8069661914,-1.9586565465  
 O,0,-0.3595030019,4.996586627,-1.4484336767  
 H,0,0.9064178771,6.5961001051,-1.238707189  
 H,0,2.8060098656,5.2478448538,-1.7514313798  
 H,0,0.3817946082,6.2585365104,-2.8962205927  
 H,0,-1.6891641855,2.7968474934,-0.5283206073  
 H,0,-0.5721668352,3.008012822,0.7985959751  
 H,0,0.8977385688,1.1529851864,-0.1349896129  
 H,0,-0.4144864531,-0.6694285244,-1.0192187619  
 H,0,-1.8719549601,0.4448306208,-1.2236896556  
 H,0,2.0053281178,4.5301971215,-3.1585724428

**MP2/6-31G\***  
 allylBegMP2  
 E(RHF) = -369.065970403

Zero-point correction= 0.144062  
 (Hartree/Particle)  
 Thermal correction to Energy= 0.152294  
 Thermal correction to Enthalpy= 0.153238  
 Thermal correction to Gibbs Free Energy= 0.109608  
 Sum of electronic and zero-point Energies= -369.986160  
 Sum of electronic and thermal Energies= -369.977929  
 Sum of electronic and thermal Enthalpies= -369.976985  
 Sum of electronic and thermal Free Energies= -370.020615

|       | E (Thermal) | CV             | S              |
|-------|-------------|----------------|----------------|
|       | KCal/Mol    | Cal/Mol-Kelvin | Cal/Mol-Kelvin |
| Total | 95.566      | 28.431         | 91.828         |

C,0,-0.4845250621,2.7159821499,0.0029858878  
 C,0,-0.1132618776,1.3555833357,-0.522831085  
 C,0,-0.9641405394,0.5105633402,-1.1190924273  
 B,0,0.2343061898,3.8183331108,-0.8556048199  
 O,0,1.609220083,3.9258796109,-0.9192565181  
 C,0,1.9063515424,4.8928318603,-1.9473329476  
 C,0,0.5757080122,5.6204612407,-2.1886452899  
 O,0,-0.4261016725,4.7372293364,-1.6420962973  
 H,0,0.5227570466,6.5759039053,-1.6570565413  
 H,0,2.702517559,5.5545636727,-1.5980699698

H,0,0.3627881828,5.7906213117,-3.2466059106  
 H,0,-1.5696321218,2.8554015503,-0.026679905  
 H,0,-0.1620569715,2.810236867,1.0481827778  
 H,0,0.9347503285,1.0746409401,-0.4241099186  
 H,0,-0.6357104005,-0.4505338854,-1.5010757275  
 H,0,-2.0158706654,0.7543694607,-1.2419618888  
 H,0,2.2530283663,4.3582351929,-2.8375344188

**Allylboronate model for TS 7 lacking ester groups used for POLYRATE calculations**

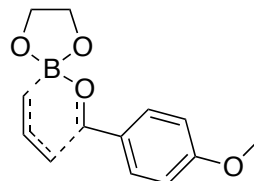

**M062X/6-31+G\*\***

This structure was optimized with the Gaussian options  
 int(grid=ultrafine) and nosymm.  
 anisaldehydeAllylBegTSM062X  
 ts for allylboronation  
 E(RM062X) = -831.100052631

Zero-point correction= 0.288911 (Hartree/Particle)  
 Thermal correction to Energy= 0.305120  
 Thermal correction to Enthalpy= 0.306064  
 Thermal correction to Gibbs Free Energy= 0.244559  
 Sum of electronic and ZPE= -830.811141  
 Sum of electronic and thermal Energies= -830.794933  
 Sum of electronic and thermal Enthalpies= -830.793989  
 Sum of electronic and thermal Free Energies= -830.855494

|       | E        | CV        | S         |
|-------|----------|-----------|-----------|
|       | KCal/Mol | Cal/Mol-K | Cal/Mol-K |
| Total | 191.465  | 63.095    | 129.447   |

C,0,3.4558498119,2.2470743655,-2.522363604  
 C,0,2.2375466194,2.1117307439,-3.1825147007  
 C,0,2.1485977843,2.3007950642,-4.5616736832  
 C,0,3.3049354422,2.6278869048,-5.2841193556  
 C,0,4.5215108083,2.7667531197,-4.641296171  
 C,0,4.6024059923,2.5782730951,-3.2536993664  
 C,0,0.8665322021,2.1428415645,-5.2650887088  
 O,0,-0.1146681625,1.6051604517,-4.6377364227  
 B,0,-1.4703689984,1.5843685897,-5.3241908552  
 C,0,-1.9643416003,3.2310905331,-5.1573549876  
 C,0,-0.9373056464,3.941622607,-5.8621956044  
 C,0,0.2763076259,4.2591798598,-5.3065498989  
 O,0,5.8332804252,2.7340074843,-2.7116114752  
 O,0,-2.3748211701,0.6948526734,-4.6822679149  
 C,0,-2.4403945376,-0.4579107901,-5.503375605  
 C,0,-2.1828488605,0.0830012185,-6.9149448537  
 O,0,-1.3204202703,1.1892946631,-6.7052013874  
 H,0,-3.4180674456,-0.9360551058,-5.3943117372  
 H,0,-3.1175229098,0.4233353034,-7.3827746249  
 H,0,-1.6587022627,-1.1756338552,-5.2132450015  
 H,0,-2.0263543865,3.4360916835,-4.0876328686  
 H,0,-2.9427883345,3.2341866218,-5.6386372544  
 H,0,-1.0347610169,4.0095450097,-6.9458588705  
 H,0,1.0559022093,4.7288812043,-5.89859614  
 H,0,0.3796102596,4.3274639307,-4.2270319486  
 H,0,0.8871113094,2.0471351658,-6.3531956193  
 H,0,-1.7043743693,-0.6474770785,-7.5748277891  
 H,0,3.2438316822,2.7729248344,-6.3601204221

H,0,5.4275817996,3.0160416508,-5.182515778  
 H,0,3.5012818698,2.0896167516,-1.451789542  
 H,0,1.3419780752,1.8457553319,-2.6293722742  
 C,0,5.9736935585,2.5516609723,-1.3154058057  
 H,0,7.0265462106,2.7220788234,-1.0958960724  
 H,0,5.3623869173,3.2723824347,-0.7605646176  
 H,0,5.6984643678,1.5324051732,-1.0216620392

### M062X/6-31+G\*\*/PCM

This structure was optimized with the Gaussian options  
 int(grid=ultrafine) and nosymm.  
 anisaldehydeAllylBegTSM062XPCM  
 ts for allylboration  
 E(RM062X) = -831.111740287

Zero-point correction= 0.288645 (Hartree/Particle)  
 Thermal correction to Energy= 0.304844  
 Thermal correction to Enthalpy= 0.305788  
 Thermal correction to Gibbs Free Energy= 0.244287  
 Sum of electronic and ZPE= -830.823095  
 Sum of electronic and thermal Energies= -830.806896  
 Sum of electronic and thermal Enthalpies= -830.805952  
 Sum of electronic and thermal Free Energies= -830.867454

| E             | CV        | S         |
|---------------|-----------|-----------|
| KCal/Mol      | Cal/Mol-K | Cal/Mol-K |
| Total 191.292 | 63.132    | 129.441   |

C,0,3.4542717365,2.259391266,-2.525316977  
 C,0,2.2351275063,2.1392246469,-3.1859878933  
 C,0,2.1489392723,2.3234376069,-4.5671967858  
 C,0,3.3087732069,2.6365902782,-5.2914687342  
 C,0,4.5270078568,2.7604247143,-4.6475743712  
 C,0,4.605949554,2.5728150768,-3.25885501  
 C,0,0.8692477417,2.1808564767,-5.2764798816  
 O,0,-0.1118224102,1.6058077505,-4.6680465244  
 B,0,-1.463893088,1.5876117937,-5.3465889295  
 C,0,-1.9696099958,3.2247076709,-5.1973392338  
 C,0,-0.9241286395,3.9531336652,-5.8612571159  
 C,0,0.2708668677,4.262914889,-5.2615322771  
 O,0,5.8368669211,2.7122601837,-2.7155156794  
 O,0,-2.36225084,0.6941824015,-4.6790511227  
 C,0,-2.4258203586,-0.4745045586,-5.4858660251  
 C,0,-2.2056781185,0.0544001007,-6.90484794  
 O,0,-1.3357905129,1.1637134173,-6.724601818  
 H,0,-3.3924290882,-0.9675680901,-5.3529453539  
 H,0,-3.1527208424,0.3911517836,-7.3488837249  
 H,0,-1.6259128011,-1.1739781011,-5.2034286627  
 H,0,-2.0640810865,3.429932211,-4.1292735568  
 H,0,-2.9329667806,3.2406882565,-5.7091896867  
 H,0,-0.9893560486,4.0510282843,-6.9449365239  
 H,0,1.0634877627,4.7493062446,-5.8214077238  
 H,0,0.3387530034,4.3082480309,-4.1777995704  
 H,0,0.9051629895,2.1055487935,-6.3650858165  
 H,0,-1.7457960881,-0.6824464804,-7.5697649722  
 H,0,3.2504257649,2.7829784562,-6.3671312033  
 H,0,5.4335143895,2.9981736074,-5.1936380801  
 H,0,3.4964689001,2.1073918176,-1.4540084642  
 H,0,1.3386474459,1.8936040004,-2.625157547  
 C,0,5.9736124654,2.5314033587,-1.3124169171  
 H,0,7.0283722398,2.6865068254,-1.0933138394  
 H,0,5.372312785,3.2637023005,-0.7642482711  
 H,0,5.6820632891,1.5177223217,-1.0194667673

### B3LYP/6-31+G\*\*

anisaldehydeAllylBegTSB3PS  
 Saddle point  
 E(RB3LYP) = -831.458633015

Zero-point correction= 0.285544 (Hartree/Particle)  
 Thermal correction to Energy= 0.302023  
 Thermal correction to Enthalpy= 0.302968  
 Thermal correction to Gibbs Free Energy= 0.240939  
 Sum of electronic and ZPE= -831.173089  
 Sum of electronic and thermal Energies= -831.156610  
 Sum of electronic and thermal Enthalpies= -831.155665  
 Sum of electronic and thermal Free Energies= -831.217694

| E             | CV        | S         |
|---------------|-----------|-----------|
| KCal/Mol      | Cal/Mol-K | Cal/Mol-K |
| Total 189.523 | 64.025    | 130.551   |

C,0,3.4850035824,2.2540424043,-2.5078442771  
 C,0,2.2658095433,2.1364238558,-3.1755671489  
 C,0,2.176974161,2.3448830051,-4.5585276087  
 C,0,3.3479826493,2.6728074468,-5.2677344894  
 C,0,4.5662879766,2.794417867,-4.6163972861  
 C,0,4.6426386755,2.5877977164,-3.2280737508  
 C,0,0.9017763718,2.2049700242,-5.2796720854  
 O,0,-0.0867256157,1.6130665401,-4.6765744346  
 B,0,-1.4327949475,1.5340475732,-5.3480777358  
 C,0,-1.9955916935,3.2102445499,-5.1993021683  
 C,0,-0.9873633885,3.9520522517,-5.8856948286  
 C,0,0.2402110072,4.2659904985,-5.32855124  
 O,0,5.8801954188,2.7288070664,-2.677705497  
 O,0,-2.3308954326,0.6626926103,-4.6647272449  
 C,0,-2.5189679996,-0.4771474445,-5.5014186143  
 C,0,-2.2426205832,0.0471433508,-6.9217270076  
 O,0,-1.3205201109,1.1179481659,-6.7262314971  
 H,0,-3.5358236632,-0.864100807,-5.3741180969  
 H,0,-3.1616742415,0.4261877237,-7.3942923972  
 H,0,-1.8051578502,-1.2688325819,-5.2262791566  
 H,0,-2.0742117039,3.3865731189,-4.1252754393  
 H,0,-2.9700218503,3.1763057065,-5.687254113  
 H,0,-1.0870815815,4.0421957039,-6.9675785668  
 H,0,0.9955781798,4.7761118584,-5.91914802  
 H,0,0.3351808,4.3662426815,-4.2513951489  
 H,0,0.9562840169,2.1031254623,-6.3646041124  
 H,0,-1.800979307,-0.7093104151,-7.5803284129  
 H,0,3.2999302607,2.8299653736,-6.3425231409  
 H,0,5.4737165622,3.0425649851,-5.1567879857  
 H,0,3.523181848,2.0796439894,-1.4392995486  
 H,0,1.3711316019,1.8659533405,-2.6242348731  
 C,0,6.0353532393,2.5313603081,-1.2752343553  
 H,0,7.0934664472,2.6951091539,-1.0695232898  
 H,0,5.436650979,3.2508001863,-0.7035988236  
 H,0,5.7606916482,1.5102777303,-0.9843206047

### B3LYP/6-31+G\*\*/PCM

anisaldehydeAllylBegTSB3PSPCM  
 Saddle point  
 E(RB3LYP) = -831.470007628

Zero-point correction= 0.285274 (Hartree/Particle)  
 Thermal correction to Energy= 0.301771  
 Thermal correction to Enthalpy= 0.302715  
 Thermal correction to Gibbs Free Energy= 0.240473  
 Sum of electronic and ZPE= -831.184733  
 Sum of electronic and thermal Energies= -831.168237



Sum of electronic and thermal Enthalpies= -831.167292  
 Sum of electronic and thermal Free Energies= -831.229534

E CV S  
 KCal/Mol Cal/Mol-K Cal/Mol-K  
 Total 189.364 64.103 130.999

C,0,3.4854946543,2.2647750972,-2.5098648406  
 C,0,2.2658232212,2.1603716315,-3.1780314757  
 C,0,2.1793270278,2.3647102906,-4.5628065943  
 C,0,3.3532279571,2.6817899776,-5.2734372953  
 C,0,4.5727350565,2.7906977292,-4.6211543011  
 C,0,4.6475422518,2.5841025396,-3.2317651903  
 C,0,0.9063632716,2.2393608658,-5.2901453011  
 O,0,-0.0805486005,1.6084581983,-4.7094055493  
 B,0,-1.4286107451,1.538550768,-5.3715479903  
 C,0,-1.9963678847,3.1989802487,-5.240558008  
 C,0,-0.9712680598,3.9599118811,-5.8874505639  
 C,0,0.2376982222,4.2657995765,-5.2866120308  
 O,0,5.8843017939,2.7114045931,-2.6798007566  
 O,0,-2.3178562744,0.6606147475,-4.6621542552  
 C,0,-2.5078600482,-0.4947762293,-5.485746251  
 C,0,-2.2748492507,0.0234255333,-6.9117519722  
 O,0,-1.3370713321,1.0900361336,-6.7459563721  
 H,0,-3.5141972031,-0.897326434,-5.3320325483  
 H,0,-3.2064039699,0.4081882588,-7.3526605699  
 H,0,-1.7736512344,-1.2706314916,-5.2222052394  
 H,0,-2.1069489527,3.3788526553,-4.1691063913  
 H,0,-2.9568431375,3.1807475919,-5.7577859855  
 H,0,-1.0405879142,4.07875484,-6.9687722702  
 H,0,1.0055158198,4.7929532987,-5.8446330055  
 H,0,0.2974126679,4.343410021,-4.2049201349  
 H,0,0.9763086986,2.1608474453,-6.3754110524  
 H,0,-1.8606110361,-0.7377438541,-7.5814053515  
 H,0,3.3073326247,2.8406875385,-6.3477091982  
 H,0,5.4802259049,3.0298268205,-5.165817896  
 H,0,3.5210902089,2.0947526372,-1.4408515473  
 H,0,1.3705457147,1.9086229439,-2.6191073677  
 C,0,6.0352782375,2.5162785121,-1.2694549117  
 H,0,7.0944621474,2.668492118,-1.0637934346  
 H,0,5.4431913282,3.2454446102,-0.706044319  
 H,0,5.7474138339,1.4999899062,-0.9797230288

### B3LYP/6-31G\*

panisaldehydeTShp

E(RB+HF-LYP) = -831.403758153

Zero-point correction= 0.287244  
 (Hartree/Particle)  
 Thermal correction to Energy= 0.303645  
 Thermal correction to Enthalpy= 0.304589  
 Thermal correction to Gibbs Free Energy= 0.242741  
 Sum of electronic and zero-point Energies= -831.116515  
 Sum of electronic and thermal Energies= -831.100113  
 Sum of electronic and thermal Enthalpies= -831.099169  
 Sum of electronic and thermal Free Energies= -831.161017

|       | E (Thermal) | CV             | S              |
|-------|-------------|----------------|----------------|
|       | KCal/Mol    | Cal/Mol-Kelvin | Cal/Mol-Kelvin |
| Total | 190.540     | 63.578         | 130.170        |

C,0,3.4810573973,2.2535144579,-2.5090612249  
 C,0,2.2632981155,2.130290683,-3.1738699123  
 C,0,2.1718973063,2.3343609048,-4.5568866869  
 C,0,3.3395524969,2.6639430452,-5.268772175

C,0,4.5566154844,2.7899934107,-4.6195960116  
 C,0,4.6366414172,2.5873493697,-3.23125129  
 C,0,0.8943969605,2.1868966265,-5.270476996  
 O,0,-0.0917675697,1.6062440564,-4.6601296665  
 B,0,-1.4434875473,1.5397653931,-5.3385738719  
 C,0,-1.9888729025,3.2134976334,-5.1705796733  
 C,0,-0.9858390657,3.946951875,-5.8765123777  
 C,0,0.2465575203,4.2613118701,-5.3377740892  
 O,0,5.8740251874,2.7333832168,-2.6867931396  
 O,0,-2.3392594179,0.6638074962,-4.6667141144  
 C,0,-2.5205236857,-0.4654518059,-5.5106876002  
 C,0,-2.2112703679,0.0570334396,-6.9278565457  
 O,0,-1.3241460404,1.147791963,-6.719415516  
 H,0,-3.5433048923,-0.8475913851,-5.4076658567  
 H,0,-3.1265377236,0.404674381,-7.4329859423  
 H,0,-1.8229373945,-1.2701399319,-5.2280772157  
 H,0,-2.0494457168,3.4023645309,-4.0969529137  
 H,0,-2.9740171797,3.1966121914,-5.6390454064  
 H,0,-1.0973097566,4.0184949891,-6.9588594399  
 H,0,1.001371409,4.7606521529,-5.9392070889  
 H,0,0.3537712659,4.3734540882,-4.2626594645  
 H,0,0.9393650317,2.0806037094,-6.3555573105  
 H,0,-1.7378425202,-0.6991093434,-7.5667847961  
 H,0,3.2875608909,2.8187733083,-6.3441292406  
 H,0,5.463958834,3.0397833092,-5.1600417568  
 H,0,3.5226564298,2.0834048805,-1.4394128598  
 H,0,1.3685527363,1.8598293842,-2.6223278285  
 C,0,6.0272770768,2.5388393365,-1.287351226  
 H,0,7.0856443852,2.7029957641,-1.0787151836  
 H,0,5.4278098407,3.2574476054,-0.7139393597  
 H,0,5.7521709948,1.5185903938,-0.9909602189

### MP2/6-31G\*

anisaldehyde-mp2-freq-B3G

E(RHF) = -826.336719782

|                                              |             |
|----------------------------------------------|-------------|
| Zero-point correction=                       | 0.290432    |
| (Hartree/Particle)                           |             |
| Thermal correction to Energy=                | 0.306886    |
| Thermal correction to Enthalpy=              | 0.307831    |
| Thermal correction to Gibbs Free Energy=     | 0.245958    |
| Sum of electronic and zero-point Energies=   | -828.512042 |
| Sum of electronic and thermal Energies=      | -828.495588 |
| Sum of electronic and thermal Enthalpies=    | -828.494644 |
| Sum of electronic and thermal Free Energies= | -828.556517 |

|       | E (Thermal) | CV             | S                             |
|-------|-------------|----------------|-------------------------------|
|       | KCal/Mol    | Cal/Mol-Kelvin | Cal/Mol-Kelvin                |
| Total | 192.574     | 63.875         | 130.222                       |
| 1     | 6           | 0              | -2.961689 -0.697574 -0.744112 |
| 2     | 6           | 0              | -1.576657 -0.546658 -0.696338 |
| 3     | 6           | 0              | -0.971584 0.158581 0.349553   |
| 4     | 6           | 0              | -1.773690 0.715427 1.359062   |
| 5     | 6           | 0              | -3.152511 0.570542 1.318794   |
| 6     | 6           | 0              | -3.754978 -0.134370 0.265442  |
| 7     | 6           | 0              | 0.487523 0.305292 0.414961    |
| 8     | 8           | 0              | 1.214069 -0.441462 -0.344466  |
| 9     | 5           | 0              | 2.734457 -0.128833 -0.363539  |
| 10    | 6           | 0              | 2.748544 1.285390 -1.317123   |
| 11    | 6           | 0              | 1.986280 2.215745 -0.530910   |
| 12    | 6           | 0              | 0.612258 2.257867 -0.553562   |
| 13    | 8           | 0              | -5.117496 -0.214179 0.325708  |
| 14    | 8           | 0              | 3.461451 -1.201578 -0.957555  |
| 15    | 6           | 0              | 3.973215 -1.946702 0.149130   |

|    |   |   |           |           |           |
|----|---|---|-----------|-----------|-----------|
| 16 | 6 | 0 | 4.221644  | -0.886138 | 1.220876  |
| 17 | 8 | 0 | 3.205730  | 0.093324  | 0.986385  |
| 18 | 1 | 0 | 4.878554  | -2.480352 | -0.157330 |
| 19 | 1 | 0 | 5.213006  | -0.428507 | 1.099435  |
| 20 | 1 | 0 | 3.229281  | -2.680092 | 0.492866  |
| 21 | 1 | 0 | 2.321629  | 1.042557  | -2.291884 |
| 22 | 1 | 0 | 3.812799  | 1.516057  | -1.392274 |
| 23 | 1 | 0 | 2.500384  | 2.707699  | 0.295594  |
| 24 | 1 | 0 | 0.059878  | 2.915501  | 0.111630  |
| 25 | 1 | 0 | 0.070678  | 1.892801  | -1.421386 |
| 26 | 1 | 0 | 0.927531  | 0.646289  | 1.356477  |
| 27 | 1 | 0 | 4.138258  | -1.274744 | 2.241878  |
| 28 | 1 | 0 | -1.311495 | 1.260058  | 2.181311  |
| 29 | 1 | 0 | -3.791538 | 0.988522  | 2.091727  |
| 30 | 1 | 0 | -3.403908 | -1.254565 | -1.563146 |
| 31 | 1 | 0 | -0.950217 | -0.989254 | -1.466828 |
| 32 | 6 | 0 | -5.772127 | -0.929218 | -0.721388 |
| 33 | 1 | 0 | -6.834236 | -0.873765 | -0.486737 |
| 34 | 1 | 0 | -5.585741 | -0.465117 | -1.695540 |
| 35 | 1 | 0 | -5.454546 | -1.976877 | -0.744978 |

**Transition structures for reaction of 4 and 5 – Si facial attack  
– 7 in manuscript**

**M062X/6-31+G\*\***

This structure was optimized with the Gaussian option  
int(grid=ultrafine).  
FullRoughAnisaldehydeTSM06  
ts for allylboration with Roush allylboronate and anisaldehyde  
E(RM062X) = -1443.90674453

Zero-point correction= 0.488891 (Hartree/Particle)  
Thermal correction to Energy= 0.519111  
Thermal correction to Enthalpy= 0.520055  
Thermal correction to Gibbs Free Energy= 0.424660  
Sum of electronic and ZPE= -1443.417853  
Sum of electronic and thermal Energies= -1443.387634  
Sum of electronic and thermal Enthalpies= -1443.386690  
Sum of electronic and thermal Free Energies= -1443.482085

| E        | CV        | S         |
|----------|-----------|-----------|
| KCal/Mol | Cal/Mol-K | Cal/Mol-K |
| Total    | 325.747   | 113.534   |
|          | 200.776   |           |

C,0,5.1342206722,0.0083298591,-1.1156892069  
C,0,3.8071814189,-0.3656755959,-0.920715637  
C,0,3.2355131851,-0.3306513268,0.3506660316  
C,0,4.0115626697,0.0908053478,1.4390465027  
C,0,5.3315704267,0.4638775357,1.2605859742  
C,0,5.9005014785,0.4223310036,-0.020307393  
C,0,1.8307562383,-0.7133943658,0.5621217461  
O,0,1.0697453143,-0.8215200326,-0.4713104124  
B,0,-0.3112917094,-1.3601454101,-0.2609047243  
O,0,-0.9493531284,-0.8164334506,0.9284506889  
C,0,-1.8552182043,0.1487559766,0.4909979082  
C,0,-1.1965322557,1.5268135966,0.4208016803  
O,0,-0.0594408785,1.7641703303,0.7477906098  
O,0,7.1978728622,0.8058404733,-0.0989283626  
O,0,-1.1368981215,-1.0247399996,-1.387318367  
C,0,-2.2693736744,-0.362203307,-0.919477104  
C,0,-3.4430902234,-1.3230827447,-0.7549225872  
O,0,-3.3553926223,-2.5242252992,-0.6981306241  
C,0,-0.0273049145,-3.041280799,-0.0496828819  
C,0,0.7825870873,-3.0365504324,1.1322603196

C,0,2.1340421725,-2.7810371424,1.1166734344  
O,0,-4.5921119928,-0.6377369172,-0.6306118996  
C,0,-5.784186371,-1.4029528142,-0.3401325356  
C,0,-5.805715775,-1.7531130384,1.1394537068  
C,0,-6.9525007982,-0.5329206277,-0.7629377543  
O,0,-2.0615477157,2.4412066044,-0.0393709448  
C,0,-1.5861778213,3.8039506338,-0.151043478  
C,0,-1.6254522837,4.4661245919,1.2167779495  
C,0,-2.4916655532,4.4774615473,-1.1645235336  
H,0,-2.7132382539,0.2257190409,1.1701992556  
H,0,-2.5669340183,0.4537531869,-1.5846658914  
H,0,0.469640267,-3.3909879426,-0.9556414257  
H,0,-1.0375442945,-3.4366620135,0.0587081971  
H,0,0.2642299759,-2.9796693946,2.0895919676  
H,0,2.6973865793,-2.7130067286,2.0424457268  
H,0,2.7092546885,-2.9704118434,0.2145181432  
H,0,1.3594049729,-0.425390169,1.5032957676  
H,0,-0.5554255235,3.7609564645,-0.5161323024  
H,0,-5.7417866095,-2.3172737365,-0.939954999  
H,0,3.5684075986,0.1296759722,2.4311148797  
H,0,5.9468939386,0.7977333734,2.0888356491  
H,0,5.5544400355,-0.0211255158,-2.1134979604  
H,0,3.1980769505,-0.6787136459,-1.7631555017  
H,0,-1.2835074819,5.5021840462,1.1384219977  
H,0,-2.6495154168,4.4669993751,1.602976727  
H,0,-0.9753574944,3.9402742294,1.9190938622  
H,0,-2.1765925557,5.5137626383,-1.3140103273  
H,0,-2.4525312528,3.9581938372,-2.1249910641  
H,0,-3.526205335,4.4757384793,-0.8086269064  
H,0,-7.8934445756,-1.0610468427,-0.5859970785  
H,0,-6.9611143849,0.3967147469,-0.1860458662  
H,0,-6.8853508614,-0.283501434,-1.824456486  
H,0,-6.7067213729,-2.3264153784,1.3759298739  
H,0,-4.9340922425,-2.3551888651,1.4059235579  
H,0,-5.8098484206,-0.8377825695,1.7400178591  
C,0,7.8205000921,0.7874013401,-1.3688404264  
H,0,8.8428572061,1.1254081395,-1.2061124704  
H,0,7.831850323,-0.2252965811,-1.7878407222  
H,0,7.3164319837,1.467364594,-2.065052142

**m062x/6-31+G\*\*/PCM**

FullRoughAnisaldehydeTSM06PCM  
ts for allylboration with Roush allylboronate and anisaldehyde  
E(RM062X) = -1443.92412239

Zero-point correction= 0.488496 (Hartree/Particle)  
Thermal correction to Energy= 0.518651  
Thermal correction to Enthalpy= 0.519595  
Thermal correction to Gibbs Free Energy= 0.424505  
Sum of electronic and ZPE= -1443.435626  
Sum of electronic and thermal Energies= -1443.405472  
Sum of electronic and thermal Enthalpies= -1443.404527  
Sum of electronic and thermal Free Energies= -1443.499618

| E        | CV        | S         |
|----------|-----------|-----------|
| KCal/Mol | Cal/Mol-K | Cal/Mol-K |
| Total    | 325.458   | 113.514   |
|          | 200.135   |           |

C,0,5.1123765586,0.1962155444,-1.116322246  
C,0,3.8076622661,-0.2464412188,-0.9186687978  
C,0,3.2408873914,-0.2530419111,0.3566433689  
C,0,4.0012151546,0.1932860211,1.4473207181  
C,0,5.3001645538,0.6339387237,1.2659564741  
C,0,5.8643224845,0.6345893448,-0.0187207733  
C,0,1.8618596645,-0.7130506306,0.5800739949

O,0,1.0786588859,-0.8224922682,-0.4446873827  
 B,0,-0.2726924324,-1.4244331527,-0.2236291865  
 O,0,-0.947815949,-0.8853317326,0.9479981981  
 C,0,-1.8725397699,0.0545526197,0.4882139587  
 C,0,-1.2593468137,1.4541088104,0.4197958649  
 O,0,-0.1391500028,1.730701226,0.7816299333  
 O,0,7.1407976007,1.0765327804,-0.1016784748  
 O,0,-1.1090508879,-1.1384407856,-1.3658683985  
 C,0,-2.2545661572,-0.4740469051,-0.9237274054  
 C,0,-3.4322603743,-1.4336063664,-0.7830627299  
 O,0,-3.3442988894,-2.6394827686,-0.7713228352  
 C,0,0.071026492,-3.0836529605,0.0085177847  
 C,0,0.9350891237,-3.0491936815,1.1549358897  
 C,0,2.2740869728,-2.7462013952,1.0719675797  
 O,0,-4.5706940403,-0.7502507839,-0.6325183136  
 C,0,-5.7778696537,-1.5070883983,-0.3508384725  
 C,0,-5.804900381,-1.8597025718,1.1269387205  
 C,0,-6.9343935938,-0.6242879911,-0.7753806854  
 O,0,-2.1387673054,-3.5256623961,0.0756233212  
 C,0,-1.7288265986,3.7174488422,-0.1772635253  
 C,0,-1.8833200224,4.3818479274,1.1801439899  
 C,0,-2.6084144134,4.3328055883,-1.2473970383  
 H,0,-2.7412377521,0.1121813378,1.1551848215  
 H,0,-2.5398113172,0.3352404301,-1.6025473353  
 H,0,0.5419262071,-3.4384475126,-0.9101448904  
 H,0,-0.911911155,-3.5256623961,0.173940029  
 H,0,0.4660975012,-3.0186305922,2.1386816503  
 H,0,2.8778760088,-2.6624886059,1.9701915253  
 H,0,2.8070328085,-2.9119146619,0.1393143963  
 H,0,1.3997881627,-0.4609414316,1.5358261966  
 H,0,-0.6798187078,3.7245225685,-0.4868188898  
 H,0,-5.7409459516,-2.4159972609,-0.9577623611  
 H,0,3.5663386842,0.193393815,2.4438151902  
 H,0,5.8993306203,0.984422567,2.0994819783  
 H,0,5.5276184462,0.1961802065,-2.1164226409  
 H,0,3.2194234376,-0.5871475114,-1.7651224721  
 H,0,-1.5800352086,5.4302571612,1.1138615607  
 H,0,-2.9290138649,4.3420488509,1.5004347439  
 H,0,-1.2598453406,3.8882649686,1.9290673917  
 H,0,-2.3402562511,5.383798283,-1.3830076954  
 H,0,-2.4803604439,3.8145301571,-2.2007638836  
 H,0,-3.6608759884,4.2775488619,-0.9533720769  
 H,0,-7.878355058,-1.1480130933,-0.603477018  
 H,0,-6.9403983324,0.3022249141,-0.1932617819  
 H,0,-6.8630960576,-0.3736512655,-1.8364807544  
 H,0,-6.7085983607,-2.4314878609,1.3550070945  
 H,0,-4.936215256,-2.4638317774,1.3999480899  
 H,0,-5.8104507197,-0.9461625054,1.7298361847  
 C,0,7.7653408083,1.0804504634,-1.3782481293  
 H,0,8.7766416347,1.4483376617,-1.2139008126  
 H,0,7.8049228432,0.0692566533,-1.7962586953  
 H,0,7.2390687395,1.7471327889,-2.0690833052

**B3LYP/6-31G\***

panisaldehydeDIPESiTSB3G  
 E(RB+HF-LYP) = -1444.42905672

Zero-point correction= 0.486011  
 (Hartree/Particle)  
 Thermal correction to Energy= 0.516646  
 Thermal correction to Enthalpy= 0.517591  
 Thermal correction to Gibbs Free Energy= 0.420647  
 Sum of electronic and zero-point Energies= -1443.943046  
 Sum of electronic and thermal Energies= -1443.912410  
 Sum of electronic and thermal Enthalpies= -1443.911466

Sum of electronic and thermal Free Energies= -1444.008410

|       | E (Thermal)<br>KCal/Mol | CV<br>Cal/Mol-Kelvin | S<br>Cal/Mol-Kelvin |
|-------|-------------------------|----------------------|---------------------|
| Total | 324.200                 | 114.500              | 204.035             |

C,0,3.6104299693,-0.6182378815,-1.0480325201  
 C,0,3.1449656298,-0.474906165,0.2569731173  
 C,0,3.9941432444,-0.0416248322,1.2829561772  
 C,0,5.3337754275,0.2515995405,0.971359721  
 C,0,5.8098157524,0.1119022781,-0.3220366105  
 C,0,4.9503867385,-0.326601648,-1.3434944017  
 C,0,3.5072983566,0.1297567668,2.6609041859  
 O,0,2.2212485538,0.1457526988,2.8565421086  
 B,0,1.7015110116,0.1928864343,4.2580736116  
 O,0,2.4038060427,1.1278319825,5.1185562544  
 C,0,1.5539237814,2.2164084189,5.3427108377  
 C,0,1.8495197645,3.3698731193,4.3739684575  
 O,0,2.6730980901,3.3439673497,3.4870850842  
 O,0,5.5108270315,-0.4309737465,-2.5788417597  
 O,0,0.3111693211,0.5451757791,4.2553826267  
 C,0,0.1175975058,1.6207041705,5.1292218886  
 C,0,-0.4581059055,1.155019203,6.4717554325  
 O,0,-0.4045227312,0.0260807558,6.9062359041  
 C,0,1.9942975326,-1.4433111878,4.8125402923  
 C,0,3.4179892332,-1.5254730828,4.7194145217  
 C,0,4.0872793469,-1.7460992331,3.528053201  
 O,0,-1.0096257418,2.2038155778,7.1228510343  
 C,0,-1.5603123309,1.9536826688,8.4501031766  
 C,0,-0.4402795611,2.0105334988,9.4840403688  
 C,0,-2.6392362073,3.0066559442,8.6607117576  
 O,0,1.0615283818,4.4283810349,4.6629453474  
 C,0,1.2040829491,5.6189002843,3.8308143991  
 C,0,2.3531536958,6.4707205079,4.3604557275  
 C,0,-0.1453852609,6.3219175863,3.8698549359  
 H,0,1.6816220649,2.6065896813,6.36038894  
 H,0,-0.5655012307,2.3604350744,4.6993734037  
 H,0,1.4374513957,-2.0934938984,4.1347423629  
 H,0,1.5715595031,-1.4343581808,5.8172961928  
 H,0,3.9915856912,-1.1263208809,5.5563625719  
 H,0,5.1735202598,-1.7330097381,3.4972972247  
 H,0,3.6051885352,-2.3180877563,2.7404195989  
 H,0,4.1134541514,0.7391808617,3.3310690532  
 H,0,1.4348975481,5.2796692826,2.8168505254  
 H,0,-1.996432833,0.9505373923,8.4357521177  
 H,0,6.0033348076,0.5995822992,1.7544815639  
 H,0,6.8401903282,0.3408189807,-0.5744066256  
 H,0,2.9280032546,-0.9482717824,-1.8227197568  
 H,0,2.1059598342,-0.6859405571,0.4887602812  
 H,0,2.4609871471,7.3770314702,3.7536978006  
 H,0,2.1652318028,6.7708199752,5.3975549296  
 H,0,3.2942787847,5.9157633418,4.3160234105  
 H,0,-0.1188259923,7.2211723621,3.2446874498  
 H,0,-0.9373000524,5.6650985913,3.496388462  
 H,0,-0.3988050225,6.6204046208,4.8930678024  
 H,0,-3.1221726589,2.8610784908,9.6332329771  
 H,0,-2.2095312839,4.0142413357,8.6365171051  
 H,0,-3.4047220371,2.9397880885,7.8812844755  
 H,0,-0.8454695879,1.8453932519,10.4888808905  
 H,0,0.3053876512,1.2357197655,9.2853708511  
 H,0,0.0502105526,2.9904728426,9.4673617425  
 C,0,4.694581215,-0.8593934111,-3.65988664  
 H,0,5.3429410479,-0.8664644706,-4.5375962344  
 H,0,4.3008447907,-1.8699496473,-3.4909070611  
 H,0,3.8588157112,-0.1688102089,-3.8307862925

**B3LYP/6-31+G\*\***

panisaldehydeDIPESiTSB3+G

E(RB+HF-LYP) = -1444.51875273

Zero-point correction= 0.482734  
 (Hartree/Particle)  
 Thermal correction to Energy= 0.513610  
 Thermal correction to Enthalpy= 0.514554  
 Thermal correction to Gibbs Free Energy= 0.416856  
 Sum of electronic and zero-point Energies= -1444.036018  
 Sum of electronic and thermal Energies= -1444.005143  
 Sum of electronic and thermal Enthalpies= -1444.004199  
 Sum of electronic and thermal Free Energies= -1444.101897

|       | E (Thermal) | CV             | S              |
|-------|-------------|----------------|----------------|
|       | KCal/Mol    | Cal/Mol-Kelvin | Cal/Mol-Kelvin |
| Total | 322.295     | 115.282        | 205.623        |

C,0,5.2734693471,-0.1721161319,-1.2914502822  
 C,0,3.9567328071,-0.5163474012,-0.9848059867  
 C,0,3.4726710335,-0.4229925851,0.3264327525  
 C,0,4.3420118832,0.0301493991,1.3360114164  
 C,0,5.6542493615,0.3732629803,1.0459047787  
 C,0,6.1302832213,0.2720845283,-0.272548045  
 C,0,2.0801046687,-0.765068856,0.6616646514  
 O,0,1.2247339824,-0.8678427849,-0.3172689083  
 B,0,-0.1660473222,-1.3245807589,-0.033732877  
 O,0,-0.7758079114,-0.6956742293,1.1253975426  
 C,0,-1.7715659783,0.1805983369,0.6754143769  
 C,0,-1.2687836182,1.6310580256,0.6154579945  
 O,0,-0.140093872,1.9912190747,0.8704009278  
 O,0,7.4309604499,0.6323320123,-0.4601342919  
 O,0,-1.0125798272,-1.0705893396,-1.1663017019  
 C,0,-2.1547286192,-0.3774241289,-0.7434438248  
 C,0,-3.3698273059,-1.3077245448,-0.6344007616  
 O,0,-3.3215470038,-2.5071527226,-0.4628298481  
 C,0,0.0619041578,-3.0403659382,0.2693900979  
 C,0,0.9316682329,-3.0223986506,1.4010491582  
 C,0,2.2959047845,-2.791190565,1.3050705404  
 O,0,-4.5119050843,-0.592202984,-0.7286610888  
 C,0,-5.7807577741,-1.304853705,-0.5830722177  
 C,0,-6.1370732815,-1.4050498605,0.8965898246  
 C,0,-6.7980753066,-0.5242423887,-1.4032696509  
 O,0,-2.2760261677,2.4549872932,0.2558287261  
 C,0,-1.9901620249,3.8865788124,0.1550499741  
 C,0,-2.1794809911,4.5328097382,1.5235347565  
 C,0,-2.9295530277,4.4311341074,-0.9116096575  
 H,0,-2.6290993791,0.1701114932,1.3595396324  
 H,0,-2.403086641,0.4274476277,-1.4413602974  
 H,0,0.4887637199,-3.4380036185,-0.652930576  
 H,0,-0.9574683017,-3.3844918425,0.4420149921  
 H,0,0.4685896948,-2.9172909724,2.3823392732  
 H,0,2.9022528535,-2.7227876359,2.2037180863  
 H,0,2.8256248779,-3.0781460807,0.4015190162  
 H,0,1.6972778834,-0.3966194186,1.6136148307  
 H,0,-0.9476390035,3.9858318584,-0.1601279226  
 H,0,-5.6366887235,-2.3066185317,-0.9976874882  
 H,0,3.9791966496,0.1215772004,2.3567162031  
 H,0,6.3289243351,0.7293282113,1.8173257493  
 H,0,5.6159235576,-0.2469801458,-2.316494322  
 H,0,3.2869448158,-0.846733951,-1.7720318565  
 H,0,-1.9775719133,5.6075547469,1.4596252296  
 H,0,-3.2076879998,4.3957578642,1.8754106213  
 H,0,-1.4925005781,4.1010485202,2.2560652939

H,0,-2.7522430092,5.5025859825,-1.0515304544  
 H,0,-2.76714563,3.927398293,-1.8689025222  
 H,0,-3.9752046882,4.2896637126,-0.6188902454  
 H,0,-7.7733817996,-1.0198308456,-1.3565654467  
 H,0,-6.9098820248,0.4946125737,-1.0176458266  
 H,0,-6.4908349069,-0.4657809481,-2.4514989754  
 H,0,-7.0901372622,-1.931562317,1.0161798462  
 H,0,-5.3719699504,-1.9614467296,1.4444299015  
 H,0,-6.2374626861,-0.4072847984,1.3373894203  
 C,0,7.9796016936,0.5656318953,-1.772823853  
 H,0,9.0138667069,0.897588019,-1.6778888507  
 H,0,7.9599437176,-0.459886692,-2.161388722  
 H,0,7.4448791777,1.2303407961,-2.4621181134

**B3LYP/6-31+G\*\*/PCM**

FullRoushAnisaldehydeTSAB3PSPCM

ts for allylboration with Roush allylboronate and anisaldehyde with G09 PCM

E(RB3LYP) = -1444.53692178

Zero-point correction= 0.482191 (Hartree/Particle)  
 Thermal correction to Energy= 0.513097  
 Thermal correction to Enthalpy= 0.514041  
 Thermal correction to Gibbs Free Energy= 0.416127  
 Sum of electronic and ZPE= -1444.054731  
 Sum of electronic and thermal Energies= -1444.023825  
 Sum of electronic and thermal Enthalpies= -1444.022881  
 Sum of electronic and thermal Free Energies= -1444.120795

|       | E        | CV        | S         |
|-------|----------|-----------|-----------|
|       | KCal/Mol | Cal/Mol-K | Cal/Mol-K |
| Total | 321.973  | 115.443   | 206.077   |

6 5.316161 -0.020893 -1.252270  
 6 4.012491 -0.413954 -0.951576  
 6 3.522270 -0.350990 0.360627  
 6 4.374684 0.116499 1.379423  
 6 5.674591 0.508282 1.094862  
 6 6.156062 0.440774 -0.225125  
 6 2.144024 -0.743101 0.695719  
 8 1.271260 -0.817773 -0.278654  
 5 -0.108070 -1.317932 -0.014521  
 8 -0.774489 -0.684096 1.113531  
 6 -1.807517 0.133602 0.629140  
 6 -1.403639 1.615705 0.584629  
 8 -0.306288 2.049960 0.876011  
 8 7.441681 0.845986 -0.407789  
 8 -0.932648 -1.095086 -1.180186  
 6 -2.112273 -0.436565 -0.801823  
 6 -3.315876 -1.390353 -0.771275  
 8 -3.252136 -2.602607 -0.843941  
 6 0.146547 -3.014894 0.304043  
 6 1.059374 -3.005198 1.407093  
 6 2.415586 -2.763211 1.258301  
 8 -4.453084 -0.686556 -0.651780  
 6 -5.728847 -1.413241 -0.574360  
 6 -6.008157 -1.778582 0.878593  
 6 -6.774191 -0.492363 -1.185124  
 8 -2.447069 2.363639 0.192111  
 6 -2.270480 3.819674 0.082158  
 6 -2.574956 4.459428 1.431374  
 6 -3.198571 4.273601 -1.034221  
 1 -2.684535 0.066939 1.282931  
 1 -2.350119 0.365207 -1.508205  
 1 0.547051 -3.422092 -0.626655

1 -0.853744 -3.389394 0.521910  
 1 0.638096 -2.926194 2.409313  
 1 3.056146 -2.702800 2.132884  
 1 2.907421 -3.025534 0.326148  
 1 1.772915 -0.416650 1.666943  
 1 -1.226786 3.994408 -0.190572  
 1 -5.615902 -2.318803 -1.175614  
 1 4.010644 0.177286 2.401700  
 1 6.333125 0.874691 1.875502  
 1 5.663616 -0.074090 -2.276618  
 1 3.362833 -0.764718 -1.746620  
 1 -2.450572 5.544929 1.360324  
 1 -3.606495 4.250096 1.733652  
 1 -1.896808 4.089016 2.204830  
 1 -3.091311 5.352493 -1.184160  
 1 -2.954728 3.770173 -1.974180  
 1 -4.243572 4.063078 -0.784018  
 1 -7.748908 -0.990177 -1.180388  
 1 -6.859135 0.436648 -0.611745  
 1 -6.519733 -0.243980 -2.219550  
 1 -6.955730 -2.323073 0.944998  
 1 -5.219462 -2.418688 1.283162  
 1 -6.085511 -0.877114 1.495522  
 6 7.999061 0.805730 -1.725944  
 1 9.020739 1.170574 -1.623861  
 1 8.011926 -0.217491 -2.116593  
 1 7.442992 1.457477 -2.408323

**MPW1K/6-31+G\*\***

panisaldehydeDIPESiMPW1K+G

E(RmPW+HF-PW91) = -1444.07187176

Zero-point correction= 0.498992  
 (Hartree/Particle)  
 Thermal correction to Energy= 0.528955  
 Thermal correction to Enthalpy= 0.529899  
 Thermal correction to Gibbs Free Energy= 0.434290  
 Sum of electronic and zero-point Energies= -1443.572880  
 Sum of electronic and thermal Energies= -1443.542917  
 Sum of electronic and thermal Enthalpies= -1443.541973  
 Sum of electronic and thermal Free Energies= -1443.637581

|       | E (Thermal) | CV                  | S              |
|-------|-------------|---------------------|----------------|
| Total | KCal/Mol    | Cal/Mol-Kelvin      | Cal/Mol-Kelvin |
|       | 331.924     | 111.533             | 201.226        |
| 1     | 6 0         | 5.155434 -0.110604  | -1.188461      |
| 2     | 6 0         | 3.836933 -0.465044  | -0.958440      |
| 3     | 6 0         | 3.306544 -0.444955  | 0.324553       |
| 4     | 6 0         | 4.122911 -0.053314  | 1.385881       |
| 5     | 6 0         | 5.435719 0.299835   | 1.171929       |
| 6     | 6 0         | 5.961980 0.270602   | -0.119481      |
| 7     | 6 0         | 1.908463 -0.797401  | 0.573474       |
| 8     | 8 0         | 1.113473 -0.868700  | -0.427754      |
| 9     | 5 0         | -0.272544 -1.370347 | -0.185854      |
| 10    | 8 0         | -0.872077 -0.796093 | 0.996522       |
| 11    | 6 0         | -1.780105 0.158929  | 0.579720       |
| 12    | 6 0         | -1.161388 1.547406  | 0.558726       |
| 13    | 8 0         | -0.050686 1.807762  | 0.929808       |
| 14    | 8 0         | 7.251221 0.630945   | -0.235340      |
| 15    | 8 0         | -1.102695 -1.023882 | -1.293757      |
| 16    | 6 0         | -2.199651 -0.325580 | -0.829200      |
| 17    | 6 0         | -3.422532 -1.219135 | -0.718974      |
| 18    | 8 0         | -3.408792 -2.417803 | -0.732516      |
| 19    | 6 0         | -0.033515 -3.041177 | 0.025165       |

|    |   |   |           |           |           |
|----|---|---|-----------|-----------|-----------|
| 20 | 6 | 0 | 0.819659  | -3.070423 | 1.168858  |
| 21 | 6 | 0 | 2.170580  | -2.857319 | 1.105127  |
| 22 | 8 | 0 | -4.521894 | -0.480217 | -0.582506 |
| 23 | 6 | 0 | -5.770498 | -1.169177 | -0.415022 |
| 24 | 6 | 0 | -5.950120 | -1.545925 | 1.037843  |
| 25 | 6 | 0 | -6.838872 | -0.233015 | -0.923618 |
| 26 | 8 | 0 | -2.031863 | 2.441884  | 0.103300  |
| 27 | 6 | 0 | -1.611694 | 3.815135  | 0.047626  |
| 28 | 6 | 0 | -1.819042 | 4.459555  | 1.398990  |
| 29 | 6 | 0 | -2.421071 | 4.458857  | -1.050756 |
| 30 | 1 | 0 | -2.631863 | 0.209996  | 1.260042  |
| 31 | 1 | 0 | -2.449288 | 0.507109  | -1.484274 |
| 32 | 1 | 0 | 0.412563  | -3.411541 | -0.892557 |
| 33 | 1 | 0 | -1.037953 | -3.421760 | 0.176289  |
| 34 | 1 | 0 | 0.344414  | -3.013105 | 2.141399  |
| 35 | 1 | 0 | 2.763161  | -2.822731 | 2.007593  |
| 36 | 1 | 0 | 2.705810  | -3.067046 | 0.190529  |
| 37 | 1 | 0 | 1.483287  | -0.504815 | 1.527219  |
| 38 | 1 | 0 | -0.552825 | 3.820354  | -0.202557 |
| 39 | 1 | 0 | -5.728506 | -2.069976 | -1.024033 |
| 40 | 1 | 0 | 3.718146  | -0.019049 | 2.387816  |
| 41 | 1 | 0 | 6.075539  | 0.609244  | 1.983535  |
| 42 | 1 | 0 | 5.539287  | -0.128708 | -2.195294 |
| 43 | 1 | 0 | 3.201421  | -0.749257 | -1.783584 |
| 44 | 1 | 0 | -1.513420 | 5.503591  | 1.363857  |
| 45 | 1 | 0 | -2.869248 | 4.419394  | 1.683145  |
| 46 | 1 | 0 | -1.226117 | 3.958913  | 2.159593  |
| 47 | 1 | 0 | -2.134313 | 5.502752  | -1.159999 |
| 48 | 1 | 0 | -2.254330 | 3.956309  | -2.000329 |
| 49 | 1 | 0 | -3.484031 | 4.417078  | -0.820844 |
| 50 | 1 | 0 | -7.815407 | -0.706976 | -0.848159 |
| 51 | 1 | 0 | -6.856577 | 0.684617  | -0.338544 |
| 52 | 1 | 0 | -6.662254 | 0.026143  | -1.964612 |
| 53 | 1 | 0 | -6.897920 | -2.063504 | 1.173873  |
| 54 | 1 | 0 | -5.153609 | -2.208502 | 1.365528  |
| 55 | 1 | 0 | -5.954004 | -0.655730 | 1.664898  |
| 56 | 6 | 0 | 7.839284  | 0.627440  | -1.508913 |
| 57 | 1 | 0 | 8.865807  | 0.944587  | -1.366127 |
| 58 | 1 | 0 | 7.829550  | -0.370410 | -1.947875 |
| 59 | 1 | 0 | 7.337781  | 1.325465  | -2.179475 |

**MPW1K/6-31+G\*\* PCM solvent model for dichloromethane**

panisaldehydeDIPESiTSPCMmpw1k+G

E(RmPW+HF-PW91) = -1444.09535888

Zero-point correction= 0.497144  
 (Hartree/Particle)  
 Thermal correction to Energy= 0.527180  
 Thermal correction to Enthalpy= 0.528124  
 Thermal correction to Gibbs Free Energy= 0.432279  
 Sum of electronic and zero-point Energies= -1443.598215  
 Sum of electronic and thermal Energies= -1443.568179  
 Sum of electronic and thermal Enthalpies= -1443.567235  
 Sum of electronic and thermal Free Energies= -1443.663080

|       | E (Thermal) | CV                 | S              |
|-------|-------------|--------------------|----------------|
| Total | KCal/Mol    | Cal/Mol-Kelvin     | Cal/Mol-Kelvin |
|       | 330.810     | 111.741            | 201.724        |
| 1     | 6 0         | 5.189787 -0.065726 | -1.183072      |
| 2     | 6 0         | 3.881706 -0.452806 | -0.946096      |
| 3     | 6 0         | 3.353646 -0.435060 | 0.339658       |
| 4     | 6 0         | 4.164090 -0.022093 | 1.398898       |
| 5     | 6 0         | 5.467070 0.364405  | 1.177551       |
| 6     | 6 0         | 5.988651 0.343855  | -0.116950      |

|    |   |   |           |           |           |
|----|---|---|-----------|-----------|-----------|
| 7  | 6 | 0 | 1.967139  | -0.816224 | 0.605818  |
| 8  | 8 | 0 | 1.141118  | -0.849855 | -0.379836 |
| 9  | 5 | 0 | -0.233190 | -1.379790 | -0.141684 |
| 10 | 8 | 0 | -0.872054 | -0.796451 | 1.017455  |
| 11 | 6 | 0 | -1.796148 | 0.134918  | 0.573813  |
| 12 | 6 | 0 | -1.230518 | 1.546698  | 0.578940  |
| 13 | 8 | 0 | -0.155817 | 1.849308  | 1.027088  |
| 14 | 8 | 0 | 7.266892  | 0.738275  | -0.240165 |
| 15 | 8 | 0 | -1.052847 | -1.053731 | -1.275593 |
| 16 | 6 | 0 | -2.167265 | -0.353848 | -0.845105 |
| 17 | 6 | 0 | -3.401051 | -1.239379 | -0.802373 |
| 18 | 8 | 0 | -3.406608 | -2.426068 | -1.000954 |
| 19 | 6 | 0 | 0.019562  | -3.036893 | 0.080612  |
| 20 | 6 | 0 | 0.932023  | -3.080950 | 1.183588  |
| 21 | 6 | 0 | 2.276823  | -2.873234 | 1.044713  |
| 22 | 8 | 0 | -4.472009 | -0.516250 | -0.520670 |
| 23 | 6 | 0 | -5.745340 | -1.183253 | -0.415036 |
| 24 | 6 | 0 | -5.909472 | -1.722344 | 0.986826  |
| 25 | 6 | 0 | -6.787819 | -0.158252 | -0.852808 |
| 26 | 8 | 0 | -2.101058 | 2.396989  | 0.063541  |
| 27 | 6 | 0 | -1.768458 | 3.800193  | 0.048851  |
| 28 | 6 | 0 | -2.111272 | 4.408608  | 1.388680  |
| 29 | 6 | 0 | -2.547988 | 4.402080  | -1.093395 |
| 30 | 1 | 0 | -2.665445 | 0.159010  | 1.233138  |
| 31 | 1 | 0 | -2.391959 | 0.478441  | -1.512349 |
| 32 | 1 | 0 | -0.424813 | -3.419040 | -0.852850 |
| 33 | 1 | 0 | -0.967047 | -3.439154 | 0.287920  |
| 34 | 1 | 0 | 0.513597  | -3.045499 | 2.185918  |
| 35 | 1 | 0 | 2.919274  | -2.852348 | 1.913563  |
| 36 | 1 | 0 | 2.755967  | -3.061075 | 0.093820  |
| 37 | 1 | 0 | 1.572418  | -0.562047 | 1.585377  |
| 38 | 1 | 0 | -0.697790 | 3.879942  | -0.135437 |
| 39 | 1 | 0 | -5.745134 | -2.002843 | -1.132555 |
| 40 | 1 | 0 | 3.764002  | 0.001480  | 2.406013  |
| 41 | 1 | 0 | 6.100350  | 0.692013  | 1.991216  |
| 42 | 1 | 0 | 5.568056  | -0.085250 | -2.193551 |
| 43 | 1 | 0 | 3.260078  | -0.765408 | -1.774755 |
| 44 | 1 | 0 | -1.864388 | 5.468625  | 1.385370  |
| 45 | 1 | 0 | -3.175685 | 4.305431  | 1.593159  |
| 46 | 1 | 0 | -1.549848 | 3.933144  | 2.188829  |
| 47 | 1 | 0 | -2.321420 | 5.463216  | -1.173775 |
| 48 | 1 | 0 | -2.288640 | 3.923948  | -2.034961 |
| 49 | 1 | 0 | -3.618360 | 4.290778  | -0.930080 |
| 50 | 1 | 0 | -7.777187 | -0.609277 | -0.744494 |
| 51 | 1 | 0 | -6.764872 | 0.682239  | -0.093766 |
| 52 | 1 | 0 | -6.622516 | 0.216506  | -1.792382 |
| 53 | 1 | 0 | -6.868426 | -2.229088 | 1.077406  |
| 54 | 1 | 0 | -5.125825 | -2.437780 | 1.223512  |
| 55 | 1 | 0 | -5.880692 | -0.912319 | 1.713863  |
| 56 | 6 | 0 | 7.852681  | 0.744166  | -1.521047 |
| 57 | 1 | 0 | 8.869761  | 1.092396  | -1.383142 |
| 58 | 1 | 0 | 7.868716  | -0.256802 | -1.951038 |
| 59 | 1 | 0 | 7.326148  | 1.422808  | -2.191253 |

**M05/6-31G\***

panisaldehydeDIPESiTSM05G

E(RM05+HF-M05) = -1443.53896591

|                                            |              |
|--------------------------------------------|--------------|
| Zero-point correction=                     | 0.490981     |
| (Hartree/Particle)                         |              |
| Thermal correction to Energy=              | 0.521464     |
| Thermal correction to Enthalpy=            | 0.522408     |
| Thermal correction to Gibbs Free Energy=   | 0.425607     |
| Sum of electronic and zero-point Energies= | -1443.047985 |
| Sum of electronic and thermal Energies=    | -1443.017502 |

Sum of electronic and thermal Enthalpies= -1443.016557  
 Sum of electronic and thermal Free Energies= -1443.113359

|       | E (Thermal)<br>KCal/Mol | CV<br>Cal/Mol-Kelvin | S<br>Cal/Mol-Kelvin |
|-------|-------------------------|----------------------|---------------------|
| Total | 327.224                 | 113.736              | 203.737             |

C,0,5.2196769997,-0.1024685703,-1.2336052475  
 C,0,3.9001832556,-0.4494077681,-0.9703535033  
 C,0,3.375026891,-0.3633539165,0.3216721387  
 C,0,4.2071652447,0.0861230882,1.357934914  
 C,0,5.5215763806,0.435324089,1.1118359066  
 C,0,6.0407531413,0.3424779014,-0.1888135721  
 C,0,1.9761485393,-0.7054966382,0.6006213887  
 O,0,1.1642898955,-0.8423046911,-0.382260527  
 B,0,-0.2390137701,-1.3666865899,-0.1200268815  
 O,0,-0.8620249607,-0.7645148738,1.0440917487  
 C,0,-1.8043732766,0.1403673826,0.5883242709  
 C,0,-1.2421361727,1.5601880315,0.5305076879  
 O,0,-0.1019355733,1.8700737503,0.7809093609  
 O,0,7.3319553118,0.7066282098,-0.3303511903  
 O,0,-1.0636968554,-1.0771875916,-1.256581528  
 C,0,-2.1873628552,-0.3952514439,-0.8251510891  
 C,0,-3.3934562185,-1.3229923152,-0.7043964694  
 O,0,-3.3439836888,-2.5251131181,-0.5996668806  
 C,0,0.0419911928,-3.0307124787,0.1471534512  
 C,0,0.8873094956,-3.0192467271,1.3043951089  
 C,0,2.2423694574,-2.791981229,1.2567128757  
 O,0,-4.5255083555,-0.5979611107,-0.6881142298  
 C,0,-5.7725739207,-1.3031258936,-0.4872116133  
 C,0,-6.0007586065,-1.500810223,0.998931633  
 C,0,-6.8427270223,-0.4742808861,-1.1642308229  
 O,0,-2.2088608781,2.4193058282,0.1698063177  
 C,0,-1.8606405749,3.8198115519,0.0552591374  
 C,0,-1.9661656195,4.4761439815,1.4180480088  
 C,0,-2.7990972321,4.4046340165,-0.9779953549  
 H,0,-2.6751298639,0.1686436907,1.2556646467  
 H,0,-2.4457421335,0.4211745236,-1.5068690029  
 H,0,0.5027406954,-3.4249132762,-0.7590511548  
 H,0,-0.9636242089,-3.4236358776,0.2961424373  
 H,0,0.3922795714,-2.922366324,2.2703531543  
 H,0,2.8243982473,-2.7219815795,2.1716997983  
 H,0,2.8012214466,-3.0377093729,0.3579811821  
 H,0,1.5630001565,-0.3791548255,1.5559249246  
 H,0,-0.8257907319,3.8681834549,-0.2940549667  
 H,0,-5.675560933,-2.2772514595,-0.9743633659  
 H,0,3.8115775681,0.1682921621,2.3670749996  
 H,0,6.1721701299,0.7895896203,1.9040334973  
 H,0,5.5966927394,-0.1740180812,-2.2471643444  
 H,0,3.2548722047,-0.7814867133,-1.7771344401  
 H,0,-1.7289413572,5.5413395673,1.3435550614  
 H,0,-2.9798454149,4.3775717256,1.8177788084  
 H,0,-1.2639991115,4.0208076322,2.119719137  
 H,0,-2.5730487941,5.4627354199,-1.1366358369  
 H,0,-2.6966319653,3.8851593973,-1.9339458699  
 H,0,-3.8395999948,4.3205913843,-0.6515340594  
 H,0,-7.8142066969,-0.968739489,-1.0762104452  
 H,0,-6.9188608021,0.5156273111,-0.7049044832  
 H,0,-6.6189622587,-0.3433516152,-2.2256762198  
 H,0,-6.95404759,-2.0084552451,1.172445789  
 H,0,-5.2068638392,-2.113662089,1.4313813998  
 H,0,-6.0260731596,-0.5371218959,1.5165757815  
 C,0,7.9282009153,0.637247382,-1.6056836814  
 H,0,8.9569909975,0.9723571781,-1.4742392738  
 H,0,7.9283702428,-0.3880185626,-1.9932827207

H,0,7.4227477161,1.2957751913,-2.3213503053

### Transition structures for reaction of 4 and 5 with Re facial attack

#### M062X/6-31+G\*\*

FullRoushAnisaldehydeTSReFacem06  
ts for addition to the re face with Rouse allylboronate  
E(RM062X) = -1443.90400633

Zero-point correction= 0.488395 (Hartree/Particle)  
Thermal correction to Energy= 0.518746  
Thermal correction to Enthalpy= 0.519690  
Thermal correction to Gibbs Free Energy= 0.423599  
Sum of electronic and ZPE= -1443.415611  
Sum of electronic and thermal Energies= -1443.385260  
Sum of electronic and thermal Enthalpies= -1443.384316  
Sum of electronic and thermal Free Energies= -1443.480407

| E             | CV        | S         |
|---------------|-----------|-----------|
| KCal/Mol      | Cal/Mol-K | Cal/Mol-K |
| Total 325.518 | 113.709   | 202.241   |

C,0,-5.3329527164,0.2282002045,-0.7737623388  
C,0,-3.9783324596,-0.0924002988,-0.7475669461  
C,0,-3.3902392642,-0.6045018832,0.4086982483  
C,0,-4.176678429,-0.7890356827,1.5543433889  
C,0,-5.5234835915,-0.47656385,1.5416780402  
C,0,-6.1096886082,0.031667499,0.3732633414  
C,0,-1.9589237671,-0.9370661548,0.4439974578  
O,0,-1.2204289064,-0.5648100356,-0.5377532575  
B,0,0.1969757812,-1.0430188273,-0.573995581  
O,0,1.0102221454,-0.3106374185,-1.5003371359  
C,0,1.9222497864,0.4529716161,-0.7750271904  
C,0,1.4102235152,1.8692903098,-0.5291273464  
O,0,0.2737579347,2.2377197756,-0.6801085168  
O,0,-7.4332444571,-0.3074967252,0.4545647097  
C,0,-8.0800585244,0.814723729,-0.6971769025  
O,0,0.8035002038,-0.9125728053,0.7425735359  
C,0,2.04186891,-0.2964676807,0.5888702835  
C,0,3.1633055646,-1.3274847523,0.5032778993  
O,0,3.0062875089,-2.5132189355,0.3441655854  
C,0,0.0147982238,-2.6839372097,-1.0603184856  
C,0,-0.7610579142,-3.2301942151,0.0145694618  
C,0,-2.1250706214,-3.1029453765,0.0986579668  
O,0,4.3572082687,-0.7240111366,0.6001013113  
C,0,5.5307314842,-1.5506125857,0.4209178721  
C,0,5.7475084595,-1.7946014794,-1.0639444706  
C,0,6.6742748329,-0.7974729954,1.073250726  
O,0,2.4105507383,2.6472580755,-0.0775996749  
C,0,2.080616087,4.0156627042,0.252532337  
C,0,2.0198710152,4.8423652921,-1.0220809869  
C,0,3.1569768309,4.4838990649,1.2133147856  
H,0,-3.3602766824,0.0691300285,-1.6255400772  
H,0,-3.7229632781,-1.1829300761,2.4608976243  
H,0,-6.1488942846,-0.6104248384,2.4176684564  
H,0,-5.7659700868,0.6320774927,-1.6806020561  
H,0,-1.4863679193,-1.0568875807,1.4211958558  
H,0,2.2619536581,0.3856376727,1.4171923201  
H,0,5.34555124,-2.4997179986,0.9336275867  
H,0,1.0459110531,-3.0347945111,-1.1025178498  
H,0,-0.4781340285,-2.6721379363,-2.0339996211  
H,0,-0.214243981,-3.535252768,0.9075010211  
H,0,-2.6675474568,-3.4598239181,0.969202095

H,0,-2.7111661904,-2.9291577761,-0.7997572476  
H,0,2.8849519854,0.5205652415,-1.2934621971  
H,0,1.0995169978,4.0090447573,0.7385909081  
H,0,2.9599363052,5.5148939014,1.5201901165  
H,0,3.1837823539,3.8527387921,2.1049634274  
H,0,4.1381398585,4.4455034672,0.730495369  
H,0,1.7805197349,5.882463708,-0.7817645101  
H,0,2.9889809891,4.8170592647,-1.5302814482  
H,0,1.2504367685,4.4565286485,-1.6941642193  
H,0,7.5974392479,-1.377809847,0.9910978325  
H,0,6.8234547371,0.166824588,0.5782700243  
H,0,6.4670186936,-0.6175990748,2.1308239777  
H,0,6.6389297728,-2.410079231,-1.2161676534  
H,0,4.8911574069,-2.3142814289,-1.499654787  
H,0,5.8917760256,-0.8408571052,-1.5815030802  
H,0,-9.123108207,0.9554383526,-0.417019851  
H,0,-7.6496929472,1.7762717629,-0.999731259  
H,0,-8.0166997974,0.1047427395,-1.5297418756

#### M062X/6-31+G\*\*/PCM

FullRoushAnisaldehydeTSReFacem06PCM  
ts for addition to the re face with Rouse allylboronate  
E(RM062X) = -1443.92236947

Zero-point correction= 0.487559 (Hartree/Particle)  
Thermal correction to Energy= 0.518000  
Thermal correction to Enthalpy= 0.518944  
Thermal correction to Gibbs Free Energy= 0.422507  
Sum of electronic and ZPE= -1443.434811  
Sum of electronic and thermal Energies= -1443.404370  
Sum of electronic and thermal Enthalpies= -1443.403426  
Sum of electronic and thermal Free Energies= -1443.499862

| E             | CV        | S         |
|---------------|-----------|-----------|
| KCal/Mol      | Cal/Mol-K | Cal/Mol-K |
| Total 325.050 | 113.938   | 202.968   |

C,0,-5.3875508175,0.170421564,-0.7670505913  
C,0,-4.0358253963,-0.1587209653,-0.7423934219  
C,0,-3.4404998766,-0.6476198237,0.4219440432  
C,0,-4.2201292898,-0.8087148551,1.5767615061  
C,0,-5.5652976622,-0.4869424406,1.5657797574  
C,0,-6.1572070361,0.0029871775,0.3912535322  
C,0,-2.0123595826,-0.9869795606,0.4611090393  
O,0,-1.2540124508,-0.5705215906,-0.4966637064  
B,0,0.1622136578,-1.0447764227,-0.5448920153  
O,0,0.9535998838,-0.2940781824,-1.4879916409  
C,0,1.8961125638,0.4585198586,-0.786148473  
C,0,1.43381198,1.8952735537,-0.5591993094  
O,0,0.3186659013,2.3115936851,-0.7682628547  
O,0,-7.4764732774,0.2893316151,0.4732704398  
C,0,-8.1294762582,0.7807395329,-0.6898868244  
O,0,0.7949367433,-0.8994230533,0.7584256945  
C,0,2.0274210904,-0.2734865002,0.5853925214  
C,0,3.165091636,-1.2890303563,0.5174726598  
O,0,3.0196853536,-2.4863886814,0.4267062746  
C,0,0.0004076516,-2.6791478141,-1.0322929171  
C,0,-0.8185565489,-3.2433166456,0.0058032481  
C,0,-2.1840533151,-3.1136672199,0.0356714709  
O,0,4.3441637293,-0.6638935083,0.5514898952  
C,0,5.5410036078,-1.4723217284,0.3959490143  
C,0,5.7446719187,-1.7755674356,-1.0788727056  
C,0,6.6716339358,-0.6650063646,1.0020535649  
O,0,2.4399609426,2.6242282869,-0.0663045366  
C,0,2.172378776,4.0143211441,0.258325262

C,0,2.2282082838,4.8457179931,-1.0120807748  
 C,0,3.2222658401,4.4117452807,1.2771312725  
 H,0,-3.431493799,-0.0288670224,-1.6350114429  
 H,0,-3.7648488001,-1.1897651606,2.4875841933  
 H,0,-6.181533022,-0.601204903,2.451222638  
 H,0,-5.825261955,0.5531833807,-1.6805072415  
 H,0,-1.5586452472,-1.1349395029,1.4429004655  
 H,0,2.2431797268,0.4228853689,1.4027640525  
 H,0,5.3826620418,-2.3981748265,0.9563965151  
 H,0,1.0292164854,-3.040521969,-1.0452953929  
 H,0,-0.4594914942,-2.669455853,-2.0227581546  
 H,0,-0.3158262435,-3.5734530672,0.9154736668  
 H,0,-2.7600847868,-3.4838571118,0.878225364  
 H,0,-2.731001124,-2.9166524972,-0.8825635724  
 H,0,2.8505481478,0.4941501689,-1.3229509904  
 H,0,1.1706824375,4.0584622862,0.695983536  
 H,0,3.0620108932,5.4480922956,1.5858418554  
 H,0,3.1682676737,3.7720089428,2.1613573239  
 H,0,4.2229457095,4.3291001117,0.8424212028  
 H,0,2.0294393805,5.894568272,-0.7750776871  
 H,0,3.2223402741,4.7736471275,-1.4638739697  
 H,0,1.4812291824,4.5059418122,-1.7327939566  
 H,0,7.6036153283,-1.2326406966,0.938241844  
 H,0,6.8004629875,0.2768915785,0.4603847838  
 H,0,6.4700298058,-0.4428459588,2.0526309894  
 H,0,6.6467754239,-2.3792160316,-1.2114456227  
 H,0,4.8954174025,-2.3306259221,-1.484393654  
 H,0,5.8646833183,-0.843217345,-1.6393848657  
 H,0,-9.168710397,0.9355445323,-0.4054406201  
 H,0,-7.690732261,1.7307524242,-1.0116825608  
 H,0,-8.0755090731,0.0518010232,-1.5049611244

**B3LYP/6-31G\***

panisaldehydeDIPEReTSB3G

E(RB+HF-LYP) = -1444.42728662

Zero-point correction= 0.485997  
 (Hartree/Particle)  
 Thermal correction to Energy= 0.516686  
 Thermal correction to Enthalpy= 0.517630  
 Thermal correction to Gibbs Free Energy= 0.420630  
 Sum of electronic and zero-point Energies= -1443.941290  
 Sum of electronic and thermal Energies= -1443.910600  
 Sum of electronic and thermal Enthalpies= -1443.909656  
 Sum of electronic and thermal Free Energies= -1444.006656

|       | E (Thermal) | CV             | S              |
|-------|-------------|----------------|----------------|
|       | KCal/Mol    | Cal/Mol-Kelvin | Cal/Mol-Kelvin |
| Total | 324.225     | 114.590        | 204.153        |

C,0,-5.4729347486,0.19631087,-0.6715443294  
 C,0,-4.1221738527,-0.1424050393,-0.6835250524  
 C,0,-3.5190045589,-0.7405269898,0.4304831217  
 C,0,-4.3038573741,-0.9916255678,1.5705826697  
 C,0,-5.6485825917,-0.6610237018,1.5943329772  
 C,0,-6.2452213524,-0.0647367665,0.4701460581  
 C,0,-2.0889857073,-1.0795425353,0.4336463137  
 O,0,-1.3417195998,-0.5992210518,-0.5128725284  
 B,0,0.0890999079,-1.0167366662,-0.6107011241  
 O,0,0.8384737269,-0.2177665057,-1.5339221546  
 C,0,1.8322886037,0.4743329478,-0.8336612271  
 C,0,1.4359717008,1.9313319527,-0.5711854301  
 O,0,0.3131767447,2.3764338611,-0.6230812264  
 O,0,-7.5686251242,0.22349072,0.5913960203  
 C,0,-8.2326152395,0.8393662133,-0.5038712244

O,0,0.7527190406,-0.9669274487,0.6777526304  
 C,0,1.9739095445,-0.3060641676,0.5263747937  
 C,0,3.1402640334,-1.2990996186,0.4587773825  
 O,0,3.0367388227,-2.4914695635,0.2701316233  
 C,0,-0.0512877921,-2.6610870937,-1.2151769997  
 C,0,-0.8023358213,-3.3065576776,-0.1838513264  
 C,0,-2.1737573272,-3.1977960027,-0.0605135307  
 O,0,4.310258995,-0.6451625569,0.621189958  
 C,0,5.5372058729,-1.4307588923,0.5361821458  
 C,0,5.9362699399,-1.5917934641,-0.9269878015  
 C,0,6.5691047287,-0.6863703449,1.371674788  
 O,0,2.5361850792,2.6465700732,-0.2359389666  
 C,0,2.3407084102,4.0496800884,0.1079310008  
 C,0,2.3088193751,4.883643689,-1.1689430206  
 C,0,3.4823131655,4.415137665,1.0465925945  
 H,0,-3.515470699,0.0722909015,-1.5571740488  
 H,0,-3.8488264219,-1.448327877,2.4466181436  
 H,0,-6.2624905907,-0.8460456379,2.469889596  
 H,0,-5.9103797703,0.6666337969,-1.5444740044  
 H,0,-1.6203358365,-1.2480815824,1.4041053371  
 H,0,2.1617448292,0.3766560869,1.363281684  
 H,0,5.3232220489,-2.412185714,0.969371636  
 H,0,0.9890753836,-2.9768138131,-1.2922629249  
 H,0,-0.5457554409,-2.5855535381,-2.1860794445  
 H,0,-0.2373132354,-3.6638518483,0.677317864  
 H,0,-2.6913816924,-3.6492020267,0.7817508901  
 H,0,-2.7828485988,-3.0126595098,-0.9407341718  
 H,0,2.7739082867,0.4778250569,-1.3942100366  
 H,0,1.3773996509,4.1282446996,0.6208155044  
 H,0,3.384168835,5.4569551665,1.3710912044  
 H,0,3.4770222652,3.7745944825,1.93420781  
 H,0,4.4495581703,4.300098941,0.5449835797  
 H,0,2.1805975311,5.9443050779,-0.9242514119  
 H,0,3.2447960968,4.7690015481,-1.7272587769  
 H,0,1.4753835978,4.5748557626,-1.8055077726  
 H,0,7.5166180375,-1.2362444634,1.3756928033  
 H,0,6.7522082821,0.3133198963,0.9625771195  
 H,0,6.227924427,-0.5783335413,2.4060642525  
 H,0,6.8664107406,-2.1664876778,-1.0025775615  
 H,0,5.1593840672,-2.1259548412,-1.4809379777  
 H,0,6.0973260865,-0.6131432308,-1.3930497917  
 H,0,-9.2679144099,0.9734590038,-0.1862585128  
 H,0,-7.7950957308,1.8176909685,-0.7401254135  
 H,0,-8.2061825115,0.2041954871,-1.3984967103

**B3LYP/6-31+G\*\***

panisaldehydeDIPEReTSB3+G

E(RB+HF-LYP) = -1444.51745011

Zero-point correction= 0.482770  
 (Hartree/Particle)  
 Thermal correction to Energy= 0.513692  
 Thermal correction to Enthalpy= 0.514636  
 Thermal correction to Gibbs Free Energy= 0.416547  
 Sum of electronic and zero-point Energies= -1444.034681  
 Sum of electronic and thermal Energies= -1444.003758  
 Sum of electronic and thermal Enthalpies= -1444.002814  
 Sum of electronic and thermal Free Energies= -1444.100903

|       | E (Thermal) | CV             | S              |
|-------|-------------|----------------|----------------|
|       | KCal/Mol    | Cal/Mol-Kelvin | Cal/Mol-Kelvin |
| Total | 322.346     | 115.314        | 206.445        |

C,0,-5.4945556552,0.2275411572,-0.5994871673  
 C,0,-4.1474723584,-0.1322783311,-0.6382120637



C,0,-3.5479505407,-0.7986007611,0.4387278712  
 C,0,-4.3315454532,-1.0969381695,1.5693972569  
 C,0,-5.6725311094,-0.7472071414,1.6198840947  
 C,0,-6.2648717625,-0.0827461411,0.5318339647  
 C,0,-2.1218742992,-1.1610126803,0.4192400623  
 O,0,-1.3702239086,-0.634941346,-0.504042551  
 B,0,0.0551275515,-1.041384342,-0.6315601611  
 O,0,0.7923077291,-0.2094485524,-1.538918534  
 C,0,1.8050303457,0.4614717967,-0.8417241484  
 C,0,1.4361752125,1.9231111023,-0.5591259225  
 O,0,0.3115339603,2.3689734901,-0.509466227  
 O,0,-7.5847762295,0.2219633029,0.6739726717  
 C,0,-8.2503261821,0.9040345388,-0.3850724524  
 O,0,0.7439564231,-1.0268527852,0.6456184309  
 C,0,1.9549487721,-0.3402788585,0.5093143107  
 C,0,3.1441837099,-1.3063716512,0.4351417437  
 O,0,3.0732848176,-2.485468972,0.1588662289  
 C,0,-0.0805260319,-2.6704807728,-1.2949469672  
 C,0,-0.8494533787,-3.3543034769,-0.3050465422  
 C,0,-2.2235474903,-3.2285400643,-0.1879790817  
 O,0,4.2916272621,-0.6495119961,0.7047669408  
 C,0,5.5470466302,-1.3967359375,0.6217443975  
 C,0,6.0422632568,-1.3958489645,-0.8207683261  
 C,0,6.5029381845,-0.7207194171,1.5944430544  
 O,0,2.5601013527,2.6444575616,-0.3404230939  
 C,0,2.4080808831,4.0583004775,-0.0009194867  
 C,0,2.3304901618,4.8762364609,-1.2860589482  
 C,0,3.6001676843,4.4138597761,0.8767022602  
 H,0,-3.543197022,0.1226573719,-1.5025020189  
 H,0,-3.8805558641,-1.6050768236,2.418309163  
 H,0,-6.2823331443,-0.9691641462,2.4893085075  
 H,0,-5.9269176823,0.7515209923,-1.4433191992  
 H,0,-1.6556436261,-1.3755617399,1.3818086685  
 H,0,2.1212537133,0.3299352866,1.3598764232  
 H,0,5.3325109363,-2.4211444988,0.939295319  
 H,0,0.9616329893,-2.9797182849,-1.3691958035  
 H,0,-0.5620213351,-2.5392568907,-2.2658108122  
 H,0,-0.303287357,-3.774832035,0.5394880378  
 H,0,-2.7518297086,-3.7205876069,0.623609143  
 H,0,-2.820321392,-2.9893586059,-1.0632444234  
 H,0,2.7357172942,0.4586258401,-1.4188023025  
 H,0,1.4726439791,4.1586948122,0.5571336424  
 H,0,3.5339018053,5.4614506659,1.1887198796  
 H,0,3.6258903049,3.7878687996,1.7734442816  
 H,0,4.5397997556,4.2754282854,0.3315587384  
 H,0,2.2216099411,5.9395955962,-1.0463628551  
 H,0,3.242205598,4.7478994758,-1.8793741768  
 H,0,1.4698161084,4.5718227604,-1.8869474357  
 H,0,7.4625719752,-1.2479590663,1.6001110223  
 H,0,6.6825169516,0.3196818867,1.3039399917  
 H,0,6.0977035988,-0.7314460518,2.6104943991  
 H,0,6.9860916825,-1.9474085291,-0.8904036106  
 H,0,5.3184098286,-1.8790386084,-1.4822468115  
 H,0,6.2155696773,-0.3718287829,-1.1685205456  
 H,0,-9.2795434574,1.0359544274,-0.0501892171  
 H,0,-7.7987329915,1.8857518537,-0.5720371525  
 H,0,-8.2399120964,0.312082313,-1.308255468

### B3LYP/6-31+G\*\* PCM solvent model for dichloromethane

panisaldehydeDIPEReTSPCMB3PSaltnative

E(RB+HF-LYP) = -1444.54071075

Zero-point correction= 0.481090  
 (Hartree/Particle)  
 Thermal correction to Energy= 0.512014

Thermal correction to Enthalpy= 0.512958  
 Thermal correction to Gibbs Free Energy= 0.415035  
 Sum of electronic and zero-point Energies= -1444.059621  
 Sum of electronic and thermal Energies= -1444.028697  
 Sum of electronic and thermal Enthalpies= -1444.027753  
 Sum of electronic and thermal Free Energies= -1444.125676

|       |   | E (Thermal) | CV             | S              |
|-------|---|-------------|----------------|----------------|
|       |   | KCal/Mol    | Cal/Mol-Kelvin | Cal/Mol-Kelvin |
| Total |   | 321.294     | 115.483        | 206.097        |
| 1     | 6 | 0           | -5.474599      | 0.683741       |
| 2     | 6 | 0           | -4.161601      | 0.215493       |
| 3     | 6 | 0           | -3.608203      | -0.513958      |
| 4     | 6 | 0           | -4.405057      | -0.772309      |
| 5     | 6 | 0           | -5.713395      | -0.314955      |
| 6     | 6 | 0           | -6.257888      | 0.415689       |
| 7     | 6 | 0           | -2.220193      | -1.002283      |
| 8     | 8 | 0           | -1.394393      | -0.461637      |
| 9     | 5 | 0           | -0.013884      | -0.989354      |
| 10    | 8 | 0           | 0.789806       | -0.157693      |
| 11    | 6 | 0           | 1.879467       | 0.365620       |
| 12    | 6 | 0           | 1.687283       | 1.848873       |
| 13    | 8 | 0           | 0.627298       | 2.444190       |
| 14    | 8 | 0           | -7.548650      | 0.822345       |
| 15    | 6 | 0           | -8.167383      | 1.576387       |
| 16    | 8 | 0           | 0.688455       | -1.092706      |
| 17    | 6 | 0           | 1.956739       | -0.507099      |
| 18    | 6 | 0           | 3.064595       | -1.565038      |
| 19    | 8 | 0           | 2.882647       | -2.745589      |
| 20    | 6 | 0           | -0.274884      | -2.548570      |
| 21    | 6 | 0           | -1.141562      | -3.221531      |
| 22    | 6 | 0           | -2.500001      | -0.965269      |
| 23    | 8 | 0           | 4.261876       | -0.995505      |
| 24    | 6 | 0           | 5.469298       | -1.827267      |
| 25    | 6 | 0           | 5.931475       | -1.861891      |
| 26    | 6 | 0           | 6.484255       | -1.206596      |
| 27    | 8 | 0           | 2.863440       | 2.390122       |
| 28    | 6 | 0           | 2.897609       | 3.800128       |
| 29    | 6 | 0           | 3.030478       | 4.678233       |
| 30    | 6 | 0           | 4.068704       | 3.926165       |
| 31    | 1 | 0           | -3.555805      | 0.429825       |
| 32    | 1 | 0           | -3.990301      | -1.334383      |
| 33    | 1 | 0           | -6.331283      | -0.506977      |
| 34    | 1 | 0           | -5.867629      | 1.251514       |
| 35    | 1 | 0           | -1.805156      | -1.326994      |
| 36    | 1 | 0           | 2.177825       | 0.106957       |
| 37    | 1 | 0           | 5.196134       | -2.833624      |
| 38    | 1 | 0           | 0.730952       | -2.963052      |
| 39    | 1 | 0           | -0.713970      | -2.324032      |
| 40    | 1 | 0           | -0.676015      | -3.756760      |
| 41    | 1 | 0           | -3.104597      | -3.455879      |
| 42    | 1 | 0           | -3.032656      | -2.610709      |
| 43    | 1 | 0           | 2.797630       | 0.287212       |
| 44    | 1 | 0           | 1.953116       | 4.011407       |
| 45    | 1 | 0           | 4.138445       | 4.957417       |
| 46    | 1 | 0           | 3.938398       | 3.266432       |
| 47    | 1 | 0           | 5.010473       | 3.669588       |
| 48    | 1 | 0           | 3.055353       | 5.732478       |
| 49    | 1 | 0           | 3.957230       | 4.449958       |
| 50    | 1 | 0           | 2.183667       | 4.534560       |
| 51    | 1 | 0           | 7.405789       | -1.797793      |
| 52    | 1 | 0           | 6.727456       | -0.183093      |
| 53    | 1 | 0           | 6.099854       | -1.184960      |
| 54    | 1 | 0           | 6.833982       | -2.476652      |

|    |   |   |           |           |           |
|----|---|---|-----------|-----------|-----------|
| 55 | 1 | 0 | 5.164230  | -2.295258 | -1.617625 |
| 56 | 1 | 0 | 6.167682  | -0.852926 | -1.324482 |
| 57 | 1 | 0 | -9.180472 | 1.783269  | -0.033559 |
| 58 | 1 | 0 | -7.637857 | 2.520476  | -0.551086 |
| 59 | 1 | 0 | -8.207719 | 0.999188  | -1.310279 |

**MPW1K/6-31+G\*\* PCM solvent model for dichloromethane**

panisaldehydeDIPEReTSPCMmpw1kPSalternative

E(RmPW+HF-PW91) = -1444.09392090

|                                              |              |
|----------------------------------------------|--------------|
| Zero-point correction=                       | 0.497028     |
| (Hartree/Particle)                           |              |
| Thermal correction to Energy=                | 0.527115     |
| Thermal correction to Enthalpy=              | 0.528059     |
| Thermal correction to Gibbs Free Energy=     | 0.431768     |
| Sum of electronic and zero-point Energies=   | -1443.596893 |
| Sum of electronic and thermal Energies=      | -1443.566806 |
| Sum of electronic and thermal Enthalpies=    | -1443.565861 |
| Sum of electronic and thermal Free Energies= | -1443.662153 |

|       | E (Thermal) | CV             | S              |
|-------|-------------|----------------|----------------|
|       | KCal/Mol    | Cal/Mol-Kelvin | Cal/Mol-Kelvin |
| Total | 330.770     | 111.814        | 202.662        |

|    |   |   |           |           |           |
|----|---|---|-----------|-----------|-----------|
| 1  | 6 | 0 | -5.282080 | 0.431842  | -0.759501 |
| 2  | 6 | 0 | -3.968092 | -0.004444 | -0.760267 |
| 3  | 6 | 0 | -3.399855 | -0.559533 | 0.380631  |
| 4  | 6 | 0 | -4.174894 | -0.674538 | 1.536710  |
| 5  | 6 | 0 | -5.483405 | -0.246652 | 1.550353  |
| 6  | 6 | 0 | -6.046104 | 0.308664  | 0.399656  |
| 7  | 6 | 0 | -2.006950 | -1.001201 | 0.405035  |
| 8  | 8 | 0 | -1.219910 | -0.604805 | -0.529731 |
| 9  | 5 | 0 | 0.163354  | -1.159229 | -0.589823 |
| 10 | 8 | 0 | 0.967947  | -0.447118 | -1.541675 |
| 11 | 6 | 0 | 1.897594  | 0.316203  | -0.853917 |
| 12 | 6 | 0 | 1.472069  | 1.771836  | -0.735061 |
| 13 | 8 | 0 | 0.572184  | 2.274146  | -1.354830 |
| 14 | 8 | 0 | -7.326583 | 0.699747  | 0.504329  |
| 15 | 6 | 0 | -7.954972 | 1.269449  | -0.620449 |
| 16 | 8 | 0 | 0.820045  | -1.029805 | 0.694140  |
| 17 | 6 | 0 | 2.031499  | -0.385152 | 0.515451  |
| 18 | 6 | 0 | 3.194330  | -1.363172 | 0.519060  |
| 19 | 8 | 0 | 3.092234  | -2.558647 | 0.613469  |
| 20 | 6 | 0 | -0.077119 | -2.765966 | -1.061982 |
| 21 | 6 | 0 | -0.963712 | -3.288223 | -0.064092 |
| 22 | 6 | 0 | -2.312010 | -3.068017 | -0.073913 |
| 23 | 8 | 0 | 4.339402  | -0.709197 | 0.420223  |
| 24 | 6 | 0 | 5.566435  | -1.465318 | 0.392015  |
| 25 | 6 | 0 | 5.847350  | -1.902150 | -1.026819 |
| 26 | 6 | 0 | 6.630643  | -0.558408 | 0.957286  |
| 27 | 8 | 0 | 2.265242  | 2.420968  | 0.100945  |
| 28 | 6 | 0 | 2.078370  | 3.840581  | 0.268080  |
| 29 | 6 | 0 | 2.842701  | 4.569544  | -0.812152 |
| 30 | 6 | 0 | 2.557716  | 4.165890  | 1.660588  |
| 31 | 1 | 0 | -3.373174 | 0.096112  | -1.658350 |
| 32 | 1 | 0 | -3.743339 | -1.101959 | 2.434552  |
| 33 | 1 | 0 | -6.090323 | -0.327407 | 2.442275  |
| 34 | 1 | 0 | -5.691620 | 0.864919  | -1.659106 |
| 35 | 1 | 0 | -1.578129 | -1.194124 | 1.385663  |
| 36 | 1 | 0 | 2.220174  | 0.330539  | 1.315082  |
| 37 | 1 | 0 | 5.428332  | -2.336324 | 1.031410  |
| 38 | 1 | 0 | 0.915851  | -3.204482 | -1.044671 |
| 39 | 1 | 0 | -0.497276 | -2.738316 | -2.064573 |
| 40 | 1 | 0 | -0.518918 | -3.674909 | 0.848901  |
| 41 | 1 | 0 | -2.932227 | -3.428766 | 0.734387  |

|    |   |   |           |           |           |
|----|---|---|-----------|-----------|-----------|
| 42 | 1 | 0 | -2.814856 | -2.828813 | -1.000837 |
| 43 | 1 | 0 | 2.848168  | 0.334757  | -1.390893 |
| 44 | 1 | 0 | 1.012368  | 4.043769  | 0.174342  |
| 45 | 1 | 0 | 2.431348  | 5.229237  | 1.853643  |
| 46 | 1 | 0 | 1.990525  | 3.613176  | 2.405919  |
| 47 | 1 | 0 | 3.612073  | 3.919788  | 1.772674  |
| 48 | 1 | 0 | 2.707135  | 5.643585  | -0.699453 |
| 49 | 1 | 0 | 3.906501  | 4.348810  | -0.742288 |
| 50 | 1 | 0 | 2.487437  | 4.286009  | -1.799724 |
| 51 | 1 | 0 | 7.583951  | -1.082324 | 0.983478  |
| 52 | 1 | 0 | 6.744820  | 0.332064  | 0.341791  |
| 53 | 1 | 0 | 6.380286  | -0.250658 | 1.969745  |
| 54 | 1 | 0 | 6.772903  | -2.473868 | -1.060747 |
| 55 | 1 | 0 | 5.046974  | -2.532070 | -1.406904 |
| 56 | 1 | 0 | 5.955865  | -1.036545 | -1.678348 |
| 57 | 1 | 0 | -8.967048 | 1.503162  | -0.310970 |
| 58 | 1 | 0 | -7.451490 | 2.184413  | -0.930706 |
| 59 | 1 | 0 | -7.984670 | 0.566647  | -1.452421 |

**Prereactive Complex Used in Polyrate Calculation****M062X/6-31+G\*\***This structure was optimized with the Gaussian options  
int(grid=ultrafine) and nosymm.

anisaldehydeAllylBegPrereactiveM062X

allylboration anisaldehyde prereactive complex

E(RM062X) = -831.115237698

Zero-point correction= 0.287347 (Hartree/Particle)

Thermal correction to Energy= 0.306160

Thermal correction to Enthalpy= 0.307104

Thermal correction to Gibbs Free Energy= 0.237042

Sum of electronic and ZPE= -830.827890

Sum of electronic and thermal Energies= -830.809078

Sum of electronic and thermal Enthalpies= -830.808134

Sum of electronic and thermal Free Energies= -830.878195

| E        | CV        | S         |         |
|----------|-----------|-----------|---------|
| KCal/Mol | Cal/Mol-K | Cal/Mol-K |         |
| Total    | 192.118   | 67.151    | 147.457 |

|                                               |
|-----------------------------------------------|
| C,0,3.6424102638,2.065315018,-2.4988226407    |
| C,0,2.4306730618,1.6682419196,-3.0533961509   |
| C,0,2.1837346251,1.829733342,-4.4171685046    |
| C,0,3.1682818031,2.4027555375,-5.2326002139   |
| C,0,4.3791742252,2.8042639439,-4.69704983     |
| C,0,4.6202543182,2.6360445344,-3.3255889221   |
| C,0,0.8953473599,1.4191406745,-5.0039975498   |
| O,0,-0.0217117232,0.9367435415,-4.3645597728  |
| B,0,-2.1696342381,1.853193414,-5.6556075716   |
| C,0,-2.0245522869,3.3519327742,-5.1931609117  |
| C,0,-0.8879061184,4.0699169184,-5.8584961473  |
| C,0,0.1797043508,4.562358254,-5.227570734     |
| O,0,5.8299717452,3.0566039859,-2.8889353652   |
| O,0,-2.9584339647,0.9360587918,-5.0128872776  |
| C,0,-2.6684716475,-0.3419273002,-5.5777089736 |
| C,0,-1.9388170277,-0.0245178878,-6.9007905371 |
| O,0,-1.5736775861,1.353060942,-6.7918355331   |
| H,0,-3.6001924611,-0.8926826451,-5.7266606235 |
| H,0,-2.5835094725,-0.1482729275,-7.7769782687 |
| H,0,-2.0248988019,-0.8875790847,-4.8816195441 |
| H,0,-1.912075288,3.3715362832,-4.1033500812   |
| H,0,-2.9722932418,3.8620983912,-5.4181006906  |
| H,0,-0.944875955,4.1583565452,-6.9436055041   |
| H,0,0.9833910794,5.0548612652,-5.7667021312   |

H,0,0.2845604353,4.4825333197,-4.1473534328  
 H,0,0.7854875185,1.5755473532,-6.0942714909  
 H,0,-1.0357439247,-0.6262189395,-7.0345171789  
 H,0,2.9708765591,2.538445404,-6.2934889176  
 H,0,5.1564851262,3.2519190793,-5.3064729979  
 H,0,3.8166719197,1.9312036746,-1.4383165971  
 H,0,1.6561245777,1.2266630009,-2.4332241819  
 C,0,6.1296146042,2.9173062331,-1.5127964771  
 H,0,7.1355982066,3.3138977338,-1.3845685147  
 H,0,5.4281722208,3.4912944375,-0.8969966153  
 H,0,6.1095257371,1.8644184724,-1.2098971162

### M062X/6-31+G\*\*/PCM

This structure was optimized with the Gaussian options  
 int(grid=ultrafine) and nosymm.

anisaldehydeAllylBegPrereactiveM062XPCM  
 allylboration anisaldehyde prereactive complex  
 E(RM062X) = -831.125637421

Zero-point correction= 0.287035 (Hartree/Particle)  
 Thermal correction to Energy= 0.305888  
 Thermal correction to Enthalpy= 0.306832  
 Thermal correction to Gibbs Free Energy= 0.236825  
 Sum of electronic and ZPE= -830.838602  
 Sum of electronic and thermal Energies= -830.819750  
 Sum of electronic and thermal Enthalpies= -830.818806  
 Sum of electronic and thermal Free Energies= -830.888813

| E             | CV        | S         |
|---------------|-----------|-----------|
| KCal/Mol      | Cal/Mol-K | Cal/Mol-K |
| Total 191.947 | 67.301    | 147.342   |

C,0,3.653045284,2.142067681,-2.4742340151  
 C,0,2.4294736035,1.7499852136,-3.0042481707  
 C,0,2.1896335927,1.8198807779,-4.3789049625  
 C,0,3.197073007,2.2946156716,-5.230782664  
 C,0,4.4208507773,2.6897850843,-4.7198400859  
 C,0,4.6533097487,2.6153382956,-3.3374217474  
 C,0,0.892260669,1.422665276,-4.9461608241  
 O,0,-0.0516360168,1.013393991,-4.2893389644  
 B,0,-2.1687657765,1.8371372892,-5.66193434  
 C,0,-2.0418206085,3.3248512512,-5.1594221705  
 C,0,-0.9047122603,4.0698395415,-5.7942788354  
 C,0,0.1610440551,4.5403165682,-5.1426157248  
 O,0,5.8737446258,3.0230000551,-2.9257741066  
 O,0,-2.9749982729,0.9025627101,-5.0593812216  
 C,0,-2.7001165339,-0.3597839079,-5.6785804111  
 C,0,-1.9607535389,0.0017813746,-6.9817437952  
 O,0,-1.5610810478,1.3672139306,-6.8029106406  
 H,0,-3.6379012618,-0.8894564202,-5.8555130588  
 H,0,-2.6090125631,-0.0604606261,-7.8604758541  
 H,0,-2.0708661888,-0.9461236817,-5.0032440247  
 H,0,-1.9418373839,3.3232056953,-4.0681019028  
 H,0,-2.9919282839,3.8295317221,-5.3872168851  
 H,0,-0.9597570374,4.201909549,-6.8751290831  
 H,0,0.9666347152,5.0504071455,-5.6623647221  
 H,0,0.2634266545,4.4180041027,-4.0658473796  
 H,0,0.7958330977,1.5155427516,-6.0439532283  
 H,0,-1.0736975951,-0.6141789539,-7.1452894377  
 H,0,3.0103616035,2.3570191261,-6.3002019284  
 H,0,5.2126130193,3.0614813452,-5.3612314279  
 H,0,3.8198822893,2.0798523046,-1.4060967953  
 H,0,1.6432294655,1.3847103695,-2.3503387827  
 C,0,6.1650591493,2.9776433946,-1.5347736774  
 H,0,7.1829587582,3.3487767912,-1.4320009398

H,0,5.4803238246,3.6198615027,-0.9721395383  
 H,0,6.1073924295,1.9518690783,-1.1576056537

### B3LYP/6-31+G\*\*

anisaldehydeAllylBegPrereactiveB3PS  
 allylboration anisaldehyde prereactive complex  
 E(RB3LYP) = -831.483720493

Zero-point correction= 0.283731 (Hartree/Particle)  
 Thermal correction to Energy= 0.303288  
 Thermal correction to Enthalpy= 0.304232  
 Thermal correction to Gibbs Free Energy= 0.228769  
 Sum of electronic and ZPE= -831.199989  
 Sum of electronic and thermal Energies= -831.180433  
 Sum of electronic and thermal Enthalpies= -831.179488  
 Sum of electronic and thermal Free Energies= -831.254951

| E             | CV        | S         |
|---------------|-----------|-----------|
| KCal/Mol      | Cal/Mol-K | Cal/Mol-K |
| Total 190.316 | 68.036    | 158.825   |

C,0,4.3056826503,1.3211330344,-2.4635335018  
 C,0,3.1296271975,0.8375032242,-3.0285458718  
 C,0,2.4478436126,1.5704805247,-4.0117827326  
 C,0,2.970190909,2.8113251513,-4.4228354209  
 C,0,4.141255203,3.3066861176,-3.8690890309  
 C,0,4.8161562646,2.5629778081,-2.8849189871  
 C,0,1.202792981,1.0679395821,-4.612101173  
 O,0,0.6581680559,0.0111291662,-4.3153602858  
 B,0,-2.4648880316,2.0903148165,-6.060038934  
 C,0,-2.5730708585,3.6566444691,-6.2225187486  
 C,0,-1.3499151922,4.3120773133,-6.8040171965  
 C,0,-0.6314509666,5.2743720795,-6.2147176659  
 O,0,5.9532831637,3.1265588562,-2.3995650271  
 O,0,-3.2286905536,1.3752323553,-5.1705654103  
 C,0,-2.8028844815,-0.0053618887,-5.2305543887  
 C,0,-1.8998230199,-0.0802744388,-6.4809642814  
 O,0,-1.6224337683,1.3017132321,-6.8077804488  
 H,0,-3.6861770579,-0.6462004431,-5.296721629  
 H,0,-2.4020439995,-0.5403870096,-7.3392335556  
 H,0,-2.2500122349,-0.2375692109,-4.3157984934  
 H,0,-2.8413739283,4.1103565148,-5.2610784314  
 H,0,-3.4325568287,3.8380465461,-6.8898628273  
 H,0,-1.0361530736,3.9489825942,-7.7828494664  
 H,0,0.2442993876,5.7028049652,-6.6943431923  
 H,0,-0.8992060921,5.6709571405,-5.2373177374  
 H,0,0.7548919328,1.7222422405,-5.3869132033  
 H,0,-0.9575723599,-0.5934253898,-6.282614192  
 H,0,2.4448038094,3.3874913747,-5.1806912485  
 H,0,4.5558438385,4.2615485458,-4.1744246754  
 H,0,4.8148900736,0.7376805718,-1.7060132819  
 H,0,2.7211426693,-0.1181647837,-2.7145259979  
 C,0,6.6939579891,2.4383161118,-1.3940595686  
 H,0,7.5463701969,3.0788302402,-1.1669005517  
 H,0,6.0936645409,2.2937350649,-0.4880751117  
 H,0,7.0526549713,1.4685475234,-1.7587827312

### B3LYP/6-31+G\*\*/PCM

anisaldehydeAllylBegPrereactiveB3PSPCM  
 allylboration anisaldehyde prereactive complex  
 E(RB3LYP) = -831.494308967

Zero-point correction= 0.283193 (Hartree/Particle)  
 Thermal correction to Energy= 0.302949  
 Thermal correction to Enthalpy= 0.303893

Thermal correction to Gibbs Free Energy= 0.226362  
 Sum of electronic and ZPE= -831.211116  
 Sum of electronic and thermal Energies= -831.191360  
 Sum of electronic and thermal Enthalpies= -831.190416  
 Sum of electronic and thermal Free Energies= -831.267947

E CV S  
 KCal/Mol Cal/Mol-K Cal/Mol-K  
 Total 190.103 68.272 163.177

C,0,4.7188264259,1.1438433937,-2.4568817163  
 C,0,3.5705427541,0.5967691444,-3.0188063874  
 C,0,2.7338351067,1.3644632082,-3.8469485867  
 C,0,3.075500435,2.7074616095,-4.1033125994  
 C,0,4.2167425883,3.2672922121,-3.550184223  
 C,0,5.0465725296,2.4879846323,-2.7220649844  
 C,0,1.5189956305,0.8035977584,-4.444914117  
 O,0,1.1178802342,-0.3485303199,-4.2918940999  
 B,0,-2.7415640203,2.1958768408,-6.2771986822  
 C,0,-2.9198174589,3.708558241,-6.6883685064  
 C,0,-1.648397232,4.4248696547,-7.0543805923  
 C,0,-1.1742689917,5.5204371843,-6.4493955128  
 O,0,6.1391272779,3.1174636038,-2.2247248544  
 O,0,-3.7098835569,1.4932029336,-5.5961206791  
 C,0,-3.1877522836,0.1708890342,-5.3159670824  
 C,0,-1.9104844963,0.0681681332,-6.1756392909  
 O,0,-1.6368598957,1.4355212012,-6.5783086016  
 H,0,-3.9420901078,-0.5737580846,-5.5793444331  
 H,0,-2.0637858826,-0.5290706937,-7.0799057804  
 H,0,-2.9767325552,0.1046981461,-4.2441880965  
 H,0,-3.4530251698,4.244379732,-5.893420837  
 H,0,-3.6001729813,3.707984272,-7.5565083378  
 H,0,-1.0789969192,3.9954806959,-7.8791784294  
 H,0,-0.2430737221,5.9840113266,-6.7634027592  
 H,0,-1.7018322416,5.988409275,-5.6203328172  
 H,0,0.9416526846,1.5051264669,-5.0787011093  
 H,0,-1.0509721511,-0.3173315984,-5.6238024112  
 H,0,2.4359659279,3.3110663357,-4.7422824114  
 H,0,4.4887287059,4.3001929258,-3.7403769145  
 H,0,5.3476679763,0.5322523637,-1.8218639548  
 H,0,3.3096593338,-0.4378553742,-2.8193059141  
 C,0,7.0342690282,2.3943943064,-1.3696624682  
 H,0,7.8179374443,3.102411191,-1.1023998365  
 H,0,6.521400232,2.0537651733,-0.4643270334  
 H,0,7.473671351,1.540221075,-1.8949829397

### Product Complex Used in Polyrate Calculation

#### M062X/6-31+G\*\*

This structure was optimized with the Gaussian options  
 int(grid=ultrafine) and nosymm.  
 anisaldehydeAllylBegProductM062X  
 anisaldehyde product complex  
 E(RM062X) = -831.166579084

Zero-point correction= 0.291575 (Hartree/Particle)  
 Thermal correction to Energy= 0.308809  
 Thermal correction to Enthalpy= 0.309753  
 Thermal correction to Gibbs Free Energy= 0.244477  
 Sum of electronic and ZPE= -830.875004  
 Sum of electronic and thermal Energies= -830.857770  
 Sum of electronic and thermal Enthalpies= -830.856826  
 Sum of electronic and thermal Free Energies= -830.922102

E CV S

KCal/Mol Cal/Mol-K Cal/Mol-K  
 Total 193.781 63.928 137.386

C,0,3.5825297317,2.2249952368,-2.5145094646  
 C,0,2.3534229131,2.1091159203,-3.1703334908  
 C,0,2.2204472333,2.446726648,-4.51239109  
 C,0,3.3485832051,2.9078038625,-5.2020118939  
 C,0,4.5738970223,3.0317761163,-4.566863221  
 C,0,4.6958207128,2.6904822405,-3.2143072708  
 C,0,0.8854251077,2.3820737742,-5.2170348179  
 O,0,0.0222208157,1.4999250498,-4.5103852791  
 B,0,-0.9421624025,0.8290143861,-5.1820395496  
 C,0,-2.2814741806,3.7985200448,-5.427772681  
 C,0,-1.0850102772,3.7434588578,-6.01362285  
 C,0,0.2183167018,3.7711417625,-5.269102874  
 O,0,5.937192342,2.8405039906,-2.6754326022  
 O,0,-1.9762099242,0.1878030213,-4.5410209457  
 C,0,-2.6876553379,-0.5457252158,-5.5358569493  
 C,0,-2.2359929767,0.0872674377,-6.8649201086  
 O,0,-0.9739114742,0.6751093847,-6.5556631898  
 H,0,-3.7615792112,-0.4520941915,-5.3610022595  
 H,0,-2.922124154,0.8788469361,-7.1897242573  
 H,0,-2.4046039926,-1.602203468,-5.4711808507  
 H,0,-2.3754988823,3.8977486486,-4.3490723242  
 H,0,-3.2003548627,3.7503983902,-6.0044190903  
 H,0,-1.0246909274,3.6223231757,-7.0953562396  
 H,0,0.91842647,4.4691537601,-5.742962861  
 H,0,0.0637760322,4.1008750157,-4.2351335023  
 H,0,1.0303366414,2.0102336596,-6.240355096  
 H,0,-2.1155961635,-0.6389223986,-7.6713581623  
 H,0,3.2676500919,3.1671588287,-6.2557094523  
 H,0,5.4548230431,3.3820237222,-5.0942653021  
 H,0,3.6528847604,1.9471855059,-1.4696712447  
 H,0,1.4882872091,1.7376628847,-2.6309845186  
 C,0,6.1056814602,2.5020846657,-1.3151297761  
 H,0,7.1533794836,2.6916541228,-1.0844002868  
 H,0,5.4716462354,3.1226853824,-0.6706152908  
 H,0,5.8784065544,1.4439278418,-1.1387062069

#### M062X/6-31+G\*\*/PCM

This structure was optimized with the Gaussian options  
 int(grid=ultrafine) and nosymm.  
 anisaldehydeAllylBegProductM062XPCM  
 anisaldehyde product complex  
 E(RM062X) = -831.176616703

Zero-point correction= 0.291228 (Hartree/Particle)  
 Thermal correction to Energy= 0.308525  
 Thermal correction to Enthalpy= 0.309469  
 Thermal correction to Gibbs Free Energy= 0.243787  
 Sum of electronic and ZPE= -830.885389  
 Sum of electronic and thermal Energies= -830.868092  
 Sum of electronic and thermal Enthalpies= -830.867148  
 Sum of electronic and thermal Free Energies= -830.932830

E CV S  
 KCal/Mol Cal/Mol-K Cal/Mol-K  
 Total 193.602 64.096 138.239

C,0,3.5781511914,2.2772874708,-2.5025277111  
 C,0,2.3469353573,2.1673897107,-3.15551773  
 C,0,2.2240563764,2.4367452745,-4.5153535175  
 C,0,3.3660723139,2.8260754914,-5.2262432794  
 C,0,4.5949505501,2.9450945094,-4.5939143676  
 C,0,4.7064696966,2.6706457567,-3.2247384103

C,0,0.8864578557,2.3830276527,-5.2153944989  
 O,0,0.0313616937,1.4708055039,-4.5301425628  
 B,0,-0.9359015517,0.81573149,-5.2185253573  
 C,0,-2.2916441497,3.7899672436,-5.3673163778  
 C,0,-1.0985447084,3.7480697004,-5.962600621  
 C,0,0.2102774213,3.7678649695,-5.2271837915  
 O,0,5.9507168459,2.8090078184,-2.6897967563  
 O,0,-1.9661714333,0.1655447458,-4.5782351507  
 C,0,-2.6844934303,-0.5586700059,-5.5857068446  
 C,0,-2.2451826526,0.1010924132,-6.9029724659  
 O,0,-0.9734347709,0.6828839581,-6.5907333622  
 H,0,-3.7564823031,-0.4722835223,-5.4026436248  
 H,0,-2.9298523052,0.901686597,-7.2037232743  
 H,0,-2.3918019573,-1.612165081,-5.53970875  
 H,0,-2.3779521249,3.8762898607,-4.2864554943  
 H,0,-3.2140585061,3.7439233146,-5.9384973147  
 H,0,-1.0447897898,3.647300437,-7.0466745932  
 H,0,0.9031785186,4.4780104747,-5.6930795382  
 H,0,0.0612111729,4.0741601782,-4.1848607731  
 H,0,1.0310478525,2.0416849814,-6.2483922432  
 H,0,-2.132180523,-0.6089570692,-7.7231732229  
 H,0,3.2935226635,3.0350372276,-6.2912790576  
 H,0,5.483921878,3.2413297531,-5.1413052293  
 H,0,3.638836879,2.0536393619,-1.4442669809  
 H,0,1.4721264407,1.8558589382,-2.5935562611  
 C,0,6.1061432825,2.5380186452,-1.3063490747  
 H,0,7.1582525893,2.7071883255,-1.0826445329  
 H,0,5.4898522204,3.212421785,-0.7020458695  
 H,0,5.8452364069,1.499027089,-1.0777563604

**B3LYP/6-31+G\*\***

anialdehydeAllylBegProductB3PSP  
 anialdehyde product complex  
 E(RB3LYP) = -831.522521789

Zero-point correction= 0.288021 (Hartree/Particle)  
 Thermal correction to Energy= 0.305664  
 Thermal correction to Enthalpy= 0.306608  
 Thermal correction to Gibbs Free Energy= 0.239534  
 Sum of electronic and ZPE= -831.234501  
 Sum of electronic and thermal Energies= -831.216858  
 Sum of electronic and thermal Enthalpies= -831.215914  
 Sum of electronic and thermal Free Energies= -831.282988

| E             | CV        | S         |
|---------------|-----------|-----------|
| KCal/Mol      | Cal/Mol-K | Cal/Mol-K |
| Total 191.807 | 64.881    | 141.169   |

C,0,3.4795091444,2.2642966388,-2.5280740179  
 C,0,2.2222338764,2.2622758003,-3.1441126505  
 C,0,2.081056661,2.5384926406,-4.5055501514  
 C,0,3.2385327256,2.8173823564,-5.2495887016  
 C,0,4.4947868141,2.8290639567,-4.6532230274  
 C,0,4.6221363397,2.552714132,-3.2837183717  
 C,0,0.7204020967,2.5912058935,-5.1744032329  
 O,0,-0.1800697835,1.6976077764,-4.501510151  
 B,0,-0.9467425975,0.8102417775,-5.1763758318  
 C,0,-2.3492736972,4.4612676727,-5.4290623359  
 C,0,-1.1536600119,4.145379234,-5.9353090993  
 C,0,0.1152810095,4.0139732321,-5.1388215336  
 O,0,5.8971355817,2.58187234,-2.7866187036  
 O,0,-1.8739349335,0.016209644,-4.532801125  
 C,0,-2.3831754396,-0.9124724729,-5.5016635922  
 C,0,-1.9406158963,-0.3345714007,-6.8669073354  
 O,0,-0.881289189,0.5810335743,-6.5412004548

H,0,-3.4698076239,-0.982977967,-5.4004755325  
 H,0,-2.7459702209,0.2212376487,-7.3614840452  
 H,0,-1.9453347135,-1.8995713551,-5.3105235464  
 H,0,-2.4856395236,4.6471019035,-4.3661136675  
 H,0,-3.2302954107,4.5460336737,-6.0590753944  
 H,0,-1.065953844,3.9585299094,-7.0068060375  
 H,0,0.8738243729,4.7010655266,-5.5375054191  
 H,0,-0.0547755538,4.290237386,-4.0917064759  
 H,0,0.8262259698,2.276445172,-6.2197116364  
 H,0,-1.5621353288,-1.096657903,-7.5537026813  
 H,0,3.1587730737,3.0223688509,-6.3150403169  
 H,0,5.3902307991,3.0389555764,-5.2292998826  
 H,0,3.5498094482,2.0372838207,-1.4708673431  
 H,0,1.341709521,2.0244537647,-2.5562755597  
 C,0,6.093876555,2.3041069103,-1.4063775665  
 H,0,7.1684774224,2.3840458678,-1.2370535707  
 H,0,5.5709941965,3.0314612935,-0.7724167298  
 H,0,5.75996716,1.2906421253,-1.1499392784

**B3LYP/6-31+G\*\*/PCM**

anialdehydeAllylBegProductB3PSP  
 anialdehyde product complex  
 E(RB3LYP) = -831.532730584

Zero-point correction= 0.287795 (Hartree/Particle)  
 Thermal correction to Energy= 0.305514  
 Thermal correction to Enthalpy= 0.306458  
 Thermal correction to Gibbs Free Energy= 0.238232  
 Sum of electronic and ZPE= -831.244936  
 Sum of electronic and thermal Energies= -831.227216  
 Sum of electronic and thermal Enthalpies= -831.226272  
 Sum of electronic and thermal Free Energies= -831.294499

| E             | CV        | S         |
|---------------|-----------|-----------|
| KCal/Mol      | Cal/Mol-K | Cal/Mol-K |
| Total 191.713 | 65.026    | 143.595   |

C,0,3.3586279988,2.4170660364,-2.566021469  
 C,0,2.0949739598,2.5455667245,-3.1518950944  
 C,0,1.9359621818,2.6059678792,-4.5405670271  
 C,0,3.0855427719,2.5339300505,-5.3420548902  
 C,0,4.3528343351,2.4138044651,-4.7769189432  
 C,0,4.4967000151,2.3546569631,-3.3825902567  
 C,0,0.5688463912,2.7835212666,-5.1722869342  
 O,0,-0.3751898898,1.8791889695,-4.5580419832  
 B,0,-0.9016971832,0.824764552,-5.2273050312  
 C,0,-2.405830117,4.8576276618,-5.1945544105  
 C,0,-1.2567051701,4.4628933131,-5.7522411457  
 C,0,0.0273025113,4.2177291206,-5.0074809006  
 O,0,5.7773418954,2.2319003172,-2.9173689888  
 O,0,-1.8260106936,-0.0088762495,-4.6295261633  
 C,0,-2.0677572797,-1.0994192226,-5.5442798687  
 C,0,-1.4809819388,-0.615778209,-6.8888979134  
 O,0,-0.59585688,0.468078544,-6.5270234033  
 H,0,-3.1408835369,-1.2965630001,-5.5955855449  
 H,0,-2.251854248,-0.2252381623,-7.5611319304  
 H,0,-1.5567951541,-1.9917405226,-5.1676109236  
 H,0,-2.4900291413,5.0249719697,-4.1227829666  
 H,0,-3.2983729066,5.0280967104,-5.7902737534  
 H,0,-1.218712119,4.3038582892,-6.8314110054  
 H,0,0.8040223281,4.8980135089,-5.3821097731  
 H,0,-0.1006421141,4.4274084036,-3.9391602924  
 H,0,0.6414938616,2.5515523704,-6.2404055299  
 H,0,-0.9098185373,-1.3885100152,-7.4079929708  
 H,0,2.9908120874,2.5693581109,-6.4246731112

H,0,5.2395310728,2.3557110197,-5.4004642647  
 H,0,3.4396345962,2.3669568892,-1.486871719  
 H,0,1.2211896353,2.586047638,-2.5082627722  
 C,0,5.9881735585,2.1700305349,-1.505487858  
 H,0,7.0660647748,2.079009751,-1.3707047168

H,0,5.6339612404,3.0819656079,-1.0114342064  
 H,0,5.4904106942,1.297183714,-1.0678972377

## Sample input files for POLYRATE calculations

### file p.dat

\*General

TITLE  
 allylboration of anisaldehyde parent  
 calculation of rates parent  
 pcm  
 END

#### ATOMS

|    |   |               |
|----|---|---------------|
| 1  | C |               |
| 2  | C |               |
| 3  | C |               |
| 4  | C |               |
| 5  | C |               |
| 6  | C |               |
| 7  | C | 13.0033548378 |
| 8  | O |               |
| 9  | B |               |
| 10 | C |               |
| 11 | C |               |
| 12 | C |               |
| 13 | O |               |
| 14 | O |               |
| 15 | C |               |
| 16 | C |               |
| 17 | O |               |
| 18 | H |               |
| 19 | H |               |
| 20 | H |               |
| 21 | H |               |
| 22 | H |               |
| 23 | H |               |
| 24 | H |               |
| 25 | H |               |
| 26 | H |               |
| 27 | H |               |
| 28 | H |               |
| 29 | H |               |
| 30 | H |               |
| 31 | H |               |
| 32 | C |               |
| 33 | H |               |
| 34 | H |               |
| 35 | H |               |

END

NOSUPERMOL

INPUNIT AU

\*OPTIMIZATION

OPTMIN OHOOK

OPTTS OHOOK

\*SECOND

HESSCAL HHOOK

\*REACT1

SPECIES NONLINRP

STATUS 2

GEOM

|    |             |             |              |
|----|-------------|-------------|--------------|
| 1  | 6.90325514  | 4.04792128  | -4.67562468  |
| 2  | 4.59103976  | 3.30699279  | -5.67720628  |
| 3  | 4.13780782  | 3.43907626  | -8.27493114  |
| 4  | 6.04159241  | 4.33619520  | -9.88474670  |
| 5  | 8.35419724  | 5.08295717  | -8.91920515  |
| 6  | 8.79348104  | 4.94227312  | -6.30681309  |
| 7  | 1.68612830  | 2.68844775  | -9.34688937  |
| 8  | -0.09757793 | 1.91503711  | -8.10567593  |
| 9  | -4.09837336 | 3.47168635  | -10.69950530 |
| 10 | -3.85848176 | 6.28305830  | -9.74989491  |
| 11 | -1.70965840 | 7.69088214  | -10.94960010 |
| 12 | 0.30432916  | 8.57995487  | -9.71813533  |
| 13 | 11.09976870 | 5.71264220  | -5.52891179  |
| 14 | -5.62193198 | 1.70559634  | -9.56084491  |
| 15 | -5.10248078 | -0.67989305 | -10.73096180 |
| 16 | -3.70528720 | 0.00336631  | -13.19358370 |
| 17 | -2.95001565 | 2.58365989  | -12.85563800 |
| 18 | -6.87463708 | -1.68082904 | -11.06531600 |
| 19 | -4.93031922 | -0.11425402 | -14.85414660 |
| 20 | -3.91336995 | -1.78791465 | -9.45476098  |
| 21 | -3.66954085 | 6.27994865  | -7.68759848  |
| 22 | -5.65392507 | 7.23676617  | -10.18036450 |
| 23 | -1.81367795 | 7.94045828  | -12.99211110 |
| 24 | 1.82667488  | 9.54388636  | -10.70031860 |
| 25 | 0.49780423  | 8.34881781  | -7.68333805  |
| 26 | 1.50390660  | 2.86396074  | -11.42141640 |
| 27 | -2.02899440 | -1.16063002 | -13.50264020 |
| 28 | 5.68875899  | 4.45412064  | -11.90565620 |
| 29 | 9.85041104  | 5.78536130  | -10.13125910 |
| 30 | 7.21853139  | 3.93035125  | -2.65713786  |
| 31 | 3.10525366  | 2.61672337  | -4.44149662  |
| 32 | 11.65027340 | 5.62693054  | -2.90030193  |
| 33 | 13.57382490 | 6.32827102  | -2.70608960  |
| 34 | 10.35631110 | 6.84054688  | -1.83707749  |
| 35 | 11.54129910 | 3.68849801  | -2.18755766  |

END

\*PROD1

SPECIES NONLINRP

STATUS 2

GEOM

|   |            |            |             |
|---|------------|------------|-------------|
| 1 | 6.76172581 | 4.30344965 | -4.72909201 |
| 2 | 4.43506508 | 4.09577298 | -5.96306432 |
| 3 | 4.20285746 | 4.60478122 | -8.53278154 |

|                  |             |             |              |                        |             |             |             |
|------------------|-------------|-------------|--------------|------------------------|-------------|-------------|-------------|
| 4                | 6.36095482  | 5.34050871  | -9.87616850  | 28                     | 4.06414754  | 1.31122860  | -3.33130788 |
| 5                | 8.68319813  | 5.56542206  | -8.68124003  | 29                     | 8.18957607  | 1.71813599  | -1.11371838 |
| 6                | 8.89393878  | 5.04678908  | -6.09387245  | 30                     | 4.52920200  | 0.03441684  | 5.95312115  |
| 7                | 1.67516258  | 4.50326963  | -9.85566728  | 31                     | 0.45151893  | -0.36975982 | 3.73995825  |
| 8                | 0.05926501  | 2.77941960  | -8.56072879  | 32                     | 9.21023967  | 0.83612353  | 6.22072237  |
| 9                | -1.76859762 | 1.54150911  | -9.86158374  | 33                     | 11.20342050 | 1.12938102  | 6.63478568  |
| 10               | -4.33057984 | 7.16200014  | -10.14275800 | 34                     | 8.07382727  | 2.21988907  | 7.25658332  |
| 11               | -2.07594864 | 7.08282526  | -11.26768220 | 35                     | 8.65943697  | -1.07949301 | 6.77433004  |
| 12               | 0.39736674  | 7.12023290  | -9.87794581  | END                    |             |             |             |
| 13               | 11.24522510 | 5.30825548  | -5.08297922  | # end of start section |             |             |             |
| 14               | -3.71552554 | 0.31283423  | -8.65161061  | *PATH                  |             |             |             |
| 15               | -5.07295739 | -1.05573331 | -10.55545620 | SCALEMASS 1.00         |             |             |             |
| 16               | -4.24278033 | 0.19103697  | -13.04472750 | RODS ON                |             |             |             |
| 17               | -1.83952513 | 1.29046366  | -12.45468110 | INTMU 3                |             |             |             |
| 18               | -7.09872278 | -0.89248651 | -10.20951680 | SSTEP 0.001            |             |             |             |
| 19               | -5.53661847 | 1.70394073  | -13.61306410 | INH 10                 |             |             |             |
| 20               | -4.51985066 | -3.04655048 | -10.46853240 | SRANGE                 |             |             |             |
| 21               | -4.49367827 | 7.32512625  | -8.10022697  | SLP 0.5                |             |             |             |
| 22               | -6.07369035 | 7.07498973  | -11.22213360 | SLM -0.5               |             |             |             |
| 23               | -1.97436657 | 6.89239895  | -13.31628510 | END                    |             |             |             |
| 24               | 1.70676005  | 8.46221342  | -10.75836120 | RPM pagem              |             |             |             |
| 25               | 0.11567235  | 7.69904696  | -7.90824077  | SIGN REACTANT          |             |             |             |
| 26               | 1.94839807  | 3.85822546  | -11.80775010 | IDIRECT 1              |             |             |             |
| 27               | -4.02923725 | -1.15076209 | -14.59468230 | COORD CART             |             |             |             |
| 28               | 6.22385585  | 5.73538916  | -11.88879440 | FREQSCALE 0.9614       |             |             |             |
| 29               | 10.36311050 | 6.12522554  | -9.71565885  | PRPATH                 |             |             |             |
| 30               | 6.87640514  | 3.88081597  | -2.72926906  | COORD 3 4              |             |             |             |
| 31               | 2.78191581  | 3.50706513  | -4.90111104  | INTERVAL 1             |             |             |             |
| 32               | 11.53893850 | 4.79616016  | -2.46864199  | XMOL                   |             |             |             |
| 33               | 13.52713700 | 5.11584453  | -2.04590167  | END                    |             |             |             |
| 34               | 10.37431720 | 6.07059740  | -1.32667443  | EXFIRST                |             |             |             |
| 35               | 11.04589600 | 2.83275066  | -2.03666436  | EXPROD                 |             |             |             |
| END              |             |             |              |                        |             |             |             |
| *START           |             |             |              |                        |             |             |             |
| SPECIES NONLINTS |             |             |              |                        |             |             |             |
| STATUS 2         |             |             |              |                        |             |             |             |
| GEOM             |             |             |              |                        |             |             |             |
| 1                | 4.44942891  | 0.32173551  | 3.92865198   | EXNSTEP 200            |             |             |             |
| 2                | 2.14558568  | 0.09456480  | 2.68016243   | EXSTEP 0.005           |             |             |             |
| 3                | 1.98269039  | 0.44276001  | 0.07007313   | END                    |             |             |             |
| 4                | 4.17443104  | 1.03463720  | -1.29859636  | EXSECOND               |             |             |             |
| 5                | 6.47654967  | 1.26875598  | -0.08181273  | EXREACT                |             |             |             |
| 6                | 6.62574490  | 0.91419678  | 2.54248038   | EXNSTEP 200            |             |             |             |
| 7                | -0.43557128 | 0.17336763  | -1.27031422  | EXSTEP 0.005           |             |             |             |
| 8                | -2.28952701 | -0.91338320 | -0.12058890  | END                    |             |             |             |
| 9                | -4.84458193 | -0.94771565 | -1.40280248  | SPECSTOP               |             |             |             |
| 10               | -5.80019046 | 2.14601630  | -1.12065956  | CURVE vag              |             |             |             |
| 11               | -3.82449264 | 3.52243003  | -2.37531258  | POINT savegrid         |             |             |             |
| 12               | -1.56617651 | 4.10762827  | -1.24205192  | PERCENTDOWN 95.        |             |             |             |
| 13               | 8.95182717  | 1.17784981  | 3.56925052   | END                    |             |             |             |
| 14               | -6.54227819 | -2.63599425 | -0.14135971  | *TUNNEL                |             |             |             |
| 15               | -6.66262442 | -4.84442922 | -1.66608678  | QUAD                   |             |             |             |
| 16               | -6.24657682 | -3.84490269 | -4.34755308  | NQE 40                 |             |             |             |
| 17               | -4.60261691 | -1.74869601 | -4.00690138  |                        |             |             |             |
| 18               | -8.48933616 | -5.77601596 | -1.41490468  |                        |             |             |             |
| 19               | -8.03619220 | -3.20842475 | -5.18664798  |                        |             |             |             |
| 20               | -5.15113668 | -6.16639849 | -1.13241453  |                        |             |             |             |
| 21               | -5.97860343 | 2.53374923  | 0.89771683   |                        |             |             |             |
| 22               | -7.62070558 | 2.17622245  | -2.08784478  |                        |             |             |             |
| 23               | -3.94777513 | 3.70740563  | -4.42316838  |                        |             |             |             |
| 24               | -0.06834006 | 5.02674182  | -2.30009278  |                        |             |             |             |
| 25               | -1.43787214 | 4.19336564  | 0.80590347   |                        |             |             |             |
| 26               | -0.36762201 | 0.03104691  | -3.32747858  |                        |             |             |             |
| 27               | -5.37759257 | -5.23735835 | -5.60409028  |                        |             |             |             |

```

NQTH 40
END

SCT
*RATE

FORWARDK

SIGMAF 1
CVT

TEMP
195.15
273.15
298.15
END

File p.70
*GRGENERAL

GRRESTART
RSTTOL 0.00001

*GRSTART

CHARGE 0
MULTIPLICITY 1

*GRREACT1

CHARGE 0
MULTIPLICITY 1

*GRPROD1

CHARGE 0
MULTIPLICITY 1

*GRCOMMON

GRENER
#p M062X/6-31+G** UNITS=AU FCHK NOSYMM
scf=tight int(grid=ultrafine)
scrf=(pcm,solvent=dichloromethane)
END

GRFIRST
#p M062X/6-31+G** FORCE UNITS=AU FCHK NOSYMM
scf=tight guess=tcheck
scrf=(pcm,solvent=dichloromethane) int(grid=ultrafine)
END

GRSEC
#p M062X/6-31+G** FREQ=NORAMAN UNITS=AU FCHK
NOSYMM
scf=tight guess=tcheck
scrf=(pcm,solvent=dichloromethane) int(grid=ultrafine)
END

GRLINK0
%chk=g09.chk
%nproc=8
%mem=4gb
END

```

## References

- S1. Roush, W. R.; Walts, A. E.; Hoong, L. K. *J. Am. Chem. Soc.* **1985**, *107*, 8186- 8190.
- S2. (Complete Reference 19) Gaussian 09, Revision A.02, Frisch, M. J.; Trucks, G. W.; Schlegel, H. B.; Scuseria, G. E.; Robb, M. A.; Cheeseman, J. R.; Scalmani, G.; Barone, V.; Mennucci, B.; Petersson, G. A.; Nakatsuji, H.; Caricato, M.; Li, X.; Hratchian, H. P.; Izmaylov, A. F.; Bloino, J.; Zheng, G.; Sonnenberg, J. L.; Hada, M.; Ehara, M.; Toyota, K.; Fukuda, R.; Hasegawa, J.; Ishida, M.; Nakajima, T.; Honda, Y.; Kitao, O.; Nakai, H.; Vreven, T.; Montgomery, Jr., J. A.; Peralta, J. E.; Ogliaro, F.; Bearpark, M.; Heyd, J. J.; Brothers, E.; Kudin, K. N.; Staroverov, V. N.; Kobayashi, R.; Normand, J.; Raghavachari, K.; Rendell, A.; Burant, J. C.; Iyengar, S. S.; Tomasi, J.; Cossi, M.; Rega, N.; Millam, N. J.; Klene, M.; Knox, J. E.; Cross, J. B.; Bakken, V.; Adamo, C.; Jaramillo, J.; Gomperts, R.; Stratmann, R. E.; Yazyev, O.; Austin, A. J.; Cammi, R.; Pomelli, C.; Ochterski, J. W.; Martin, R. L.; Morokuma, K.; Zakrzewski, V. G.; Voth, G. A.; Salvador, P.;



---

Dannenberg, J. J.; Dapprich, S.; Daniels, A. D.; Farkas, Ö.; Foresman, J. B.; Ortiz, J. V.; Cioslowski, J.; Fox, D. J. Gaussian, Inc., Wallingford CT, 2009.

- S3. Gaussian 03, Revision E.01, M. J. Frisch, G. W. Trucks, H. B. Schlegel, G. E. Scuseria, M. A. Robb, J. R. Cheeseman, J. A. Montgomery, Jr., T. Vreven, K. N. Kudin, J. C. Burant, J. M. Millam, S. S. Iyengar, J. Tomasi, V. Barone, B. Mennucci, M. Cossi, G. Scalmani, N. Rega, G. A. Petersson, H. Nakatsuji, M. Hada, M. Ehara, K. Toyota, R. Fukuda, J. Hasegawa, M. Ishida, T. Nakajima, Y. Honda, O. Kitao, H. Nakai, M. Klene, X. Li, J. E. Knox, H. P. Hratchian, J. B. Cross, V. Bakken, C. Adamo, J. Jaramillo, R. Gomperts, R. E. Stratmann, O. Yazyev, A. J. Austin, R. Cammi, C. Pomelli, J. W. Ochterski, P. Y. Ayala, K. Morokuma, G. A. Voth, P. Salvador, J. J. Dannenberg, V. G. Zakrzewski, S. Dapprich, A. D. Daniels, M. C. Strain, O. Farkas, D. K. Malick, A. D. Rabuck, K. Raghavachari, J. B. Foresman, J. V. Ortiz, Q. Cui, A. G. Baboul, S. Clifford, J. Cioslowski, B. B. Stefanov, G. Liu, A. Liashenko, P. Piskorz, I. Komaromi, R. L. Martin, D. J. Fox, T. Keith, M. A. Al-Laham, C. Y. Peng, A. Nanayakkara, M. Challacombe, P. M. W. Gill, B. Johnson, W. Chen, M. W. Wong, C. Gonzalez, and J. A. Pople, Gaussian, Inc., Wallingford CT, 2004.
- S4. (Complete Reference 18) J. Zheng, S. Zhang, B. J. Lynch, J. C. Corchado, Y.-Y. Chuang, P. L. Fast, W.-P. Hu, Y.-P. Liu, G. C. Lynch, K. A. Nguyen, C. F. Jackels, A. Fernandez Ramos, B. A. Ellingson, V. S. Melissas, J. Villà, I. Rossi, E. L. Coitiño, J. Pu, T. V. Albu, R. Steckler, B. C. Garrett, A. D. Isaacson, and D. G. Truhlar, POLYRATE—version 2010, University of Minnesota, Minneapolis, 2010.
